# Supplementary material
Source: Royal Society of Chemistry journal article supplement (doi:10.1039/d6cc01588c)
Supplement: d6cc01588c1.pdf [file d6cc01588c1.pdf]

# PIDA-Mediated Oxidative Ring-Opening of 2*H*-Indazoles with *N*-Hydroxyphthalimide

Arindam Barman, Krishna Kanta Das, and Alakananda Hajra\*

<sup>a</sup>Department of Chemistry, Visva-Bharati (A Central University), Santiniketan 731235, India;

Tel./Fax: +913463 261526; E-mail: [alakananda.hajra@visva-bharati.ac.in](mailto:alakananda.hajra@visva-bharati.ac.in)

## Table of Contents

|    |                                                                      |         |
|----|----------------------------------------------------------------------|---------|
| 1. | <b>General Information</b>                                           | S2      |
| 2. | <b>Experimental Procedures</b>                                       | S2      |
| 3. | <b>Gram-Scale Preparations</b>                                       | S3      |
| 4. | <b>Synthetic Transformations</b>                                     | S3-S4   |
| 5. | <b>Structure determination (X-ray crystallographic data for 3ia)</b> | S5- S6  |
| 6. | <b>Radical Trapping Experiment &amp; Reaction intermediate</b>       | S6- S7  |
| 7. | <b>Characterization Data for the Synthesized Products</b>            | S8-S19  |
| 8. | <b>References</b>                                                    | S20     |
| 9. | <b>NMR Spectra for the Synthesized Products</b>                      | S20-S82 |

## 1. General Information:

All reagents were purchased from commercial sources and used without further purification.  $^1\text{H}$  NMR spectra were determined on 400 MHz spectrometer as solutions in  $\text{CDCl}_3$ . Chemical shifts are expressed in parts per million ( $\delta$ ) and the signals were reported as s (singlet), d (doublet), t (triplet), m (multiplet) and coupling constants ( $J$ ) were given in Hz.  $^{13}\text{C}\{^1\text{H}\}$  NMR spectra were recorded at 100 MHz in  $\text{CDCl}_3$  solution. Chemical shifts as internal standard is referenced to  $\text{CDCl}_3$  ( $\delta = 7.26$  for  $^1\text{H}$  and  $\delta = 77.16$  for  $^{13}\text{C}\{^1\text{H}\}$  NMR) for as internal standard. Thin-layer chromatography (TLC) was performed on Merck pre-coated silica gel 60 F254 aluminum sheets with detection under UV light at 254 nm. Chromatographic separations were carried out on silica gel (60-120 mesh or 100–200 mesh). All 2-arylidazoles<sup>1</sup> were prepared by the reported methods. All solvents were dried and distilled before use. Commercially available solvents were freshly distilled before the reaction. All reactions involving moisture sensitive reactants were executed using oven dried glassware. Melting points (M.p.) were determined after recrystallization of solid compounds from a solution of dichloromethane/petroleum ether (1:3).

## 2. Experimental Procedures:

### 2.1. Typical Experimental Procedure for 3b:

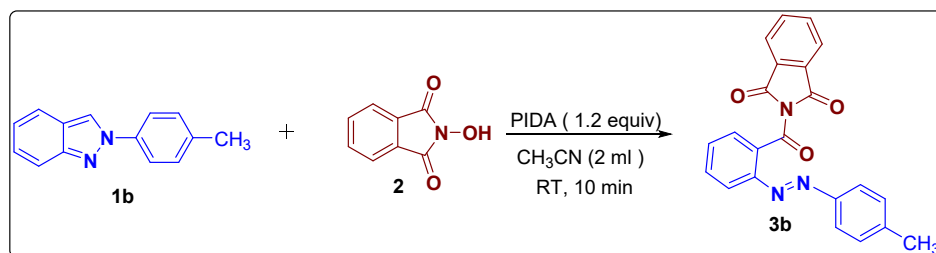

A mixture of 2-(*p*-tolyl)-2*H*-indazole (**1b**) (0.25 mmol, 52.0 mg), *N*-hydroxyphthalimide (**2**) (0.30 mmol, 48.9 mg) together with PIDA [(diacetoxyiodo)benzene] (0.30 mmol, 96.7 mg) in 2 ml of  $\text{CH}_3\text{CN}$  was taken in an oven-dried reaction vessel (tube) at room temperature with a magnetic stirrer for 10 min under open atmosphere. The progress of the reaction was monitored by TLC, the reaction was cooled to room temperature and extracted with ethyl acetate. The organic phase was dried over anhydrous  $\text{Na}_2\text{SO}_4$ . The crude residue was obtained after evaporating the solvent in vacuum and was purified by column chromatography on silica gel using a mixture of petroleum ether and ethyl acetate.

### 3. Gram-Scale Preparations:

#### 3.1. Synthesis of **3b** on 5.0 mmol Scale:

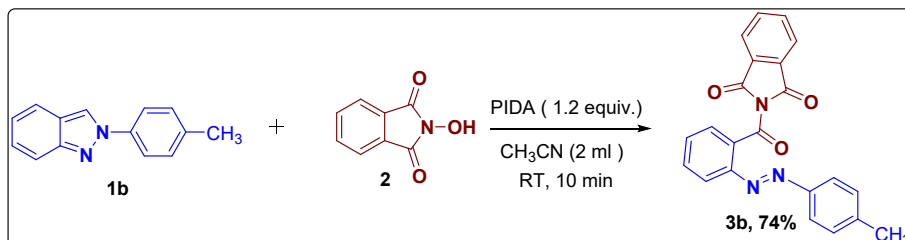

A mixture of 2-(*p*-tolyl)-2*H*-indazole (**1b**) (5.0 mmol, 1.04 g), *N*-hydroxyphthalimide (**2**) (6.0 mmol, 0.97 g) together with PIDA [(diacetoxyiodo)benzene] (6.0 mmol, 1.93 g) in 2 ml of CH<sub>3</sub>CN was taken in an oven-dried reaction vessel (tube) at room temperature with a magnetic stirrer for 10 min under open atmosphere. The progress of the reaction was monitored by TLC, the reaction was cooled to room temperature and extracted with ethyl acetate. The organic phase was dried over anhydrous Na<sub>2</sub>SO<sub>4</sub>. The crude residue was obtained after evaporating the solvent in vacuum and was purified by column chromatography on silica gel using a mixture of petroleum ether and ethyl acetate as an eluting solvent to afford the pure product **3b** (1.36 gm, 74%) as a yellow solid.

### 4. Synthetic Transformations:

#### 4.1: Synthesis of (*E*)-5-(butylamino)-2-(*p*-tolylidiazenyl)benzaldehyde:<sup>2</sup>

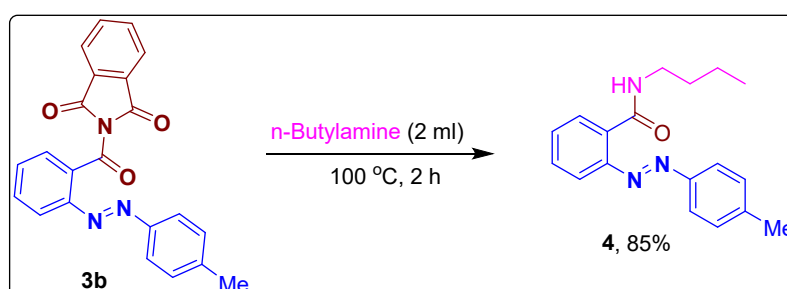

In a flame dried reaction tube (*E*)-2-(2-(*p*-tolylidiazenyl)benzoyl)isoindoline-1,3-dione (**3b**, 0.2 mmol, 74 mg) was added in *n*-BuNH<sub>2</sub> (2 mL) and heated at 100 °C in an oil bath for 2 h. Then the product formation of the reaction was monitored by TLC. After the reaction was completed, the reaction mixture was diluted with ethyl acetate and washed with brine. The organic layer was dried over anhydrous Na<sub>2</sub>SO<sub>4</sub>, concentrated and the crude mixture was purified by a flash column chromatography on silica gel (100-200 mesh) using 40% ethyl

acetate in hexane on silica gel to afford the corresponding product **4** (50.17 mg, 85%) as yellowish white solid.

#### 4.2: Synthesis of 2-(*p*-tolyl)-1,2-dihydro-3H-indazol-3-one (**5**):<sup>3</sup>

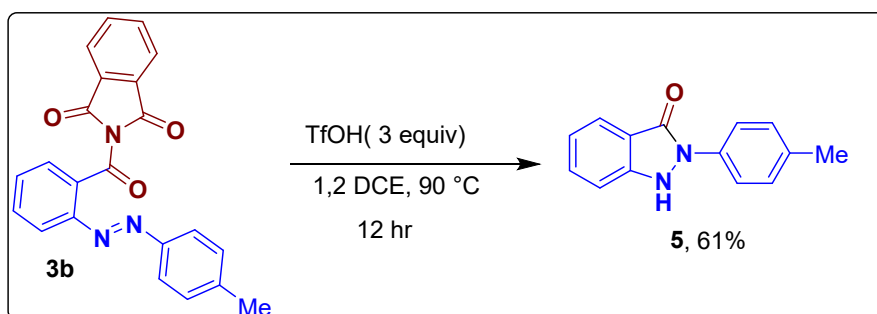

(*E*)-2-(2-(*p*-tolyl)diazenyl)benzoylisoindoline-1,3-dione (**3b**, 74 mg, 0.2 mmol) and triflic acid (CF<sub>3</sub>SO<sub>3</sub>H) (3.0 equiv., 53 μl) in 1,2-DCE (2 mL) as a solvent were taken in a flame dried reaction tube and stirred at 90 °C for 12 hrs in open atmosphere. Then the product formation of the reaction was monitored by TLC. After the reaction was completed, the reaction mixture was diluted with DCM and water. The organic layer was dried over anhydrous Na<sub>2</sub>SO<sub>4</sub>, concentrated and the crude mixture was purified by a flash column chromatography on silica gel (60–120 mesh) using 18% ethyl acetate in hexane on silica gel to furnish the indazolone product **5** (27.4 mg, 61%) as a grey solid.

#### 4.3: Synthesis of methyl (*E*)-2-(*p*-tolyl)diazenylbenzoate (**6**):<sup>4</sup>

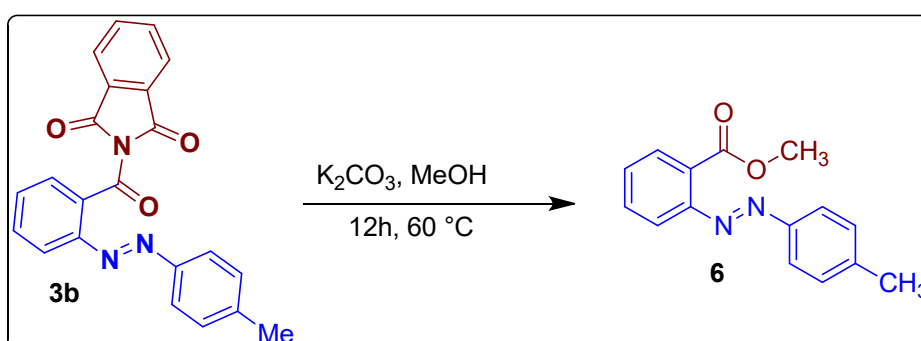

In a round-bottom flask (*E*)-2-(2-(*p*-tolyl)diazenyl)benzoylisoindoline-1,3-dione (**3b**, 74 mg, 0.2 mmol), K<sub>2</sub>CO<sub>3</sub> (0.4 mmol, 55.2 mg) was added and MeOH (3 mL) was taken as solvent at 60°C 12 h. Then the product formation of the reaction was monitored by TLC. After the reaction was completed, the reaction mixture was diluted with DCM and water. The organic layer was dried over anhydrous Na<sub>2</sub>SO<sub>4</sub>, concentrated and the crude mixture was purified by

a column chromatography on silica gel (60–120 mesh) using 16% ethyl acetate in hexane on silica gel to furnish the product **6** (34.5 mg, 68%) as a dark orange.

### 5. Structure determination (X-ray crystallographic data for **3j**):

The Orange crystal of **3j** was obtained by crystallization from a solution in dichloromethane/petroleum ether after purification by column chromatography. Chemical Formula:  $C_{22}H_{15}N_3O_3$

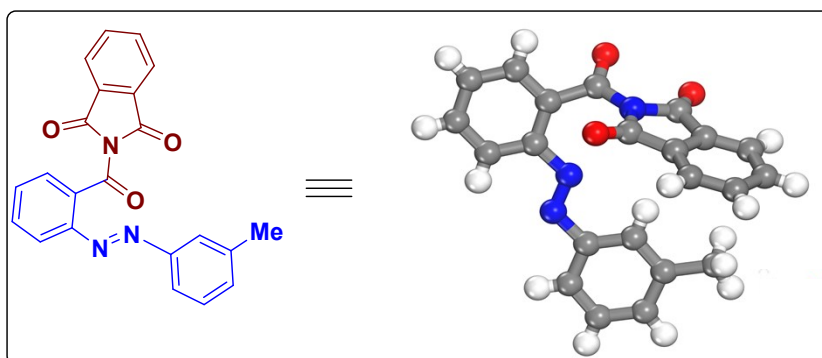

Datablock sd\_vb\_01\_auto\_090925 - ellipsoid plot

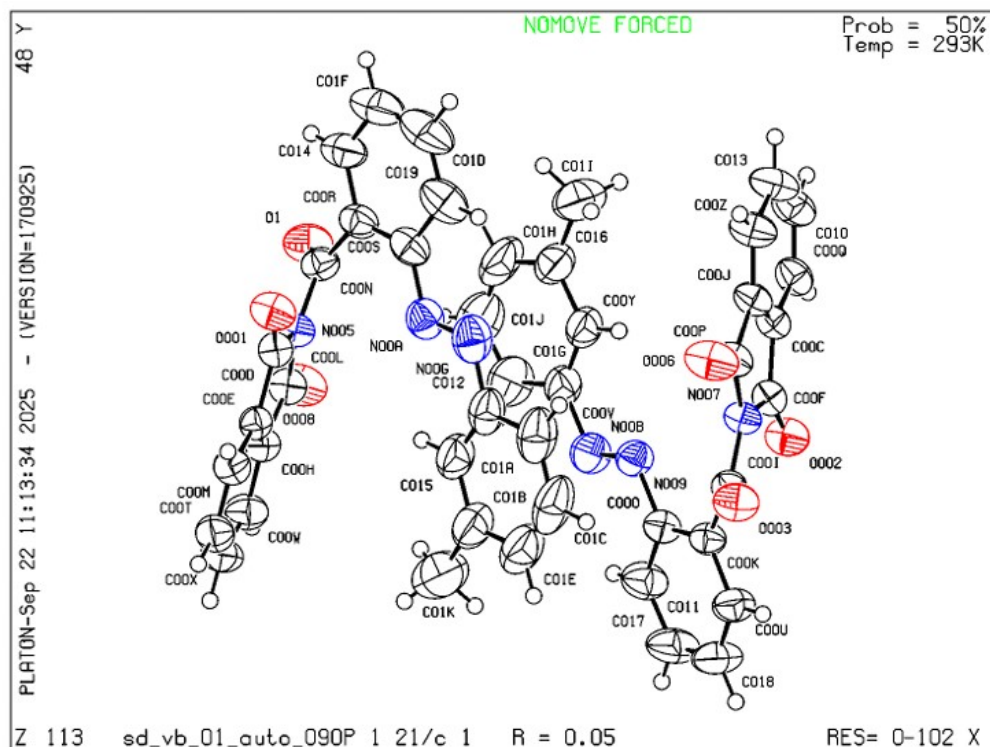

View of ORTEP (with 50% probability) diagram for the structure (*E*)-2-(2-(m-tolyldiazenyl)benzoyl)isoindoline-1,3-dione (**3j**).

|                             |                                                               |                |
|-----------------------------|---------------------------------------------------------------|----------------|
| <b>Wavelength</b>           | =0.71073Å                                                     |                |
| <b>Formula</b>              | C <sub>22</sub> H <sub>15</sub> N <sub>3</sub> O <sub>3</sub> |                |
| <b>Crystal system</b>       | Monoclinic                                                    |                |
| <b>Space group</b>          | P 21/c                                                        |                |
| <b>Unit cell dimensions</b> | a = 8.7305(2) Å                                               | α = 90.0°      |
|                             | b = 17.1804(3) Å                                              | β = 99.034(2)° |
|                             | c = 25.2425(5) Å                                              | γ = 90.0°      |
| <b>Volume</b>               | 3739.24 Å <sup>3</sup>                                        |                |
| <b>Z</b>                    | 8                                                             |                |
| <b>R factor (%)</b>         | 4.61 %                                                        |                |

The crystallographic data have been deposited with the Cambridge Crystallographic Data centre as a supplementary publication with a CCDC reference number 2496070.

## 6. Radical Trapping Experiment & Reaction intermediate:

### 6.1 Radical Trapping Experiment:

A mixture of 2-(*p*-tolyl)-2*H*-indazole (**1b**) (0.25 mmol, 52.0 mg), *N*-hydroxyphthalimide (**2**) (0.30 mmol, 48.9 mg) together with 1.2 equiv. PIDA [(diacetoxyiodo)benzene] (0.30 mmol, 96.7 mg) as an oxidant with radical trapper BHT (3.0 equiv., 165 mg) in 2 ml of CH<sub>3</sub>CN was taken in an oven-dried reaction vessel (tube) at room temperature with a magnetic stirrer for 10 min under open atmosphere. The progress of the reaction was monitored by TLC, the reaction was cooled to room temperature and extracted with ethyl acetate. The organic phase was dried over anhydrous Na<sub>2</sub>SO<sub>4</sub>. The crude residue was obtained after evaporating the solvent in vacuum and was purified by column chromatography on silica gel using a mixture of petroleum ether and ethyl acetate to furnish the product **7** (85%, 81.85 mg) as a Lime greenish solid. BHT formed an adduct (**7**) with radical species generated from the *N*-hydroxyphthalimide, which was detected by NMR & HRMS. The spectra of HRMS (ESI-TOF) *m/z*: [M + K]<sup>+</sup> Calcd for [C<sub>23</sub>H<sub>27</sub>NO<sub>4</sub>K]<sup>+</sup>: 420.1572; found: 420.1559.

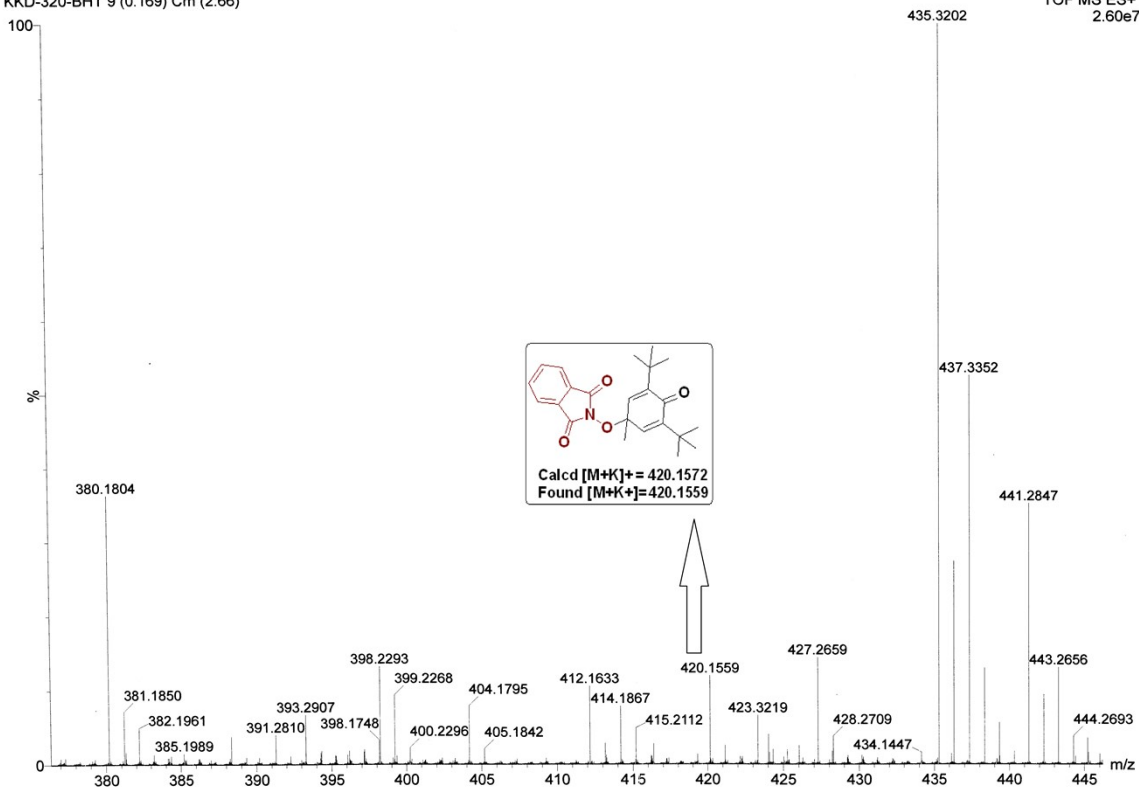

HRMS spectra of BHT adduct

## 7. Characterization Data for the Synthesized Products:

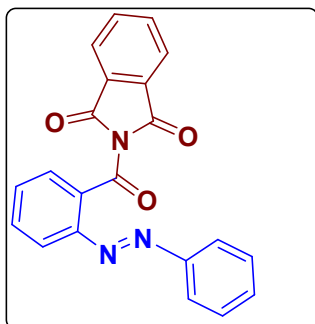

**(E)-2-(2-(phenyldiazenyl)benzoyl)isoindoline-1,3-dione (3a):** Orange red solid(82%, 72.8 mg);  $R_f = 0.50$  (PE/EA = 70:30), M.p. 140-141 °C;  $^1\text{H}$  NMR (400 MHz,  $\text{CDCl}_3$ ):  $\delta$  7.83-7.79 (m, 3H), 7.77-7.75 (m, 1H), 7.73-7.70 (m, 2H), 7.69-7.66 (m, 1H), 7.64-7.60 (m, 1H), 7.53-7.51 (m, 2H), 7.32-7.28 (m, 1H), 7.24-7.20 (m, 2H) ;  $^{13}\text{C}\{^1\text{H}\}$  NMR (100 MHz,  $\text{CDCl}_3$ ):  $\delta$  166.2, 164.7, 151.8, 149.7, 135.3, 132.4, 131.6, 131.26, 131.23, 131.1, 129.9, 128.9, 124.3, 122.8, 119.1; HRMS (ESI-TOF)  $m/z$ :  $[\text{M} + \text{H}]^+$  Calcd for  $[\text{C}_{21}\text{H}_{14}\text{N}_3\text{O}_3]^+$ : 356.1030 found: 356.1035 .

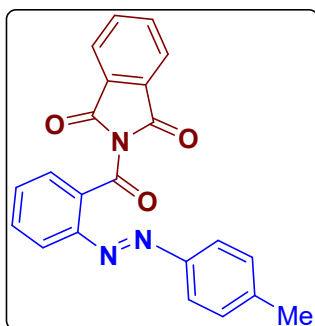

**(E)-2-(2-(p-tolyldiazenyl)benzoyl)isoindoline-1,3-dione (3b):** Orange-red solid (86%, 79.3 mg);  $R_f = 0.50$  (PE/EA = 68:32), M.p. 143-145 °C;  $^1\text{H}$  NMR (400 MHz,  $\text{CDCl}_3$ ):  $\delta$  7.84-7.80 (m, 3H), 7.78-7.76 (m, 1H), 7.74-7.71 (m, 2H), 7.70-7.65 (m, 1H), 7.62-7.58 (m, 1H), 7.42 (d,  $J = 8.4$  Hz, 2H), 7.01 (d,  $J = 8.0$  Hz, 2H), 2.29 (s, 3H);  $^{13}\text{C}\{^1\text{H}\}$  NMR (100 MHz,  $\text{CDCl}_3$ ):  $\delta$  166.4, 164.8, 150.1, 149.9, 142.5, 135.3, 132.5, 131.5, 131.3, 130.8, 129.9, 129.6, 124.4, 123.0, 119.2, 21.5; HRMS (ESI-TOF)  $m/z$ :  $[\text{M} + \text{H}]^+$  Calcd for  $[\text{C}_{22}\text{H}_{16}\text{N}_3\text{O}_3]^+$ : 370.1187 ; found:370.1169 .

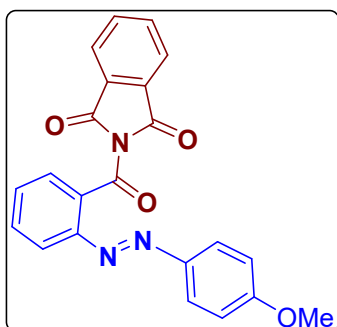

**(E)-2-(2-((4-methoxyphenyl)diazenyl)benzoyl)isoindoline-1,3-dione (3c):** Yellow solid (83%, 79.9 mg);  $R_f = 0.50$  (PE/EA = 66:34), M.p. 113-114 °C;  $^1\text{H NMR}$  (400 MHz,  $\text{CDCl}_3$ ):  $\delta$  7.82-7.79 (m, 2H), 7.77-7.74 (m, 2H), 7.73-7.69 (m, 2H), 7.68-7.64 (m, 1H), 7.59-7.55 (m, 1H), 7.53-7.49 (m, 2H), 6.70 (d,  $J = 8.8$  Hz, 2H), 3.78 (s, 3H);  $^{13}\text{C}\{^1\text{H}\}$  NMR (100 MHz,  $\text{CDCl}_3$ ):  $\delta$  166.4, 164.8, 162.6, 150.1, 146.4, 135.3, 132.5, 131.3, 131.1, 130.4, 130.0, 125.0, 124.4, 119.3, 114.1, 55.6; HRMS (ESI-TOF)  $m/z$ :  $[\text{M} + \text{H}]^+$  Calcd for  $[\text{C}_{22}\text{H}_{16}\text{N}_3\text{O}_4]^+$ : 386.1136; found: 386.1122.

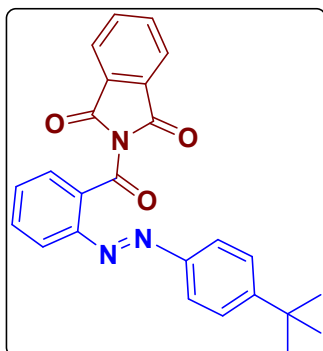

**(E)-2-(2-((4-(tert-butyl)phenyl)diazenyl)benzoyl)isoindoline-1,3-dione (3d):** Orange solid (71%, 72.9 mg);  $R_f = 0.50$  (PE/EA = 76:24), M.p. 148-149 °C;  $^1\text{H NMR}$  (400 MHz,  $\text{CDCl}_3$ ):  $\delta$  7.82-7.77 (m, 4H), 7.71-7.65 (m, 3H), 7.62-7.58 (m, 1H), 7.45 (d,  $J = 8.8$  Hz, 2H), 7.21 (d,  $J = 8.8$  Hz, 2H), 1.25 (s, 9H);  $^{13}\text{C}\{^1\text{H}\}$  NMR (100 MHz,  $\text{CDCl}_3$ ):  $\delta$  166.3, 164.8, 155.4, 150.1, 150.0, 135.2, 132.6, 131.4, 130.8, 130.0, 125.8, 124.4, 123.7, 122.7, 119.2, 35.0, 31.1; HRMS (ESI-TOF)  $m/z$ :  $[\text{M} + \text{H}]^+$  Calcd for  $[\text{C}_{25}\text{H}_{13}\text{N}_3\text{O}_3]^+$ : 412.1656; found: 412.1609.

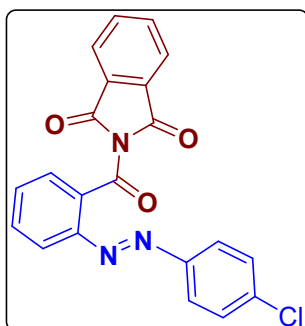

**(E)-2-(2-((4-chlorophenyl)diazenyl)benzoyl)isoindoline-1,3-dione (3e):** Orange solid (73%, 71 mg);  $R_f = 0.50$  (PE/EA = 75:25), M.p. 178-180 °C;  $^1\text{H NMR}$  (400 MHz,  $\text{CDCl}_3$ ):  $\delta$  7.85-7.81 (m, 3H), 7.78-7.74 (m, 3H), 7.71-7.67 (m, 1H), 7.65-7.61 (m, 1H), 7.50-7.48 (m, 2H), 7.22-7.19 (m, 2H);  $^{13}\text{C}\{^1\text{H}\}$  NMR (100 MHz,  $\text{CDCl}_3$ ):  $\delta$  166.1, 164.8, 150.4, 149.7, 137.8, 135.5, 132.5, 131.9, 131.5, 131.3, 130.0, 129.3, 124.5, 124.2, 119.3; HRMS (ESI-TOF)  $m/z$ :  $[\text{M} + \text{H}]^+$  Calcd for  $[\text{C}_{21}\text{H}_{13}\text{ClN}_3\text{O}_3]^+$ : 390.0640; found: 390.0663.

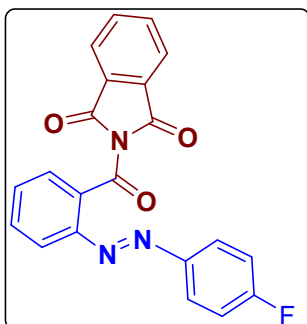

**(E)-2-(2-((4-fluorophenyl)diazenyl)benzoyl)isoindoline-1,3-dione (3f):**<sup>5</sup> Orange solid (78%, 72.75 mg);  $R_f = 0.50$  (PE/EA = 73:27), M.p. 172-173 °C;  $^1\text{H NMR}$  (400 MHz,  $\text{CDCl}_3$ ):  $\delta$  7.85-7.82 (m, 2H), 7.80-7.78 (m, 1H), 7.76-7.72 (m, 3H), 7.71-7.67 (m, 1H), 7.64-7.60 (m, 1H), 7.59-7.54 (m, 2H), 6.94-6.88 (m, 2H);  $^{13}\text{C}\{^1\text{H}\}$  NMR (100 MHz,  $\text{CDCl}_3$ ):  $\delta$  166.2, 164.8, 164.6 (C-F,  $^1J_{\text{C-F}} = 253.0$  Hz), 149.7, 148.55, 148.52, 135.5, 132.5, 131.6, 131.2, 130.0, 125.1 (C-F,  $^3J_{\text{C-F}} = 9.0$  Hz), 124.4, 119.3, 116.0 (C-F,  $^2J_{\text{C-F}} = 23.0$  Hz); HRMS (ESI-TOF)  $m/z$ :  $[\text{M} + \text{H}]^+$  Calcd for  $[\text{C}_{21}\text{H}_{13}\text{FN}_3\text{O}_3]^+$ : 374.0936; found: 374.0954.

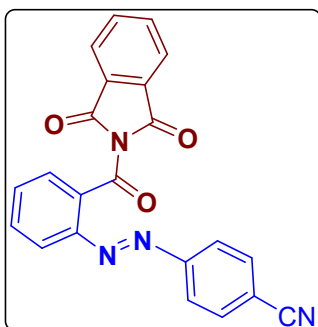

**(E)-4-((2-(1,3-dioxisoindoline-2-carbonyl)phenyl)diazenyl)benzonitrile (3g):** Orange-red solid (58%, 55.11 mg);  $R_f = 0.50$  (PE/EA = 73:27), M.p. 200-202 °C;  $^1\text{H NMR}$  (400 MHz,  $\text{CDCl}_3$ ):  $\delta$  7.88-7.83 (m, 3H), 7.81-7.77 (m, 3H), 7.74-7.68 (m, 2H), 7.65 (d,  $J = 8.4$  Hz, 2H), 7.56 (d,  $J = 8.4$  Hz, 2H);  $^{13}\text{C}\{^1\text{H}\}$  NMR (100 MHz,  $\text{CDCl}_3$ ):  $\delta$  165.9, 164.7, 153.8, 149.4, 135.7, 133.1, 132.59, 132.53, 132.4, 131.2, 129.9, 124.6, 123.4, 119.4, 118.2, 114.6; HRMS (ESI-TOF)  $m/z$ :  $[\text{M} + \text{H}]^+$  Calcd for  $[\text{C}_{22}\text{H}_{13}\text{N}_4\text{O}_3]^+$ : 381.0983; found: 381.0967.

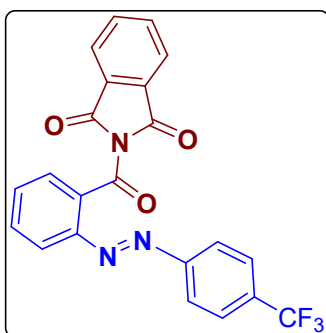

**(E)-2-(2-((4-(trifluoromethyl)phenyl)diazenyl)benzoyl)isoindoline-1,3-dione (3h):**<sup>6</sup> Orange solid (79%, 83.56 mg);  $R_f = 0.50$  (PE/EA = 70:30), M.p. 178-180 °C;  $^1\text{H NMR}$  (400 MHz,  $\text{CDCl}_3$ ):  $\delta$  7.85-7.78 (m, 4H), 7.75-7.72 (m, 2H), 7.71-7.66 (m, 2H), 7.63 (d,  $J = 8.4$  Hz, 2H), 7.49 (d,  $J = 8.4$  Hz, 2H);  $^{13}\text{C}\{^1\text{H}\}$  NMR (100 MHz,  $\text{CDCl}_3$ ):  $\delta$  166.0, 164.8, 153.7, 149.4, 135.5, 132.8, 132.5, 132.2, 132.0, 131.1, 130.0, 126.2 (q,  $J = 5.0$  Hz), 124.4, 123.6 (d,  $J =$

271.0 Hz), 123.0, 119.2; HRMS (ESI-TOF)  $m/z$ :  $[M + H]^+$  Calcd for  $[C_{22}H_{13}F_3N_3O_3]^+$ : 424.0904; found: 424.0866.

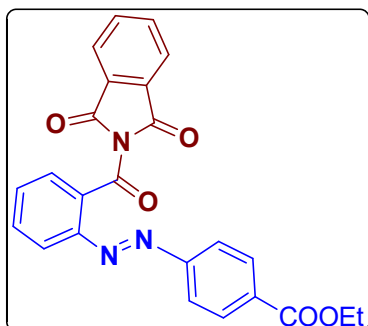

**Ethyl(E)-4-((2-(1,3-dioxoisindoline-2-carbonyl)phenyl)diazinyl)benzoate (3i)**: Brownish orange solid (66%, 70.4 mg);  $R_f = 0.50$  (PE/EA = 72:28), M.p. 130-131 °C;  $^1H$  NMR (400 MHz,  $CDCl_3$ ):  $\delta$  7.91 (d,  $J = 8.4$  Hz, 2H), 7.87- 7.81 (m, 3H), 7.79-7.77 (m, 1H), 7.76-7.73 (m, 2H), 7.71-7.64 (m, 2H), 7.57 (d,  $J = 8.4$  Hz, 2H), 4.38-4.33 (m, 2H), 1.38 (t,  $J = 7.2$  Hz, 3H);  $^{13}C\{^1H\}$  NMR (100 MHz,  $CDCl_3$ ):  $\delta$  166.1, 165.8, 164.8, 154.3, 149.6, 135.6, 132.7, 132.5, 132.2, 131.9, 131.2, 130.4, 130.0, 124.5, 122.7, 119.3, 61.5, 14.4; HRMS (ESI-TOF)  $m/z$ :  $[M + H]^+$  Calcd for  $[C_{24}H_{18}N_3O_5]^+$ : 428.1241; found: 428.1231.

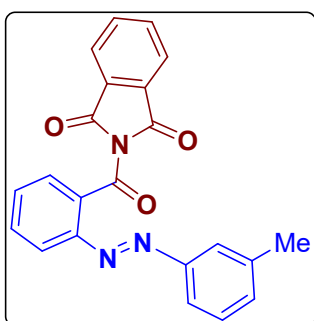

**(E)-2-(2-(m-tolyldiazinyl)benzoyl)isoindoline-1,3-dione (3j)**: Orange solid (94%, 86.74 mg);  $R_f = 0.50$  (PE/EA = 74:26), M.p. 138-140 °C;  $^1H$  NMR (400 MHz,  $CDCl_3$ ):  $\delta$  7.94-7.89 (m, 4H), 7.84-7.80 (m, 2H), 7.77 (d,  $J = 8.0$  Hz, 1H), 7.72 (t,  $J = 7.6$  Hz, 1H), 7.48 (d,  $J = 6.8$  Hz, 1H), 7.37 (s, 1H), 7.25-7.21 (m, 2H), 2.27 (s, 3H);  $^{13}C\{^1H\}$  NMR (100 MHz,  $CDCl_3$ ):  $\delta$  166.3, 164.8, 152.0, 149.8, 138.8, 135.3, 132.5, 131.8, 131.27, 131.23, 131.0, 130.0, 128.7, 124.3, 122.2, 121.4, 118.7, 21.1; HRMS (ESI-TOF)  $m/z$ :  $[M + H]^+$  Calcd for  $[C_{22}H_{16}N_3O_3]^+$ : 370.1187; found: 370.1223.

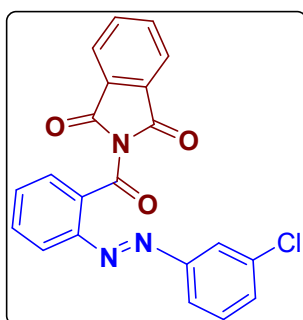

**(E)-2-(2-((3-chlorophenyl)diazenyl)benzoyl)isoindoline-1,3-dione (3k):** Bright orange solid (90%, 87.53 mg);  $R_f = 0.50$  (PE/EA=74:26), M.p. 139-140 °C;  $^1\text{H NMR}$  (400 MHz,  $\text{CDCl}_3$ ):  $\delta$  7.83-7.76 (m, 4H), 7.73-7.71 (m, 2H), 7.68-7.60 (m, 2H), 7.50 (d,  $J = 7.2$  Hz, 1H), 7.35 (s, 1H), 7.26-7.18 (m, 2H);  $^{13}\text{C}\{^1\text{H}\}$  NMR (100 MHz,  $\text{CDCl}_3$ ):  $\delta$  166.0, 164.8, 152.7, 149.4, 135.5, 135.0, 132.6, 132.2, 131.7, 131.4, 131.2, 130.17, 130.12, 124.5, 123.3, 120.9, 118.8; HRMS (ESI-TOF)  $m/z$ :  $[\text{M} + \text{H}]^+$  Calcd for  $[\text{C}_{21}\text{H}_{13}\text{ClN}_3\text{O}_3]^+$ : 390.0640; found: 390.0683.

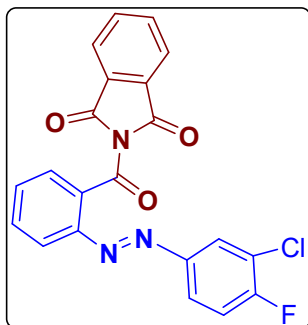

**(E)-2-(2-((3-chloro-4-fluorophenyl)diazenyl)benzoyl)isoindoline-1,3-dione (3l):**<sup>5</sup> Orange solid (72%, 73.26 mg);  $R_f = 0.50$  (PE/EA = 76:24), M.p. 170-172 °C;  $^1\text{H NMR}$  (400 MHz,  $\text{CDCl}_3$ ):  $\delta$  7.87-7.84 (m, 2H), 7.81-7.74 (m, 4H), 7.71-7.63 (m, 2H), 7.60-7.56 (m, 1H), 7.52-7.50 (m, 1H), 7.07 (t,  $J = 8.8$  Hz, 1H);  $^{13}\text{C}\{^1\text{H}\}$  NMR (100 MHz,  $\text{CDCl}_3$ ):  $\delta$  166.0, 164.8, 159.8 (C-F,  $^1J_{\text{C-F}} = 255.0$  Hz), 149.4, 148.6, 135.6, 132.6, 132.1, 131.7, 131.2, 130.1, 125.2 (C-F,  $^3J_{\text{C-F}} = 9.0$  Hz), 124.5, 123.3, 122.2 (C-F,  $^2J_{\text{C-F}} = 19.0$  Hz), 119.0, 116.9 (C-F,  $^2J_{\text{C-F}} = 23.0$  Hz); HRMS (ESI-TOF)  $m/z$ :  $[\text{M} + \text{H}]^+$  Calcd for  $[\text{C}_{21}\text{H}_{12}\text{ClFN}_3\text{O}_3]^+$ : 408.0546; found: 408.0594.

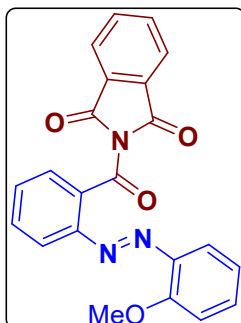

**(E)-2-(2-((2-methoxyphenyl)diazenyl)benzoyl)isoindoline-1,3-dione (3l'):** Orange solid (65%, 62.58 mg);  $R_f = 0.50$  (PE/EA = 80:20), M.p. 168-170 °C;  $^1\text{H NMR}$  (400 MHz,  $\text{CDCl}_3$ ):  $\delta$  7.91 (d,  $J = 8.0$  Hz, 1H), 7.87-7.85 (m, 2H), 7.76-7.74 (m, 2H), 7.68-7.63 (m, 2H), 7.59-7.55 (m, 1H), 7.29-7.22 (m, 2H), 6.89 (d,  $J = 8.4$  Hz, 1H), 6.65 (t,  $J = 7.6$  Hz, 1H), 3.73 (s, 3H);  $^{13}\text{C}\{^1\text{H}\}$  NMR (100 MHz,  $\text{CDCl}_3$ ):  $\delta$  166.5, 164.9, 157.6, 150.1, 141.3, 135.3, 133.4, 131.9, 131.5, 130.8, 130.3, 128.8, 124.3, 122.4, 120.4, 116.6, 112.7, 55.9; HRMS (ESI-TOF)  $m/z$ :  $[\text{M} + \text{H}]^+$  Calcd for  $[\text{C}_{22}\text{H}_{16}\text{N}_3\text{O}_4]^+$ : 386.1135; found: 386.1136.

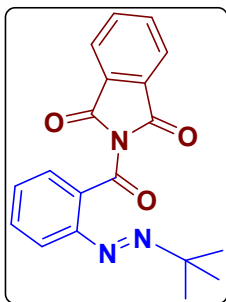

**(E)-2-(2-(tert-butylidiazenyl)benzoyl)isoindoline-1,3-dione (3m):** Yellow solid (81%, 67.86 mg);  $R_f = 0.50$  (PE/EA = 75:25), M.p. 161-163 °C;  $^1\text{H NMR}$  (400 MHz,  $\text{CDCl}_3$ ):  $\delta$  7.92-7.89 (m, 1H), 7.86-7.73 (m, 3H), 7.67 (d,  $J = 7.6$  Hz, 1H), 7.63-7.59 (m, 1H), 7.55 (t,  $J = 8.0$  Hz, 2H), 0.99 (s, 9H);  $^{13}\text{C}\{^1\text{H}\}$  NMR (100 MHz,  $\text{CDCl}_3$ ):  $\delta$  166.4, 164.7, 149.1, 135.5, 134.4, 132.4, 130.4, 129.4, 124.4, 123.6, 118.3, 68.6, 26.6; HRMS (ESI-TOF)  $m/z$ :  $[\text{M} + \text{H}]^+$  Calcd for  $[\text{C}_{19}\text{H}_{18}\text{N}_3\text{O}_3]^+$ : 336.1343; found: 336.1288.

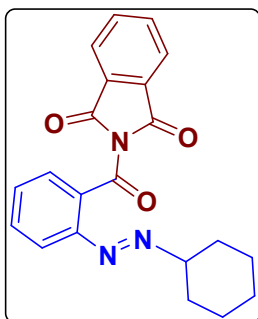

**(E)-2-(2-(cyclohexyldiazenyl)benzoyl)isoindoline-1,3-dione (3n):** Pale orange solid (75%, 67.71 mg);  $R_f = 0.50$  (PE/EA = 75:25), M.p. 187-188 °C;  $^1\text{H NMR}$  (400 MHz,  $\text{CDCl}_3$ ):  $\delta$  7.93-7.91 (m, 1H), 7.87-7.81 (m, 3H), 7.76-7.70 (m, 2H), 7.63-7.57 (m, 1H), 7.55-7.52 (m, 1H), 3.27-3.19 (m, 1H), 1.73-1.53 (m, 3H), 1.46-1.38 (m, 4H), 1.13-1.05 (m, 3H);  $^{13}\text{C}\{^1\text{H}\}$  NMR (100 MHz,  $\text{CDCl}_3$ ):  $\delta$  168.1, 166.3, 164.9, 149.1, 135.4, 134.4, 131.5, 130.6, 129.6, 124.5, 123.7, 118.9, 76.9, 30.5, 25.4, 24.2; HRMS (ESI-TOF)  $m/z$ :  $[\text{M} + \text{H}]^+$  Calcd for  $[\text{C}_{21}\text{H}_{20}\text{N}_3\text{O}_3]^+$ : 362.1500; found: 362.1450.

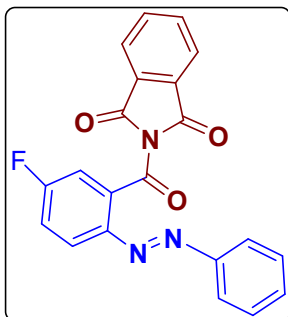

**(E)-2-(5-fluoro-2-(phenyldiazenyl)benzoyl)isoindoline-1,3-dione (3o):** Yellow solid (87%, 81.14 mg);  $R_f = 0.50$  (PE/EA = 75:25), M.p. 168-170 °C;  $^1\text{H NMR}$  (400 MHz,  $\text{CDCl}_3$ ):  $\delta$  7.91-7.87 (m, 1H), 7.85-7.82 (m, 2H), 7.76-7.72 (m, 2H), 7.51 (d,  $J = 7.6$  Hz, 2H), 7.45-7.43 (m, 1H), 7.38-7.32 (m, 1H), 7.29 (d,  $J = 7.2$  Hz, 1H), 7.24-7.20 (m, 2H);  $^{13}\text{C}\{^1\text{H}\}$  NMR (100 MHz,  $\text{CDCl}_3$ ):  $\delta$  165.2, 164.6, 163.8 (C-F,  $^1J_{\text{C-F}} = 230.0$  Hz), 151.8, 146.1, 135.5, 133.8 (C-F,  $^3J_{\text{C-F}} = 8.0$  Hz), 131.7, 131.2, 129.0, 124.5, 122.9, 121.6 (C-F,  $^3J_{\text{C-F}} = 9.0$  Hz), 119.3 (C-F,

$^2J_{\text{C-F}} = 23.0$  Hz), 116.7 (C-F,  $^2J_{\text{C-F}} = 24.0$  Hz); HRMS (ESI-TOF)  $m/z$ :  $[\text{M} + \text{H}]^+$  Calcd for  $[\text{C}_{21}\text{H}_{13}\text{FN}_3\text{O}_3]^+$ : 374.0936; found: 374.0894.

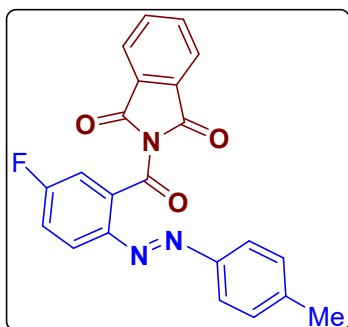

**(E)-2-(5-fluoro-2-(p-tolyldiazenyl)benzoyl)isoindoline-1,3-dione (3p):** Yellow solid (82%, 79.35mg);  $R_f = 0.50$  (PE/Ea=76:24), M.p. 160-162 °C;  $^1\text{H}$  NMR (400 MHz,  $\text{CDCl}_3$ ):  $\delta$  7.89-7.82 (m, 3H), 7.76-7.72 (m, 2H), 7.44-7.39 (m, 3H), 7.36-7.31 (m, 1H), 7.01 (d,  $J = 8.0$  Hz, 2H), 2.29 (s, 3H);  $^{13}\text{C}\{^1\text{H}\}$  NMR (100 MHz,  $\text{CDCl}_3$ ):  $\delta$  165.1, 164.6, 163.8 (C-F,  $^1J_{\text{C-F}} = 253.0$  Hz), 150.0, 146.3, 142.6, 135.5, 133.5 (C-F,  $^3J_{\text{C-F}} = 9.0$  Hz), 131.3, 129.7, 124.5, 122.9, 121.6 (C-F,  $^3J_{\text{C-F}} = 8.0$  Hz), 119.3 (C-F,  $^2J_{\text{C-F}} = 23.0$  Hz), 116.7 (C-F,  $^2J_{\text{C-F}} = 25.0$  Hz), 21.5; HRMS (ESI-TOF)  $m/z$ :  $[\text{M} + \text{H}]^+$  Calcd for  $[\text{C}_{22}\text{H}_{15}\text{FN}_3\text{O}_3]^+$ : 388.1092; found: 388.1037.

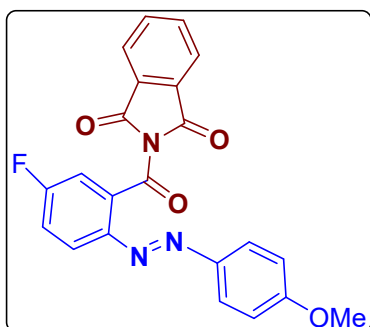

**(E)-2-(5-fluoro-2-((4-methoxyphenyl)diazenyl)benzoyl)isoindoline-1,3-dione (3q):** Orange solid (85%, 85.6 mg);  $R_f = 0.50$  (PE/Ea=74:26), M.p. 188-189 °C;  $^1\text{H}$  NMR (400 MHz,  $\text{CDCl}_3$ ):  $\delta$  7.86-7.81 (m, 3H), 7.76-7.73 (m, 2H), 7.49 (d,  $J = 8.8$  Hz, 2H), 7.43-7.40 (m, 1H), 7.35-7.30 (m, 1H), 6.70 (d,  $J = 9.2$  Hz, 2H), 3.78 (s, 3H);  $^{13}\text{C}\{^1\text{H}\}$  NMR (100 MHz,  $\text{CDCl}_3$ ):  $\delta$  165.1, 164.6, 163.5 (C-F,  $^1J_{\text{C-F}} = 252.0$  Hz), 162.6, 146.4, 146.3, 135.5, 133.0 (C-F,  $^3J_{\text{C-F}} = 8.0$  Hz), 131.2, 125.0, 124.5, 121.6 (C-F,  $^3J_{\text{C-F}} = 9.0$  Hz), 119.3 (C-F,  $^2J_{\text{C-F}} = 23.0$  Hz), 116.7 (C-F,  $^2J_{\text{C-F}} = 25.0$  Hz), 114.1, 55.6; HRMS (ESI-TOF)  $m/z$ :  $[\text{M} + \text{H}]^+$  Calcd for  $[\text{C}_{22}\text{H}_{15}\text{FN}_3\text{O}_4]^+$ : 404.1042; found: 404.1055.

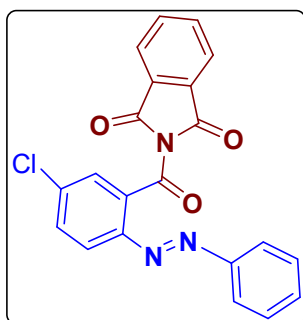

**(E)-2-(5-chloro-2-(phenyldiazenyl)benzoyl)isoindoline-1,3-dione (3r):** Orange-red solid (81%, 78.8 mg);  $R_f = 0.50$  (PE/EA = 78:22), M.p. 152-155 °C;  $^1\text{H NMR}$  (400 MHz,  $\text{CDCl}_3$ ):  $\delta$  7.83-7.79 (m, 3H), 7.75-7.70 (m, 3H), 7.62-7.59 (m, 1H), 7.51-7.49 (m, 2H), 7.30 (t,  $J = 7.2$  Hz, 1H), 7.21 (t,  $J = 8.0$  Hz, 2H);  $^{13}\text{C}\{^1\text{H}\}$  NMR (100 MHz,  $\text{CDCl}_3$ ):  $\delta$  164.9, 164.6, 151.7, 147.9, 137.3, 135.6, 133.0, 132.3, 132.0, 131.1, 129.6, 129.0, 124.5, 123.0, 120.7; HRMS (ESI-TOF)  $m/z$ :  $[\text{M} + \text{H}]^+$  Calcd for  $[\text{C}_{21}\text{H}_{13}\text{ClN}_3\text{O}_3]^+$ : 390.0640; found: 390.0663.

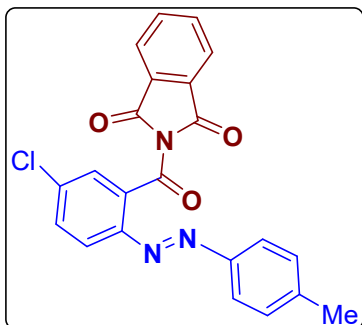

**(E)-2-(5-chloro-2-(p-tolyldiazenyl)benzoyl)isoindoline-1,3-dione (3s):** Yellow solid (59%, 59.4 mg);  $R_f = 0.50$  (PE/EA=77:23), M.p. 165-166°C;  $^1\text{H NMR}$  (400 MHz,  $\text{CDCl}_3$ ):  $\delta$  7.88-7.83 (m, 2H), 7.80 (d,  $J = 8.8$  Hz, 1H), 7.77-7.73 (m, 2H), 7.70 (d,  $J = 2.4$  Hz, 1H), 7.63-7.60 (m, 1H), 7.42 (d,  $J = 8.4$  Hz, 2H), 7.02 (d,  $J = 8.4$  Hz, 2H), 2.30 (s, 3H);  $^{13}\text{C}\{^1\text{H}\}$  NMR (100 MHz,  $\text{CDCl}_3$ ):  $\delta$  165.1, 164.7, 150.0, 148.1, 142.9, 137.0, 135.5, 132.8, 132.4, 131.2, 129.76, 129.70, 124.6, 123.1, 120.8, 21.6; HRMS (ESI-TOF)  $m/z$ :  $[\text{M} + \text{H}]^+$  Calcd for  $[\text{C}_{22}\text{H}_{15}\text{ClN}_3\text{O}_3]^+$ : 404.0797; found: 404.0778.

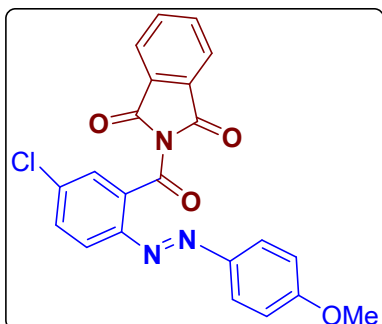

**(E)-2-(5-chloro-2-((4-methoxyphenyl)diazenyl)benzoyl)isoindoline-1,3-dione (3t):** Dark orange solid (76%, 79.6 mg);  $R_f = 0.50$  (PE/EA=76:24), mp. 180-181 °C;  $^1\text{H NMR}$  (400 MHz,  $\text{CDCl}_3$ ):  $\delta$  7.85-7.82 (m, 2H), 7.79-7.73 (m, 3H), 7.69 (d,  $J = 2.0$  Hz, 1H), 7.61-7.59 (m, 1H), 7.50 (d,  $J = 9.2$  Hz, 2H), 6.71 (d,  $J = 9.2$  Hz, 2H), 3.79 (s, 3H);  $^{13}\text{C}\{^1\text{H}\}$  NMR (100 MHz,  $\text{CDCl}_3$ ):  $\delta$  165.2, 164.6, 162.8, 148.3, 146.2, 136.4, 135.5, 132.43, 132.40, 131.2, 129.7, 125.2, 124.5, 120.9, 114.2, 55.6; HRMS (ESI-TOF)  $m/z$ :  $[\text{M} + \text{H}]^+$  Calcd for  $[\text{C}_{22}\text{H}_{15}\text{ClN}_3\text{O}_4]^+$ : 420.0746; found: 420.0778.

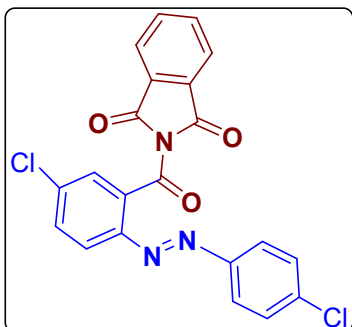

**(E)-2-(5-chloro-2-((4-chlorophenyl)diazenyl)benzoyl)isoindoline-1,3-dione (3u):** Orange solid (77%, 81.5 mg);  $R_f = 0.50$  (PE/EA = 76:24), M.p. 209-210 °C;  $^1\text{H NMR}$  (400 MHz,  $\text{CDCl}_3$ ):  $\delta$  7.86-7.83 (m, 2H), 7.82-7.76 (m, 3H), 7.70 (d,  $J = 2.0$  Hz, 1H), 7.64-7.61 (m, 1H), 7.49-7.46 (m, 2H), 7.25-7.20 (m, 2H);  $^{13}\text{C}\{^1\text{H}\}$  NMR (100 MHz,  $\text{CDCl}_3$ ):  $\delta$  164.8, 164.6, 150.2, 147.8, 138.1, 137.6, 135.7, 133.1, 132.4, 131.1, 129.7, 129.4, 124.6, 124.2, 120.8; HRMS (ESI-TOF)  $m/z$ :  $[\text{M} + \text{H}]^+$  Calcd for  $[\text{C}_{21}\text{H}_{12}\text{Cl}_2\text{N}_3\text{O}_3]^+$ : 424.0251; found: 424.0201.

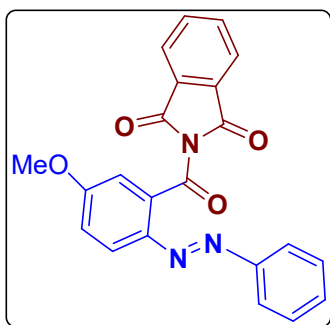

**(E)-2-(5-methoxy-2-(phenyldiazenyl)benzoyl)isoindoline-1,3-dione (3v):** Orange solid (63%, 60.6 mg);  $R_f = 0.50$  (PE/EA = 73:27), M.p. 161-162 °C;  $^1\text{H NMR}$  (400 MHz,  $\text{CDCl}_3$ ):  $\delta$  7.87 (d,  $J = 8.8$  Hz, 1H), 7.84-7.81 (m, 2H), 7.74-7.71 (m, 2H), 7.46 (d,  $J = 7.6$  Hz, 2H), 7.27-7.23 (m, 2H), 7.21-7.16 (m, 3H), 3.95 (s, 3H);  $^{13}\text{C}\{^1\text{H}\}$  NMR (100 MHz,  $\text{CDCl}_3$ ):  $\delta$  166.2, 164.8, 162.0, 152.0, 143.8, 135.4, 133.6, 131.3, 131.0, 128.9, 124.5, 122.6, 121.1, 118.4, 114.1, 56.0; HRMS (ESI-TOF)  $m/z$ :  $[\text{M} + \text{H}]^+$  Calcd for  $[\text{C}_{22}\text{H}_{16}\text{N}_3\text{O}_4]^+$ : 386.1136; found: 386.1118.

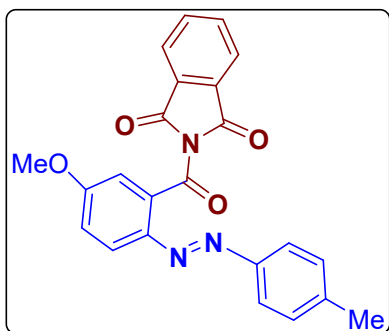

**(E)-2-(5-methoxy-2-(p-tolyldiazenyl)benzoyl)isoindoline-1,3-dione (3w):** Orange solid (65%, 64.8 mg);  $R_f = 0.50$  (PE/EA = 75:25), M.p. 109-110 °C;  $^1\text{H NMR}$  (400 MHz,  $\text{CDCl}_3$ ):  $\delta$  7.86-7.82 (m, 3H), 7.75-7.72 (m, 2H), 7.37 (d,  $J = 8.0$  Hz, 2H), 7.22 (d,  $J = 2.8$  Hz, 1H), 7.18-7.15 (m, 1H), 6.98 (d,  $J = 8.0$  Hz, 2H), 3.94 (s, 3H), 2.28 (s, 3H);  $^{13}\text{C}\{^1\text{H}\}$  NMR (100 MHz,  $\text{CDCl}_3$ ):  $\delta$  166.3, 164.8, 161.8, 150.2, 144.0, 141.7, 135.3, 133.3, 131.4, 129.5, 124.5, 122.6,

121.1, 118.4, 114.0, 56.0, 21.5; HRMS (ESI-TOF)  $m/z$ :  $[M + H]^+$  Calcd for  $[C_{23}H_{18}N_3O_4]^+$ : 400.1292; found: 400.1308.

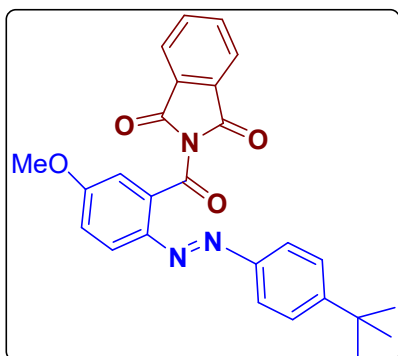

**(E)-2-(2-((4-(tert-butyl)phenyl)diazenyl)-5-methoxybenzoyl)isoindoline-1,3-dione (3x):** Dark orange solid (86%, 94.85 mg);  $R_f = 0.50$  (PE/EA=78:22), M.p. 169-170 °C;  $^1H$  NMR (400 MHz,  $CDCl_3$ ):  $\delta$  7.74-7.68 (m, 3H), 7.60-7.57 (m, 2H), 7.29 (d,  $J = 8.8$  Hz, 2H), 7.15-7.13 (m, 1H), 7.10-7.04 (m, 3H), 3.83 (s, 3H), 1.14 (s, 9H);  $^{13}C\{^1H\}$  NMR (100 MHz,  $CDCl_3$ ):  $\delta$  166.2, 164.8, 161.7, 154.6, 150.0, 144.1, 135.2, 133.2, 131.4, 125.7, 124.4, 122.3, 121.0, 118.3, 114.1, 55.9, 34.9, 31.1; HRMS (ESI-TOF)  $m/z$ :  $[M + H]^+$  Calcd for  $[C_{26}H_{24}N_3O_4]^+$ : 442.1762; found: 442.1751.

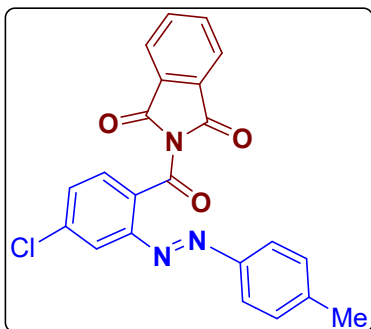

**(E)-2-(4-chloro-2-(p-tolyldiazenyl)benzoyl)isoindoline-1,3-dione (3y):** Yellow solid (67%, 67.5 mg);  $R_f = 0.50$  (PE/EA=71:29), M.p. 180-182 °C;  $^1H$  NMR (400 MHz,  $CDCl_3$ ):  $\delta$  7.85-7.83 (m, 2H), 7.79 (d,  $J = 2.0$  Hz, 1H), 7.76-7.73 (m, 3H), 7.58-7.55 (m, 1H), 7.40 (d,  $J = 8.0$  Hz, 2H), 7.00 (d,  $J = 8.4$  Hz, 2H), 2.30 (s, 3H);  $^{13}C\{^1H\}$  NMR (100 MHz,  $CDCl_3$ ):  $\delta$  165.4, 164.7, 150.5, 150.0, 143.2, 139.0, 135.4, 131.35, 131.32, 130.7, 130.4, 129.7, 124.5, 123.2, 118.5, 21.6; HRMS (ESI-TOF)  $m/z$ :  $[M + H]^+$  Calcd for  $[C_{22}H_{15}ClN_3O_3]^+$ : 404.0797; found: 404.0789.

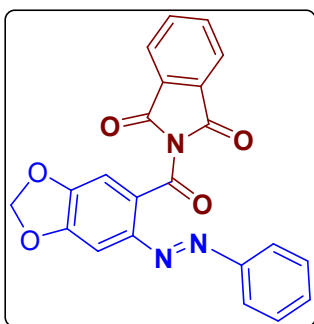

**(E)-2-(6-(phenyldiazenyl)benzo[d][1,3]dioxole-5-carbonyl)isoindoline-1,3dione (3z):** Orange solid (69%, 68.8 mg);  $R_f = 0.50$  (PE/EA = 70:30), M.p. 210-215 °C;  $^1\text{H NMR}$  (400 MHz,  $\text{CDCl}_3$ ):  $\delta$  7.84-7.82 (m, 2H), 7.72-7.70 (m, 2H), 7.39 (d,  $J = 7.2$  Hz, 2H), 7.33 (s, 1H), 7.27-7.22 (m, 2H), 7.14 (t,  $J = 7.6$  Hz, 2H), 6.15 (s, 2H);  $^{13}\text{C}\{^1\text{H}\}$  NMR (100 MHz,  $\text{CDCl}_3$ ):  $\delta$  165.5, 164.9, 152.0, 151.8, 150.4, 146.8, 135.3, 131.5, 131.2, 129.2, 128.9, 124.4, 122.7, 109.4, 102.9, 96.6; HRMS (ESI-TOF)  $m/z$ :  $[\text{M} + \text{H}]^+$  Calcd for  $[\text{C}_{22}\text{H}_{14}\text{N}_3\text{O}_5]^+$ : 400.0928; found: 400.0955.

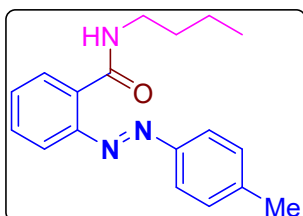

**(E)-N-butyl-2-(p-tolyldiazenyl)benzamide (4):** Dark orange solid (85%, 50.17 mg);  $R_f = 0.50$  (PE/EA = 60:40), M.p. 183-184 °C;  $^1\text{H NMR}$  (400 MHz,  $\text{CDCl}_3$ ):  $\delta$  9.06 (s, 1H), 7.87 (d,  $J = 8.8$  Hz, 1H), 7.62 (d,  $J = 8.0$  Hz, 2H), 7.57 (d,  $J = 2.0$  Hz, 1H), 7.29 (d,  $J = 8.0$  Hz, 2H), 6.74-6.71 (m, 1H), 6.11 (s, 1H), 3.26 (t,  $J = 7.2$  Hz, 2H), 2.43 (s, 3H), 1.68-1.61 (m, 2H), 1.49-1.39 (m, 2H), 0.96 (t,  $J = 7.2$  Hz, 3H);  $^{13}\text{C}\{^1\text{H}\}$  NMR (100 MHz,  $\text{CDCl}_3$ ):  $\delta$  168.4, 151.2, 151.0, 141.4, 140.9, 132.3, 130.0, 122.5, 117.9, 115.2, 113.8, 43.2, 31.4, 21.5, 20.2, 13.9; HRMS (ESI-TOF)  $m/z$ :  $[\text{M} + \text{H}]^+$  Calcd for  $[\text{C}_{18}\text{H}_{22}\text{N}_3\text{O}]^+$ : 296.1758; found: 296.1783.

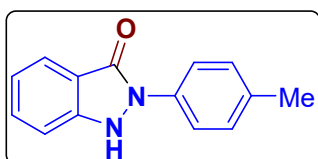

**2-(p-tolyl)-1,2-dihydro-3H-indazol-3-one (5):** White yellowish solid (61%, 27.34 mg);  $R_f = 0.50$  (PE/EA = 82:18), M.p. 196-197 °C;  $^1\text{H NMR}$  (400 MHz,  $\text{CDCl}_3$ ):  $\delta$  7.84 (d,  $J = 7.6$  Hz, 1H), 7.69 (d,  $J = 8.0$  Hz, 2H), 7.54 (t,  $J = 7.6$  Hz, 1H), 7.49 (s, 1H), 7.27 (d,  $J = 9.2$  Hz, 1H), 7.24-7.18 (m, 3H), 2.33 (s, 3H);  $^{13}\text{C}\{^1\text{H}\}$  NMR (100 MHz,  $\text{CDCl}_3$ ):  $\delta$  161.3, 146.7, 135.6, 134.9, 132.5, 129.9, 124.4, 123.3, 120.2, 120.0, 112.8, 21.2; HRMS (ESI-TOF)  $m/z$ :  $[\text{M} + \text{H}]^+$  Calcd for  $[\text{C}_{14}\text{H}_{13}\text{N}_2\text{O}]^+$ : 225.1023; found: 225.1002.

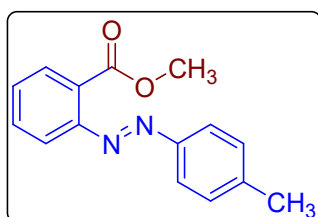

**Methyl(E)-2-(p-tolyldiazenyl)benzoate (6):** Dark orange solid (68%, 34.55 mg);  $R_f = 0.50$  (PE/EA = 84 : 16), M.p. 172-175 °C;  $^1\text{H NMR}$  (400 MHz,  $\text{CDCl}_3$ ):  $\delta$  7.84-7.80 (m, 3H), 7.63-7.56 (m, 2H), 7.49-7.45 (m, 1H), 7.31 (d,  $J = 8.4$  Hz, 2H), 3.90 (s, 3H), 2.43 (s, 3H);  $^{13}\text{C}\{^1\text{H}\}$  NMR (100 MHz,  $\text{CDCl}_3$ ):  $\delta$  168.1, 152.1, 150.8, 142.2, 132.0, 129.9, 129.8, 129.6, 128.4, 123.3, 119.0, 52.5, 21.6; HRMS (ESI-TOF)  $m/z$ :  $[\text{M} + \text{H}]^+$  Calcd for  $[\text{C}_{15}\text{H}_{15}\text{N}_2\text{O}_2]^+$ : 255.1129; found: 255.1098.

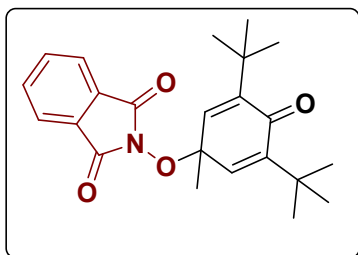

**2-((2,6-di-tert-butyl-1-methyl-4-oxocyclohexa-2,5-dien-1-yl)oxy)isoindoline-1,3-dione (7):** Lime greenish solid (85%, 81mg);  $R_f = 0.50$  (PE/EA = 90:10), M.p. 181-182 °C;  $^1\text{H}$  NMR (400 MHz,  $\text{CDCl}_3$ ):  $\delta$  7.75-7.73 (m, 2H), 7.72-7.68 (m, 2H), 6.74 (s, 2H), 1.69 (s, 3H), 1.12 (s, 18H);  $^{13}\text{C}\{^1\text{H}\}$  NMR (100 MHz,  $\text{CDCl}_3$ ):  $\delta$  185.7, 164.5, 148.9, 138.6, 134.7, 128.6, 123.4, 83.0, 34.8, 29.1, 24.2; HRMS (ESI-TOF)  $m/z$ :  $[\text{M} + \text{K}]^+$  Calcd for  $[\text{C}_{23}\text{H}_{27}\text{NO}_4\text{K}]^+$ : 420.1572; found: 420.1559.

## 8. References:

- (1) (a) M. R. Kumar, A. Park, N. Park and S. Lee, *Org. Lett.*, 2011, **13**, 3542–3545.  
(b) G. Bogonda, H. Y. Kim and K. Oh, *Org. Lett.*, 2018, **20**, 2711–2715.
- (2) D. Maiti, K. Mahanty and S. De Sarkar, *Org. Lett.*, 2021, **23**, 1742–1747.
- (3) S. Bhattacharjee and A. Hajra, *Org. Lett.*, 2023, **25**, 4183–4187.
- (4) F. Péron, C. Fossey, T. Cailly and F. Fabis, *Org. Lett.*, 2012, **14**, 1827–1829.
- (5) (a) P. Ghosh and A. Hajra, *J. Org. Chem.*, 2021, **86**, 10883–10888.  
(b) S. Laru, S. Bhattacharjee and A. Hajra, *Chem. Commun.*, 2022, **58**, 13604–13607.
- (6) K. K. Das and A. Hajra, *Chem. Commun.*, 2024, **60**, 10402–10405.

## 9. NMR Spectra for the Synthesized Products

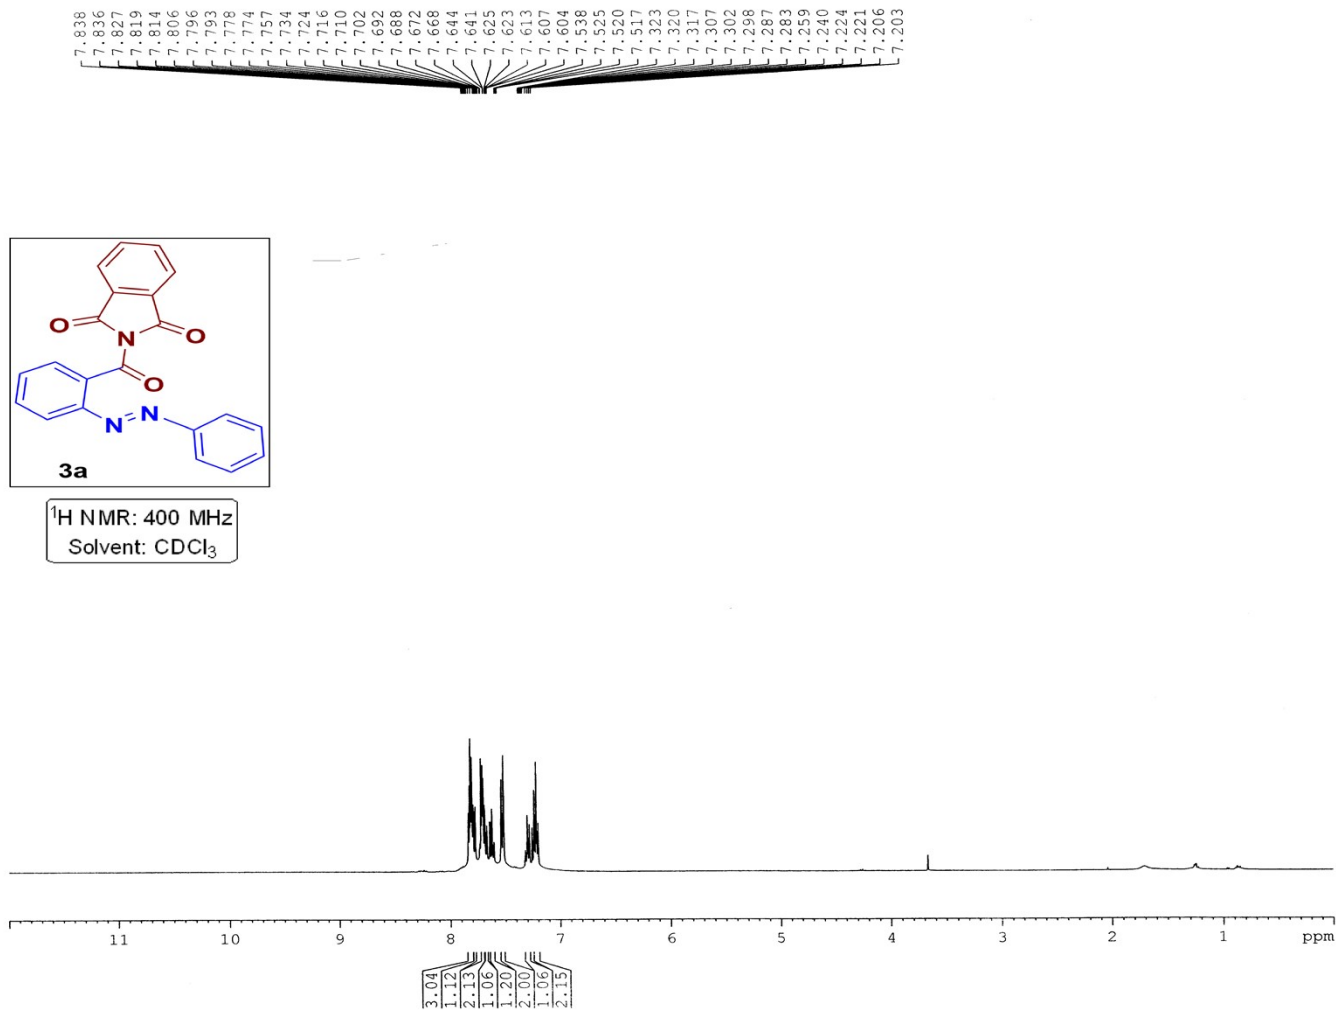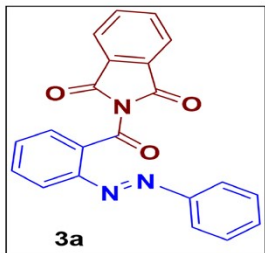

<sup>1</sup>H NMR: 400 MHz  
Solvent: CDCl<sub>3</sub>

Current Data Parameters  
NAME Dr. A HAJRA 2025 1H  
EXPNO 110  
PROCNO 1

F2 - Acquisition Parameters  
Date\_ 20250214  
Time 20.17  
INSTRUM spect  
PROBHD 5 mm PABBO BB/  
PULPROG zg30  
TD 32768  
SOLVENT CDCl3  
NS 8  
DS 2  
SWH 8223.685 Hz  
FIDRES 0.250967 Hz  
AQ 1.9922944 sec  
RG 77.59  
DW 60.800 usec  
DE 6.50 usec  
TE 292.3 K  
D1 1.00000000 sec  
TD0 1

==== CHANNEL f1 =====  
SF01 400.1524711 MHz  
NUC1 1H  
P1 14.75 usec  
PLW1 12.00000000 W

F2 - Processing parameters  
SI 16384  
SF 400.1500097 MHz  
WDW EM  
SSB 0  
LB 0.30 Hz  
GB 0  
PC 1.00

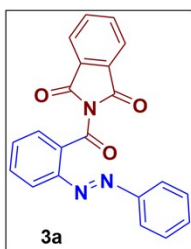

<sup>13</sup>C NMR : 100 MHz  
Solvent: CDCl<sub>3</sub>

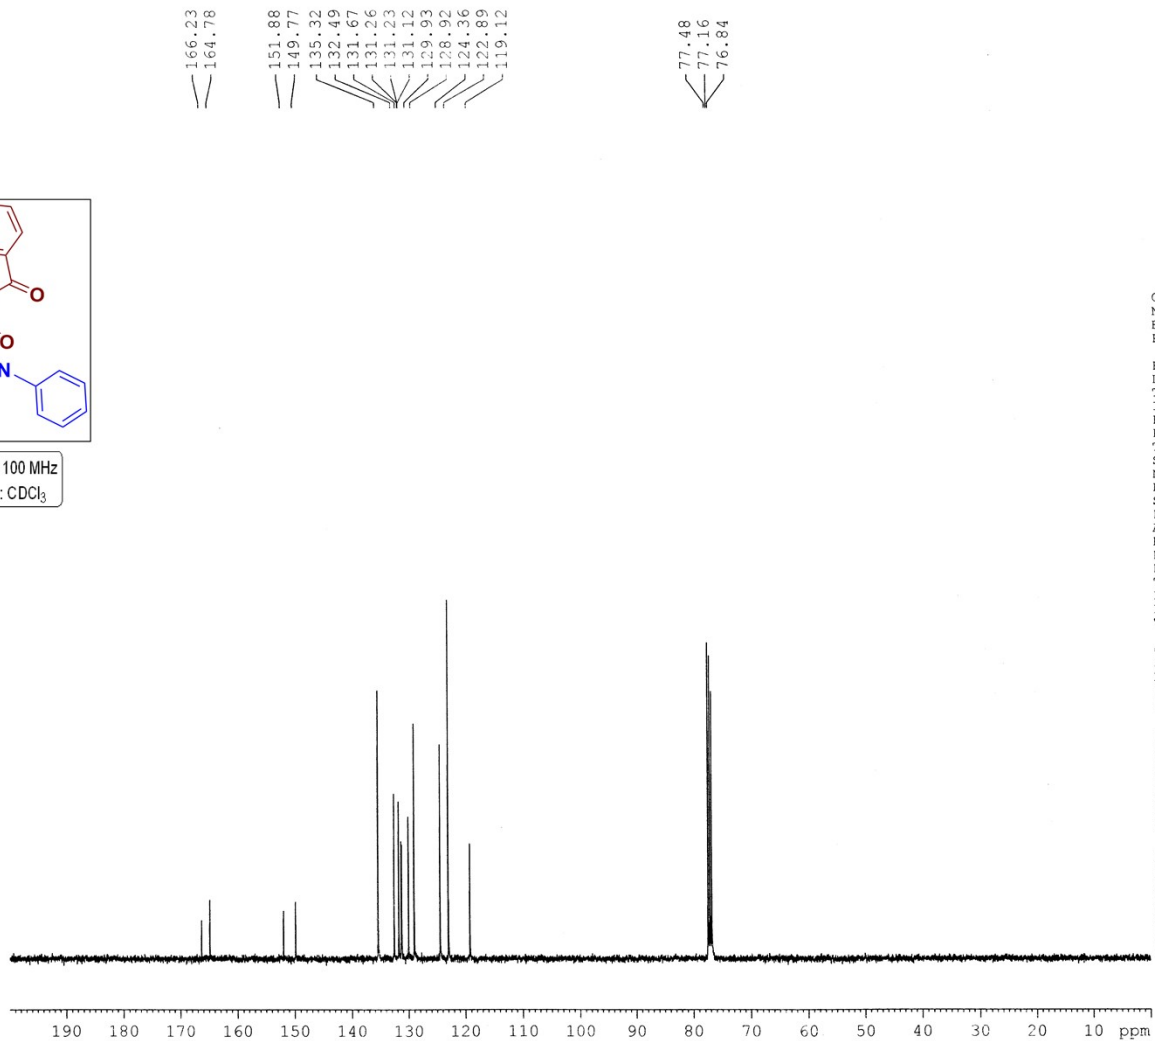

Current Data Parameters  
NAME Dr. A HAJRA-2025-13C  
EXPNO 63  
PROCNO 1

F2 - Acquisition Parameters  
Date\_ 20250214  
Time 20.34  
INSTRUM spect  
PROBHD 5 mm PABBO BB/  
PULPROG zgpg30  
TD 32768  
SOLVENT CDCl<sub>3</sub>  
NS 340  
DS 2  
SWH 24038.461 Hz  
FIDRES 0.733596 Hz  
AQ 0.6815744 sec  
RG 186.42  
DW 20.800 usec  
DE 6.50 usec  
TE 293.7 K  
D1 2.0000000 sec  
D11 0.0300000 sec  
TDO 1

----- CHANNEL f1 -----  
SFO1 100.6278588 MHz  
NUC1 13C  
P1 8.90 usec  
PLW1 54.0000000 W

----- CHANNEL f2 -----  
SFO2 400.1516006 MHz  
NUC2 1H  
CPDPRG[2] waltz16  
PCPD2 90.00 usec  
PLW2 12.0000000 W  
PLW12 0.32231000 W  
PLW13 0.16212000 W

F2 - Processing parameters  
SI 16384  
SF 100.6177902 MHz  
WDW EM  
SSB 0  
LB 1.00 Hz  
GB 0  
PC 1.40

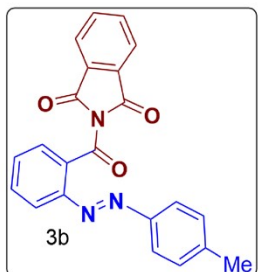

<sup>1</sup>H NMR: 400 MHz  
Solvent: CDCl<sub>3</sub>

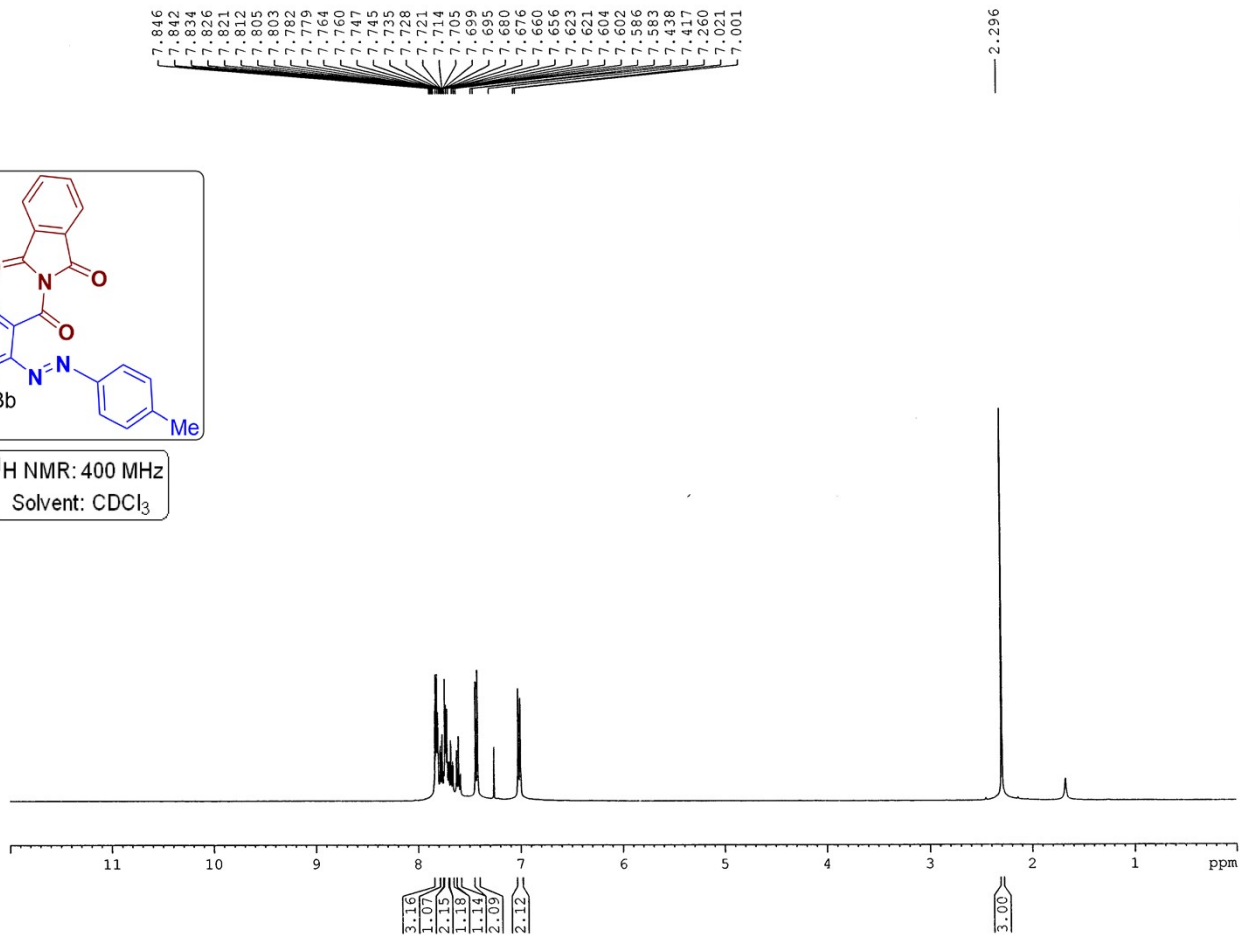

Current Data Parameters  
NAME Dr. A HAJRA 2025 1H  
EXPNO 649  
PROCNO 1

F2 - Acquisition Parameters  
Date\_ 20251105  
Time 9.39  
INSTRUM spect  
PROBHD 5 mm PABBO BB/  
PULPROG zg30  
TD 32768  
SOLVENT CDCl3  
NS 8  
DS 2  
SWH 8223.685 Hz  
FIDRES 0.250967 Hz  
AQ 1.9922944 sec  
RG 87.66  
DW 60.800 usec  
DE 6.50 usec  
TE 291.7 K  
D1 1.00000000 sec  
TD0 1

===== CHANNEL f1 =====  
SF01 400.1524711 MHz  
NUC1 1H  
P1 14.75 usec  
PLW1 12.00000000 W

F2 - Processing parameters  
SI 16384  
SF 400.1500097 MHz  
WDW EM  
SSB 0  
LB 0.30 Hz  
GB 0  
PC 1.00

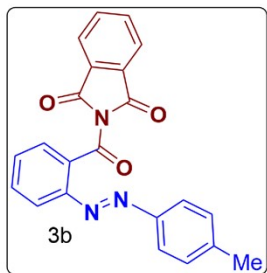

<sup>13</sup>C NMR : 100 MHz  
Solvent: CDCl<sub>3</sub>

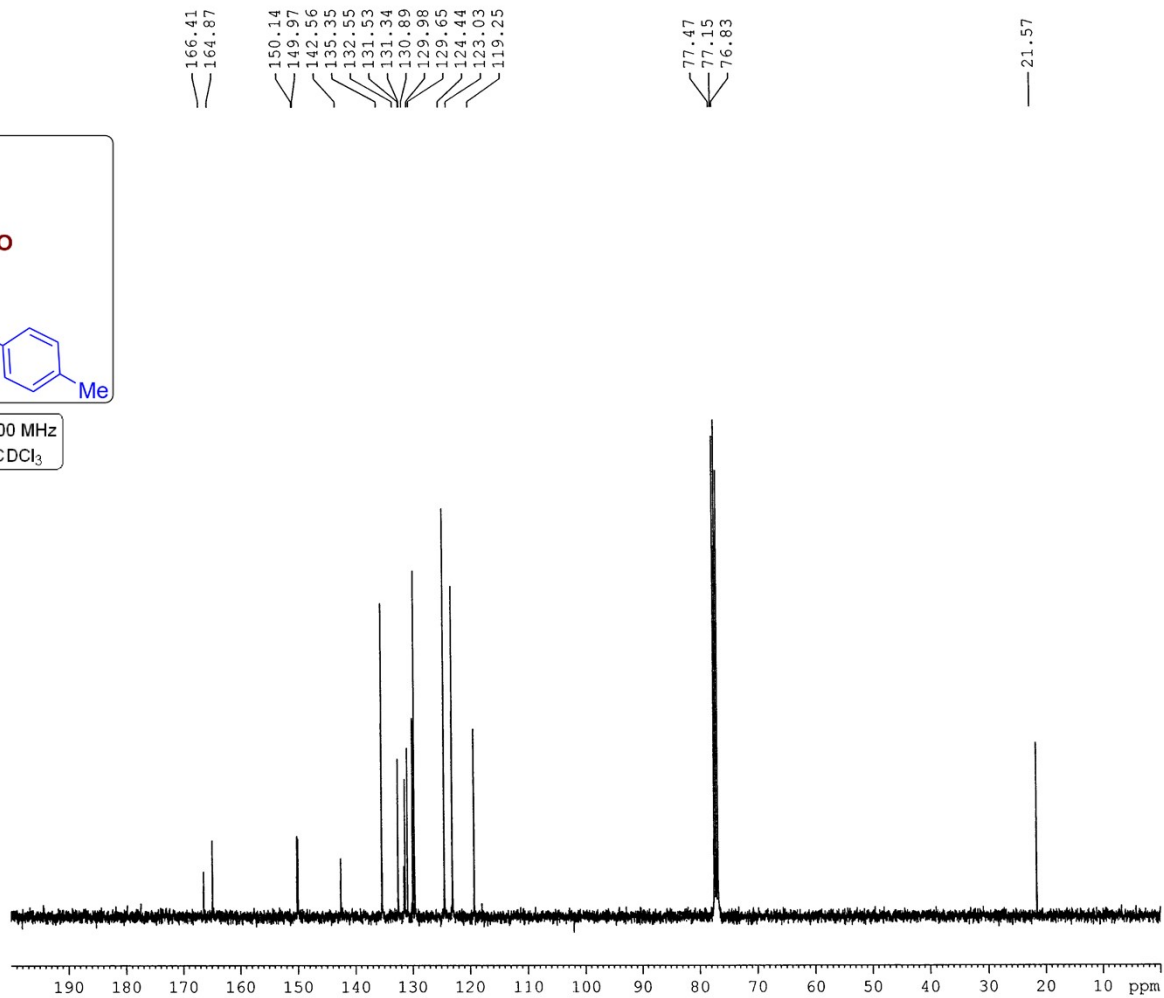

Current Data Parameters  
NAME Dr. A HAJRA-2025-13C  
EXPNO 376  
PROCNO 1

F2 - Acquisition Parameters  
Date\_ 20251105  
Time 9.51  
INSTRUM spect  
PROBHD 5 mm PABBO BB/  
PULPROG zgpg30  
TD 32768  
SOLVENT CDCl3  
NS 200  
DS 2  
SWH 24038.461 Hz  
FIDRES 0.733596 Hz  
AQ 0.6815744 sec  
RG 186.42  
DW 20.800 usec  
DE 6.50 usec  
TE 292.3 K  
D1 2.00000000 sec  
D11 0.03000000 sec  
TD0 1

===== CHANNEL f1 =====  
SFO1 100.6278588 MHz  
NUC1 13C  
P1 8.90 usec  
PLW1 54.00000000 W

===== CHANNEL f2 =====  
SFO2 400.1516006 MHz  
NUC2 1H  
CPDPRG[2] waltz16  
PCPD2 90.00 usec  
PLW2 12.00000000 W  
PLW12 0.32231000 W  
PLW13 0.16212000 W

F2 - Processing parameters  
SI 16384  
SF 100.6177903 MHz  
WDW EM  
SSB 0  
LB 1.00 Hz  
GB 0  
PC 1.40

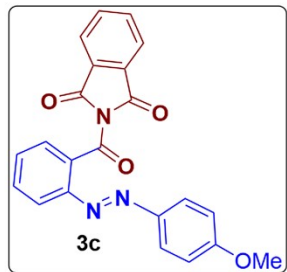

<sup>1</sup>H NMR: 400 MHz  
Solvent: CDCl<sub>3</sub>

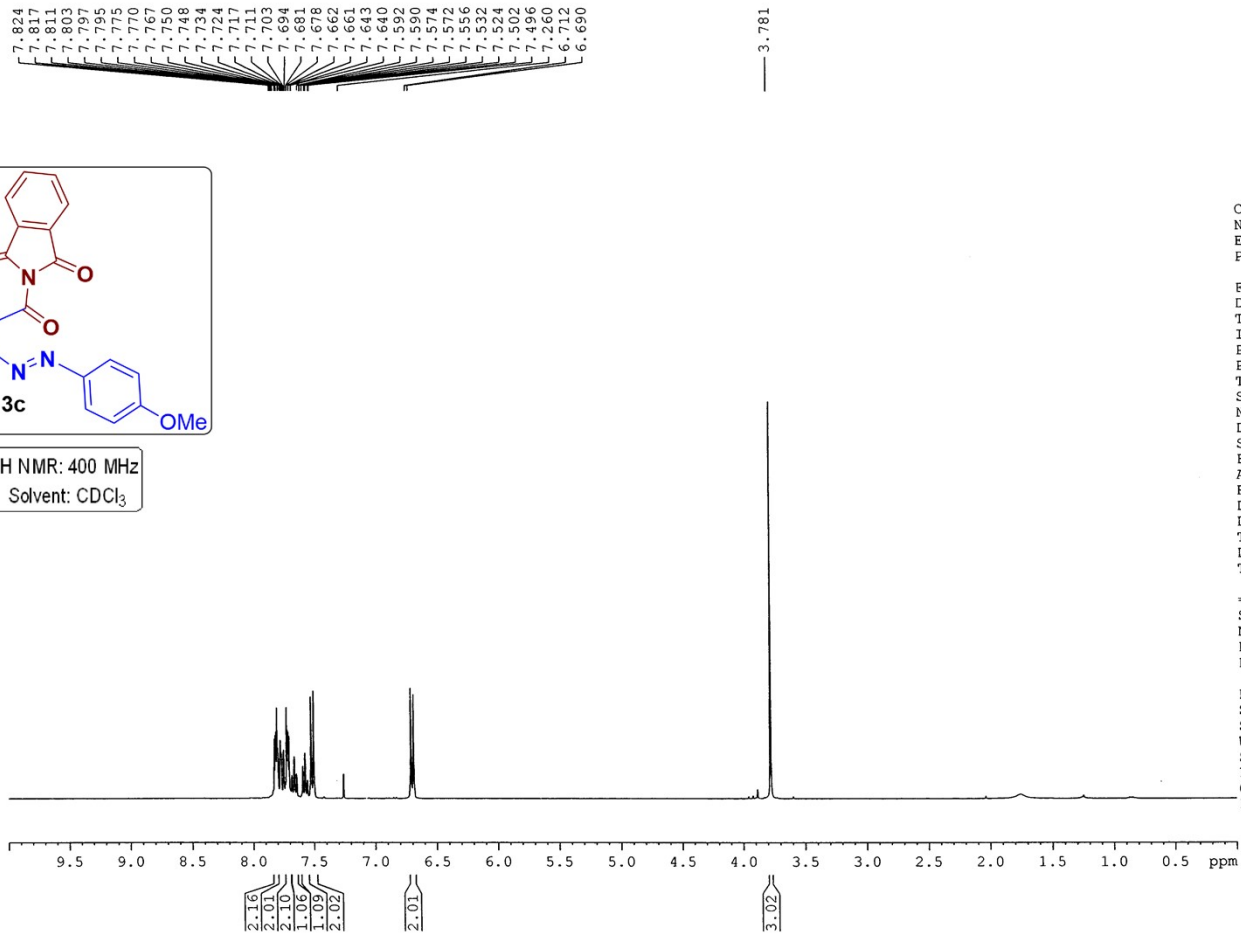

Current Data Parameters  
NAME Dr. A HAJRA 2025 1H  
EXPNO 269  
PROCNO 1

F2 - Acquisition Parameters  
Date\_ 20250510  
Time 10.42  
INSTRUM spect  
PROBHD 5 mm PABBO BB/  
PULPROG zg30  
TD 32768  
SOLVENT CDCl3  
NS 8  
DS 2  
SWH 8223.685 Hz  
FIDRES 0.250967 Hz  
AQ 1.9922944 sec  
RG 106.66  
DW 60.800 usec  
DE 6.50 usec  
TE 294.5 K  
D1 1.00000000 sec  
TD0 1

===== CHANNEL f1 =====  
SF01 400.1524711 MHz  
NUC1 1H  
P1 14.75 usec  
PLW1 12.00000000 W

F2 - Processing parameters  
SI 16384  
SF 400.1500099 MHz  
WDW EM  
SSB 0  
LB 0.30 Hz  
GB 0  
PC 1.00

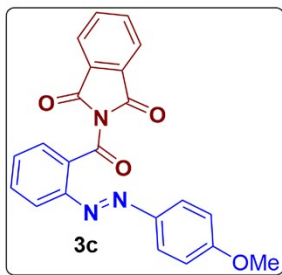

<sup>13</sup>C NMR : 100 MHz  
Solvent: CDCl<sub>3</sub>

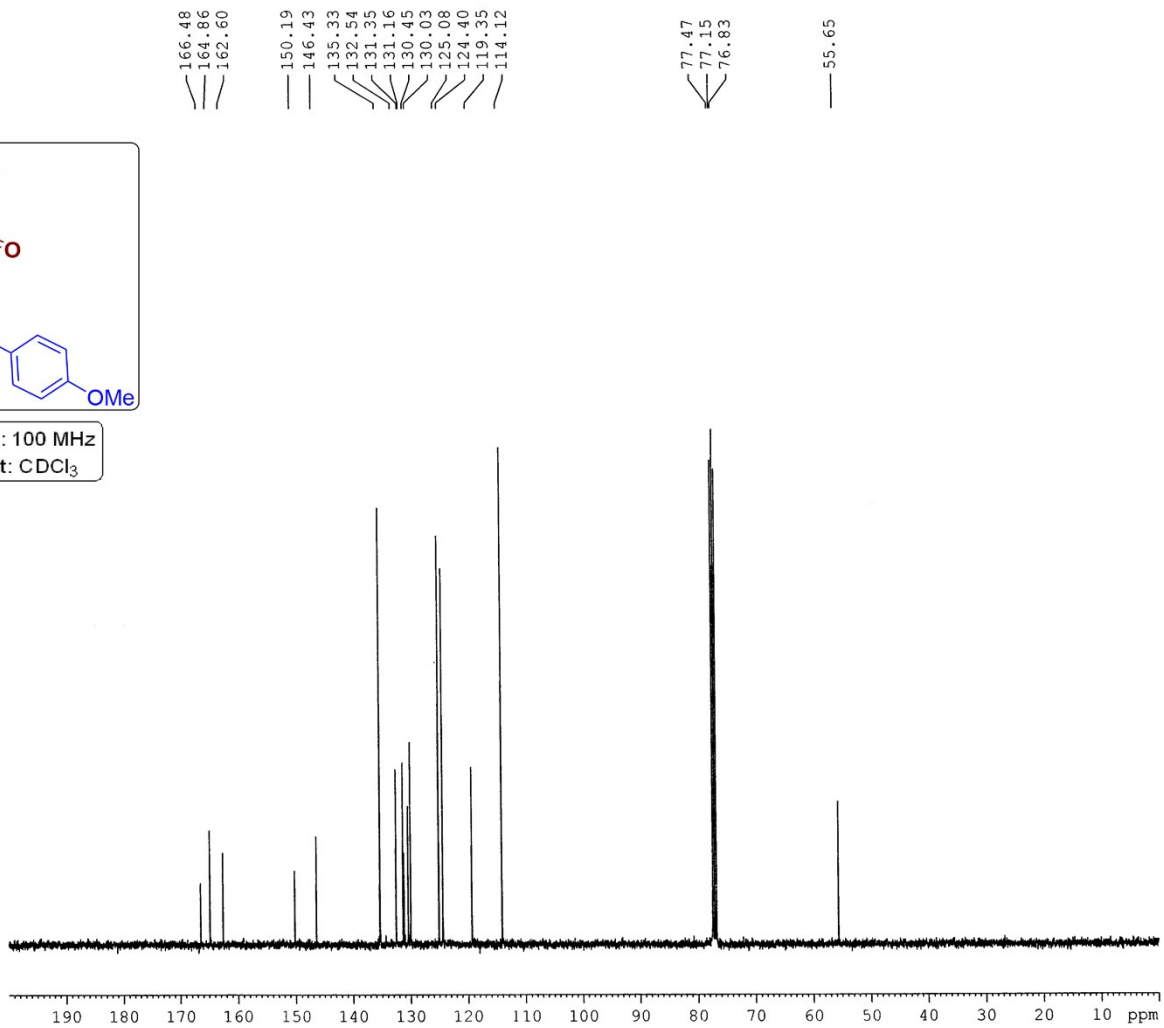

Current Data Parameters  
NAME Dr. A HAJRA-2025-13C  
EXPNO 161  
PROCNO 1

F2 - Acquisition Parameters  
Date\_ 20250510  
Time 11.01  
INSTRUM spect  
PROBHD 5 mm FABBO BB/  
PULPROG zgpg30  
TD 32768  
SOLVENT CDCl3  
NS 260  
DS 2  
SWH 24038.461 Hz  
FIDRES 0.733596 Hz  
AQ 0.6815744 sec  
RG 186.42  
DW 20.800 usec  
DE 6.50 usec  
TE 295.4 K  
D1 2.00000000 sec  
D11 0.03000000 sec  
TDO 1

----- CHANNEL f1 -----  
SFO1 100.6278598 MHz  
NUC1 13C  
P1 8.90 usec  
PLW1 54.00000000 W  
----- CHANNEL f2 -----  
SFO2 400.1516006 MHz  
NUC2 1H  
CPDPRG[2] waltz16  
PCPD2 90.00 usec  
PLW2 12.00000000 W  
PLW12 0.32231000 W  
PLW13 0.16212000 W

F2 - Processing parameters  
SI 16384  
SF 100.6177902 MHz  
WDW EM  
SSB 0  
LB 1.00 Hz  
GB 0  
PC 1.40

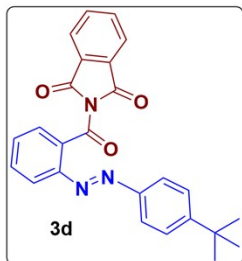

<sup>1</sup>H NMR: 400 MHz  
Solvent: CDCl<sub>3</sub>

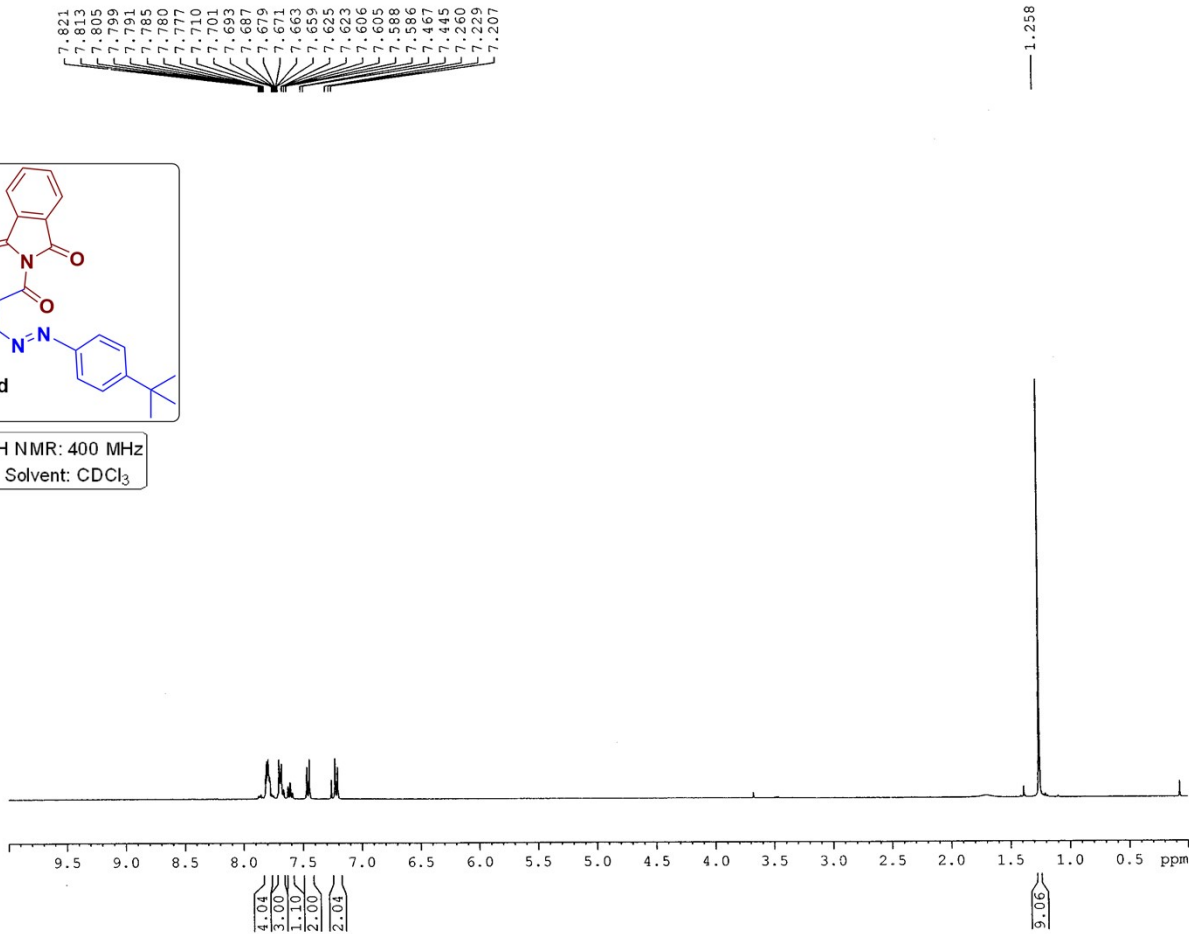

Current Data Parameters  
NAME Dr. A HAJRA 2025 1H  
EXPNO 268  
PROCNO 1

F2 - Acquisition Parameters  
Date\_ 20250510  
Time\_ 10.12  
INSTRUM spect  
PROBHD 5 mm PABBO BB/  
PULPROG zg30  
TD 32768  
SOLVENT CDCl3  
NS 8  
DS 2  
SWH 8223.685 Hz  
FIDRES 0.250967 Hz  
AQ 1.9922944 sec  
RG 106.66  
DW 60.800 usec  
DE 6.50 usec  
TE 293.5 K  
D1 1.00000000 sec  
TD0 1

===== CHANNEL f1 =====  
SFO1 400.1524711 MHz  
NUC1 1H  
P1 14.75 usec  
PLW1 12.00000000 W

F2 - Processing parameters  
SI 16384  
SF 400.1500097 MHz  
WDW EM  
SSB 0  
LB 0.30 Hz  
GB 0  
PC 1.00

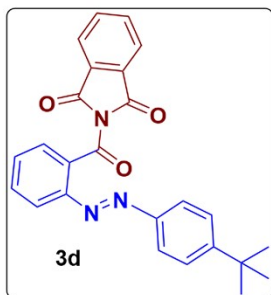

<sup>13</sup>C NMR : 100 MHz  
Solvent: CDCl<sub>3</sub>

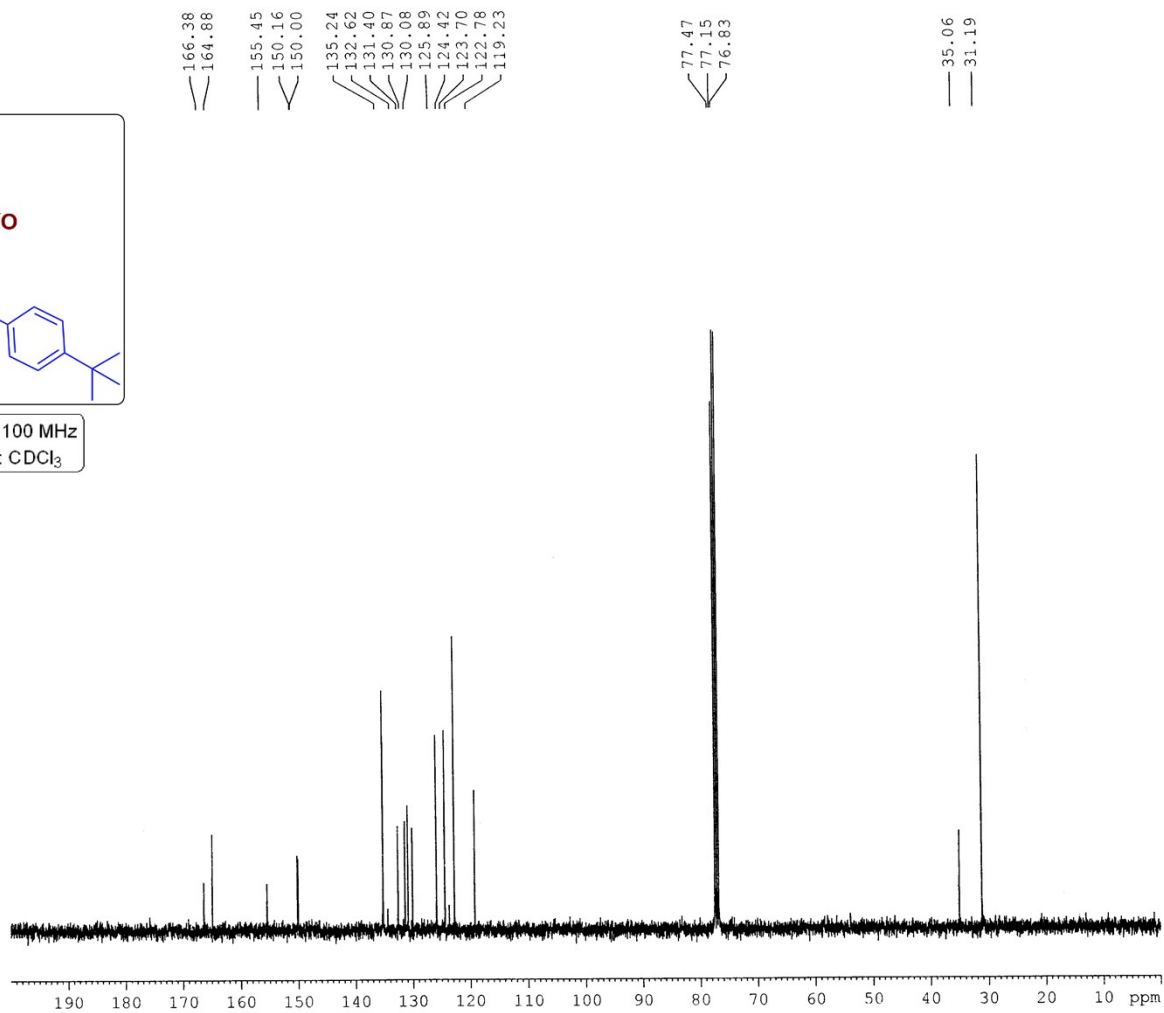

Current Data Parameters  
NAME Dr. A HAJRA-2025-13C  
EXPNO 189  
PROCNO 1

F2 - Acquisition Parameters  
Date\_ 20250604  
Time 18.51  
INSTRUM spect  
PROBHD 5 mm PABBO BB/  
PULPROG zgpg30  
TD 32768  
SOLVENT CDCl3  
NS 115  
DS 2  
SWH 24038.461 Hz  
FIDRES 0.733596 Hz  
AQ 0.6815744 sec  
RG 186.42  
DW 20.600 usec  
DE 6.50 usec  
TE 293.5 K  
D1 2.0000000 sec  
D11 0.03000000 sec  
TDO 1

===== CHANNEL f1 =====  
SFO1 100.6278588 MHz  
NUC1 13C  
P1 8.90 usec  
PLW1 54.0000000 W

===== CHANNEL f2 =====  
SFO2 400.1516006 MHz  
NUC2 1H  
CPCPRG[2] waltz16  
PCPD2 90.00 usec  
PLW2 12.00000000 W  
PLW12 0.32231000 W  
PLW13 0.16212000 W

F2 - Processing parameters  
SI 16384  
SF 100.6177888 MHz  
WDW EM  
SSB 0  
LE 1.00 Hz  
GB 0  
PC 1.40

7.856  
7.845  
7.837  
7.832  
7.824  
7.814  
7.787  
7.784  
7.765  
7.757  
7.751  
7.744  
7.714  
7.710  
7.695  
7.692  
7.676  
7.672  
7.657  
7.654  
7.638  
7.636  
7.620  
7.617  
7.617  
7.508  
7.503  
7.486  
7.260  
7.226  
7.220  
7.216  
7.202  
7.199

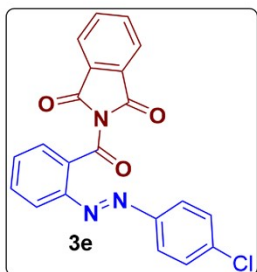

<sup>1</sup>H NMR: 400 MHz  
Solvent: CDCl<sub>3</sub>

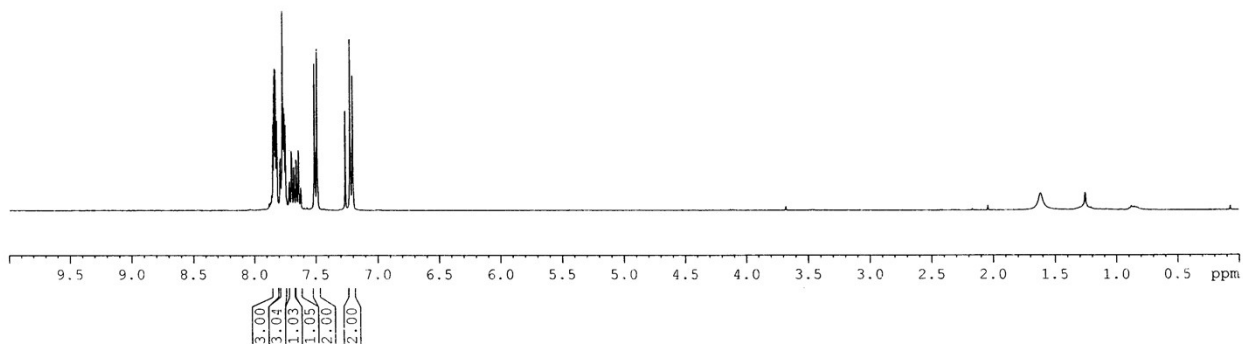

Current Data Parameters  
NAME Dr. A HAJRA 2025 1H  
EXPNO 153  
PROCNO 1

F2 - Acquisition Parameters  
Date\_ 20250306  
Time\_ 10.45  
INSTRUM spect  
PROBHD 5 mm PABBO BB/  
PULPROG zg30  
TD 32768  
SOLVENT CDCl3  
NS 8  
DS 2  
SWH 8223.685 Hz  
FIDRES 0.250967 Hz  
AQ 1.9922944 sec  
RG 135.7  
DW 60.800 usec  
DE 6.50 usec  
TE 295.7 K  
D1 1.00000000 sec  
TD0 1

==== CHANNEL f1 =====  
SFO1 400.1524711 MHz  
NUC1 1H  
P1 14.75 usec  
PLW1 12.00000000 W

F2 - Processing parameters  
SI 16384  
SF 400.1500097 MHz  
WDW EM  
SSB 0  
LB 0.30 Hz  
GB 0  
PC 1.00

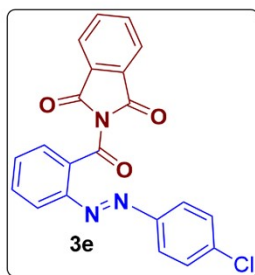

<sup>13</sup>C NMR : 100 MHz  
Solvent: CDCl<sub>3</sub>

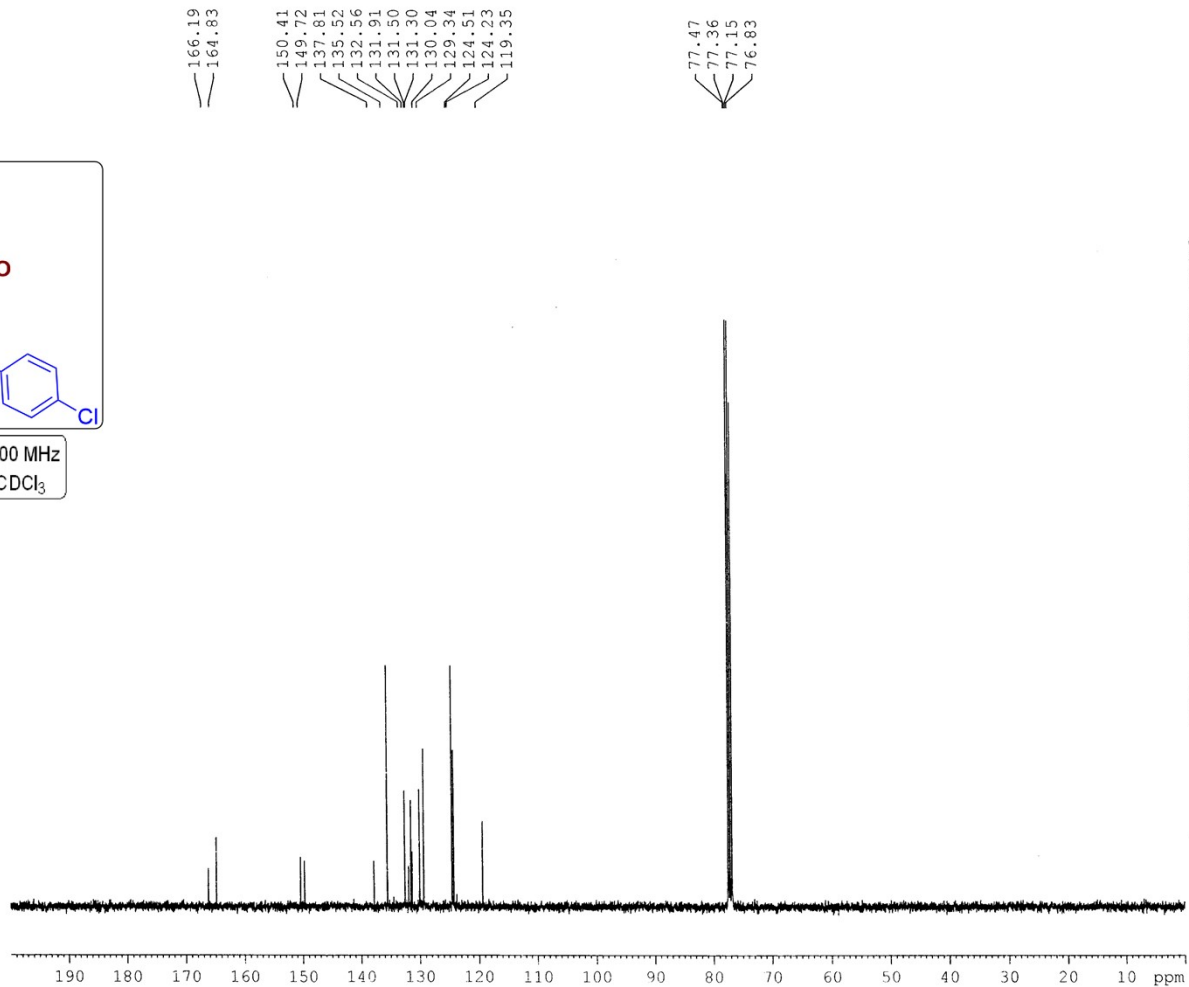

Current Data Parameters  
NAME Dr. A HAJRA-2025-13C  
EXFNO 113  
PROCNO 1

F2 - Acquisition Parameters  
Date\_ 20250306  
Time 11.05  
INSTRUM spect  
PROBHD 5 mm PABBO HB/  
PULPROG zgpg30  
TD 32768  
SOLVENT CDCl3  
NS 360  
DS 2  
SWH 24038.461 Hz  
FIDRES 0.733596 Hz  
AQ 0.6815744 sec  
RG 186.42  
DW 20.800 usec  
DE 6.50 usec  
TE 295.9 K  
D1 2.00000000 sec  
D11 0.03000000 sec  
TDO 1

===== CHANNEL f1 =====  
SF01 100.6278588 MHz  
NUC1 13C  
P1 8.90 usec  
PLW1 54.00000000 W

===== CHANNEL f2 =====  
SF02 400.1516006 MHz  
NUC2 1H  
CPDPRG12 waltz16  
PCPD2 90.00 usec  
PLW2 12.00000000 W  
PLW12 0.32231000 W  
PLW13 0.16212000 W

F2 - Processing parameters  
S1 16384  
SF 100.6177859 MHz  
WDW EM  
SSB 0  
LB 1.00 Hz  
GB 0  
PC 1.40

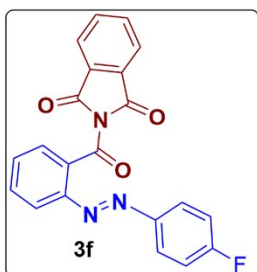

<sup>1</sup>H NMR: 400 MHz  
Solvent: CDCl<sub>3</sub>

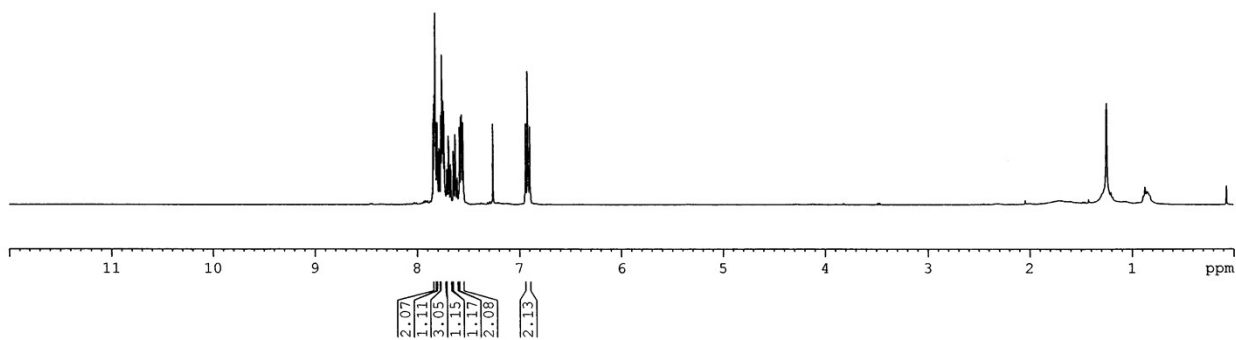

7.851  
7.842  
7.834  
7.828  
7.821  
7.803  
7.786  
7.783  
7.767  
7.765  
7.756  
7.749  
7.742  
7.735  
7.726  
7.712  
7.709  
7.702  
7.693  
7.690  
7.674  
7.670  
7.647  
7.644  
7.628  
7.626  
7.609  
7.607  
7.594  
7.587  
7.582  
7.573  
7.568  
7.564  
7.555  
7.551  
7.543  
7.260  
6.947  
6.939  
6.934  
6.918  
6.896

Current Data Parameters  
NAME Dr. A HAJRA 2025 1H  
EXPNO 663  
PROCNO 1

F2 - Acquisition Parameters  
Date\_ 20251113  
Time 18.11  
INSTRUM spect  
PROBHD 5 mm PABBO BB/  
PULPROG zg30  
TD 32768  
SOLVENT CDCl3  
NS 8  
DS 2  
SWH 8223.685 Hz  
FIDRES 0.250967 Hz  
AQ 1.9922944 sec  
RG 87.66  
DW 60.800 usec  
DE 6.50 usec  
TE 288.9 K  
D1 1.00000000 sec  
TD0 1

----- CHANNEL f1 -----  
SF01 400.1524711 MHz  
NUC1 1H  
P1 14.75 usec  
PLW1 12.00000000 W

F2 - Processing parameters  
SI 16384  
SF 400.1500097 MHz  
WDW EM  
SSB 0  
LB 0.30 Hz  
GB 0  
PC 1.00

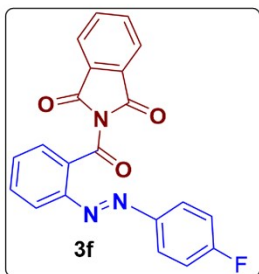

<sup>13</sup>C NMR : 100 MHz  
Solvent: CDCl<sub>3</sub>

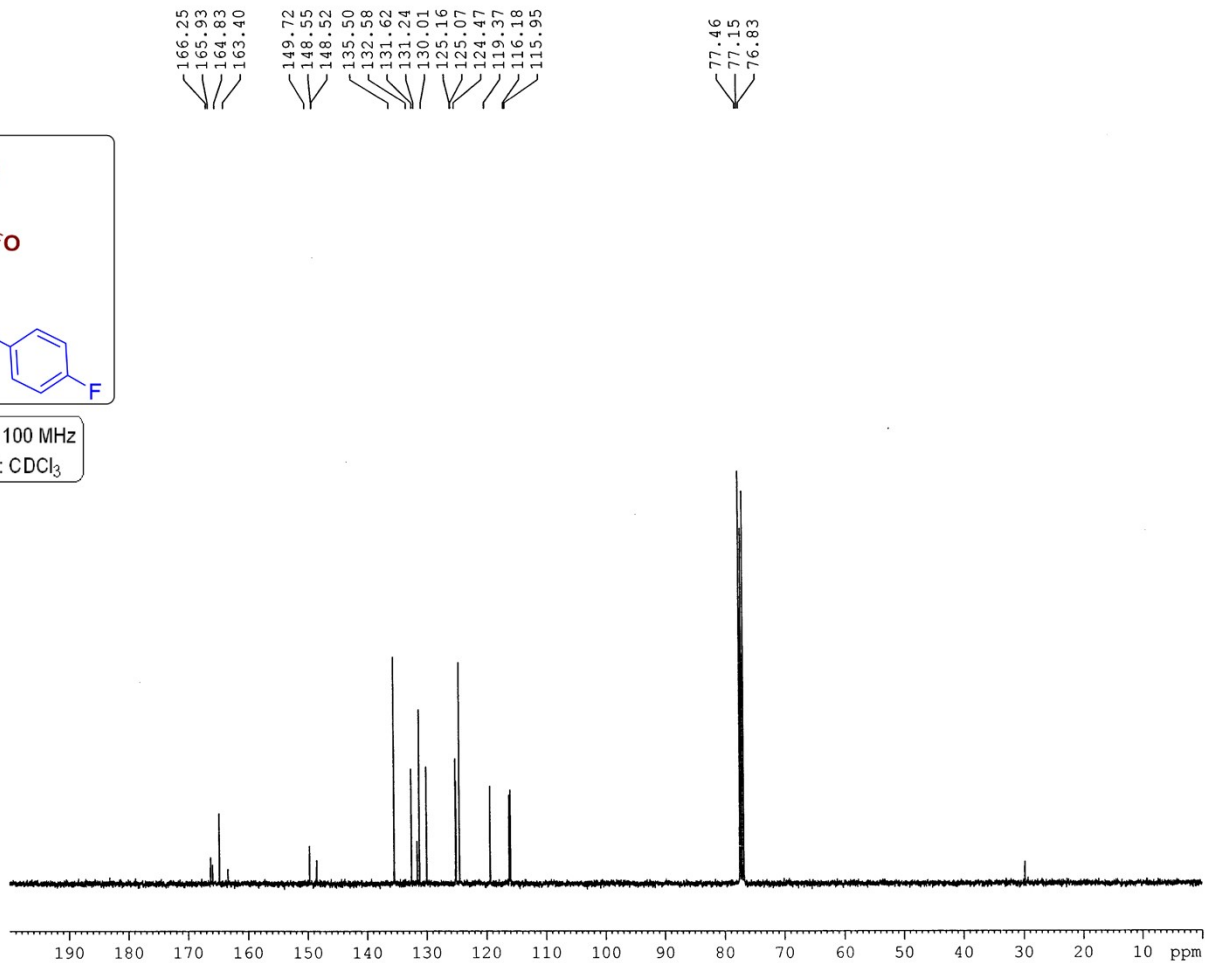

Current Data Parameters  
NAME Dr. A HAJRA-2025-13C  
EXPNO 385  
PROCNO 1

F2 - Acquisition Parameters  
Date\_ 20251113  
Time 19.32  
INSTRUM spect  
PROBHD 5 mm FAPBO BB/  
PULPROG zgpg30  
TD 32768  
SOLVENT CDCl3  
NS 340  
DS 2  
SWH 24038.461 Hz  
FIDRES 0.733596 Hz  
AQ 0.6815744 sec  
RG 186.42  
DW 20.800 usec  
DE 6.50 usec  
TE 290.1 K  
D1 2.00000000 sec  
D11 0.03000000 sec  
TD0 1

===== CHANNEL f1 =====  
SFO1 100.6278588 MHz  
NUC1 13C  
P1 8.90 usec  
PLW1 54.00000000 W

===== CHANNEL f2 =====  
SFO2 400.1516006 MHz  
NUC2 1H  
CPOPRG(2) waltz16  
PCPD2 90.00 usec  
PLW2 12.00000000 W  
PLW12 0.32231000 W  
PLW13 0.16212000 W

F2 - Processing parameters  
SI 16384  
SF 100.6177895 MHz  
WDW EM  
SSB 0  
LB 1.00 Hz  
GB 0  
PC 1.40

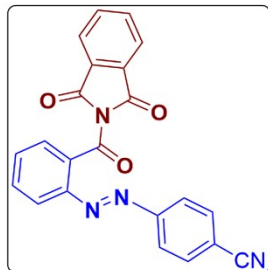

<sup>1</sup>H NMR: 400 MHz  
Solvent: CDCl<sub>3</sub>

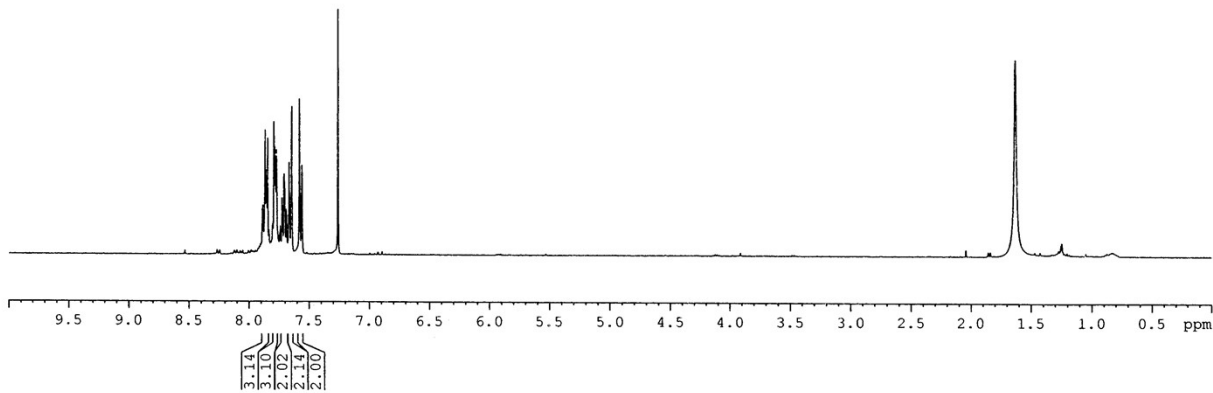

7.889  
7.884  
7.866  
7.859  
7.853  
7.845  
7.835  
7.812  
7.803  
7.793  
7.785  
7.779  
7.771  
7.745  
7.740  
7.726  
7.721  
7.708  
7.705  
7.691  
7.688  
7.666  
7.645  
7.580  
7.559  
7.559

Current Data Parameters  
NAME Dr. A HAJRA 2025 1H  
EXPNO 453  
PROCNO 1

F2 - Acquisition Parameters  
Date\_ 20250729  
Time\_ 10.18  
INSTRUM spect  
PROBHD 5 mm PABBO BB/  
PULPROG zg30  
TD 32768  
SOLVENT CDCl3  
NS 8  
DS 2  
SWH 8223.685 Hz  
FIDRES 0.250967 Hz  
AQ 1.9922944 sec  
RG 135.7  
DW 60.800 usec  
DE 6.50 usec  
TE 293.3 K  
D1 1.00000000 sec  
TD0 1

===== CHANNEL f1 =====  
SFO1 400.1524711 MHz  
NUC1 1H  
P1 14.75 usec  
PLW1 12.00000000 W

F2 - Processing parameters  
SI 16384  
SF 400.1500098 MHz  
WDW EM  
SSB 0  
LB 0.30 Hz  
GB 0  
PC 1.00

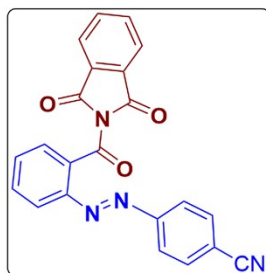

<sup>13</sup>C NMR : 100 MHz  
Solvent: CDCl<sub>3</sub>

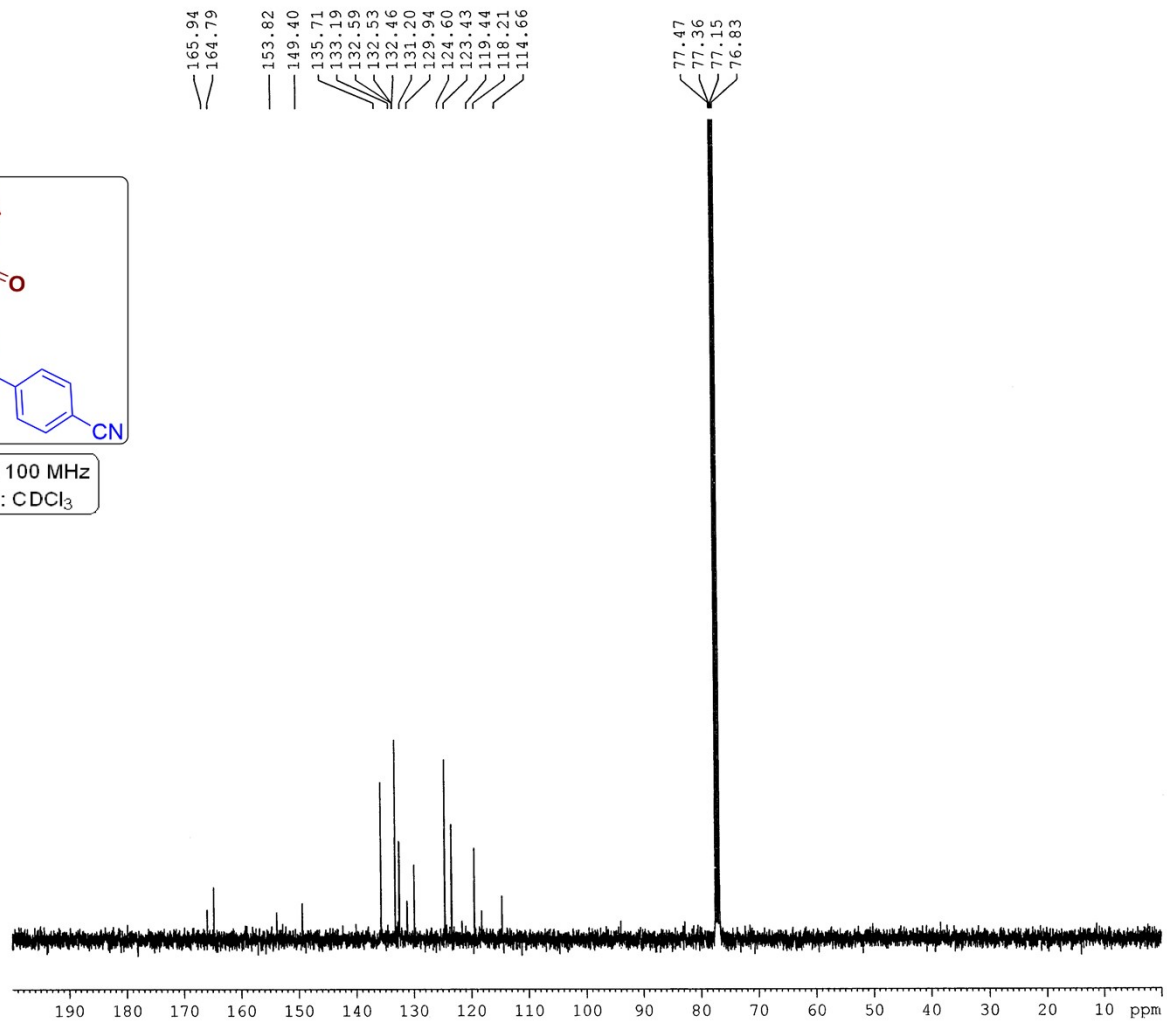

Current Data Parameters  
NAME Dr. A HAJRA-2025-13C  
EXFNO 262  
PROCNO 1

F2 - Acquisition Parameters  
Date\_ 20250729  
Time 10.48  
INSTRUM spect  
PROBHD 5 mm FAPBO BB/  
PULPROG zgpg30  
TD 32768  
SOLVENT CDCl3  
NS 570  
DS 2  
SWH 24038.461 Hz  
FIDRES 0.733596 Hz  
AQ 0.6815744 sec  
RG 186.42  
DW 20.800 usec  
DE 6.50 usec  
TE 294.1 K  
D1 2.00000000 sec  
D11 0.03000000 sec  
TD0 1

===== CHANNEL f1 =====  
SFO1 100.6278588 MHz  
NUC1 13C  
P1 8.90 usec  
PLW1 54.00000000 W

===== CHANNEL f2 =====  
SFO2 400.1516006 MHz  
NUC2 1H  
CPDPRG[2] waltz16  
PCPDZ 90.00 usec  
PLW2 12.00000000 W  
PLW12 0.32231000 W  
PLW13 0.16212000 W

F2 - Processing parameters  
SI 16384  
SF 100.6177858 MHz  
WDW EM  
SSB 0  
LB 1.00 Hz  
GB 0  
PC 1.40

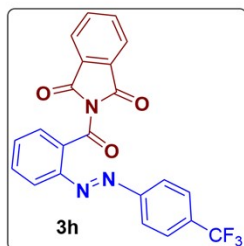

<sup>1</sup>H NMR: 400 MHz  
Solvent: CDCl<sub>3</sub>

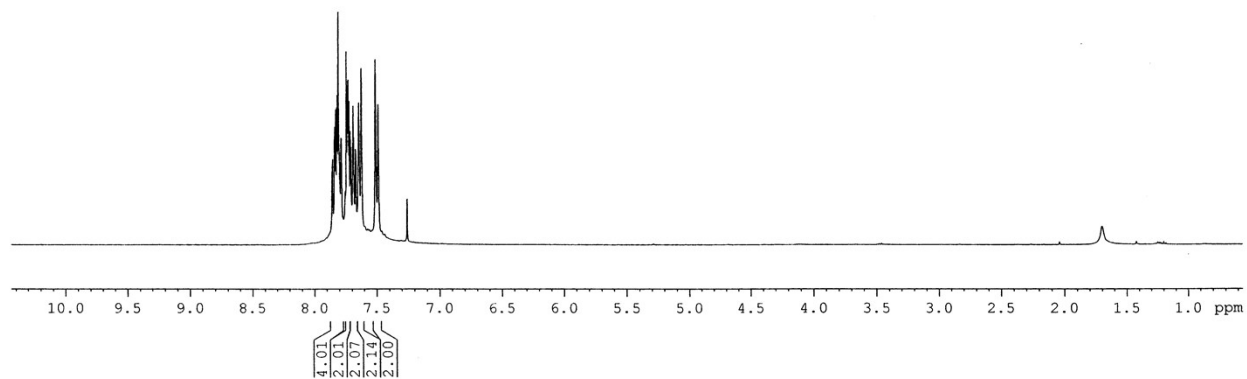

7.857  
7.854  
7.835  
7.828  
7.821  
7.814  
7.806  
7.787  
7.783  
7.752  
7.743  
7.735  
7.729  
7.721  
7.712  
7.707  
7.693  
7.688  
7.685  
7.670  
7.667  
7.643  
7.622  
7.506  
7.488  
7.259

Current Data Parameters  
NAME Dr. A HAJRA 2025 1H  
EXPNO 705  
PROCNO 1

F2 - Acquisition Parameters  
Date\_ 20251204  
Time 11.26  
INSTRUM spect  
PROBHD 5 mm PABBO BB/  
PULPROG zg30  
TD 32768  
SOLVENT CDCl3  
NS 8  
DS 2  
SWH 8223.685 Hz  
FIDRES 0.250967 Hz  
AQ 1.9922944 sec  
RG 77.59  
DW 60.800 usec  
DE 6.50 usec  
TE 290.3 K  
D1 1.00000000 sec  
TDO 1

===== CHANNEL f1 =====  
SFO1 400.1524711 MHz  
NUC1 1H  
P1 14.75 usec  
PLW1 12.00000000 W

F2 - Processing parameters  
SI 16384  
SF 400.1500098 MHz  
WDW EM  
SSB 0  
LB 0.30 Hz  
GB 0  
PC 1.00

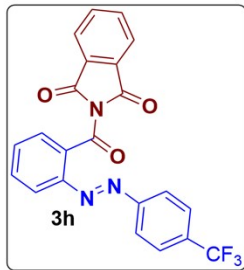

$^{13}\text{C}$  NMR : 100 MHz  
Solvent :  $\text{CDCl}_3$

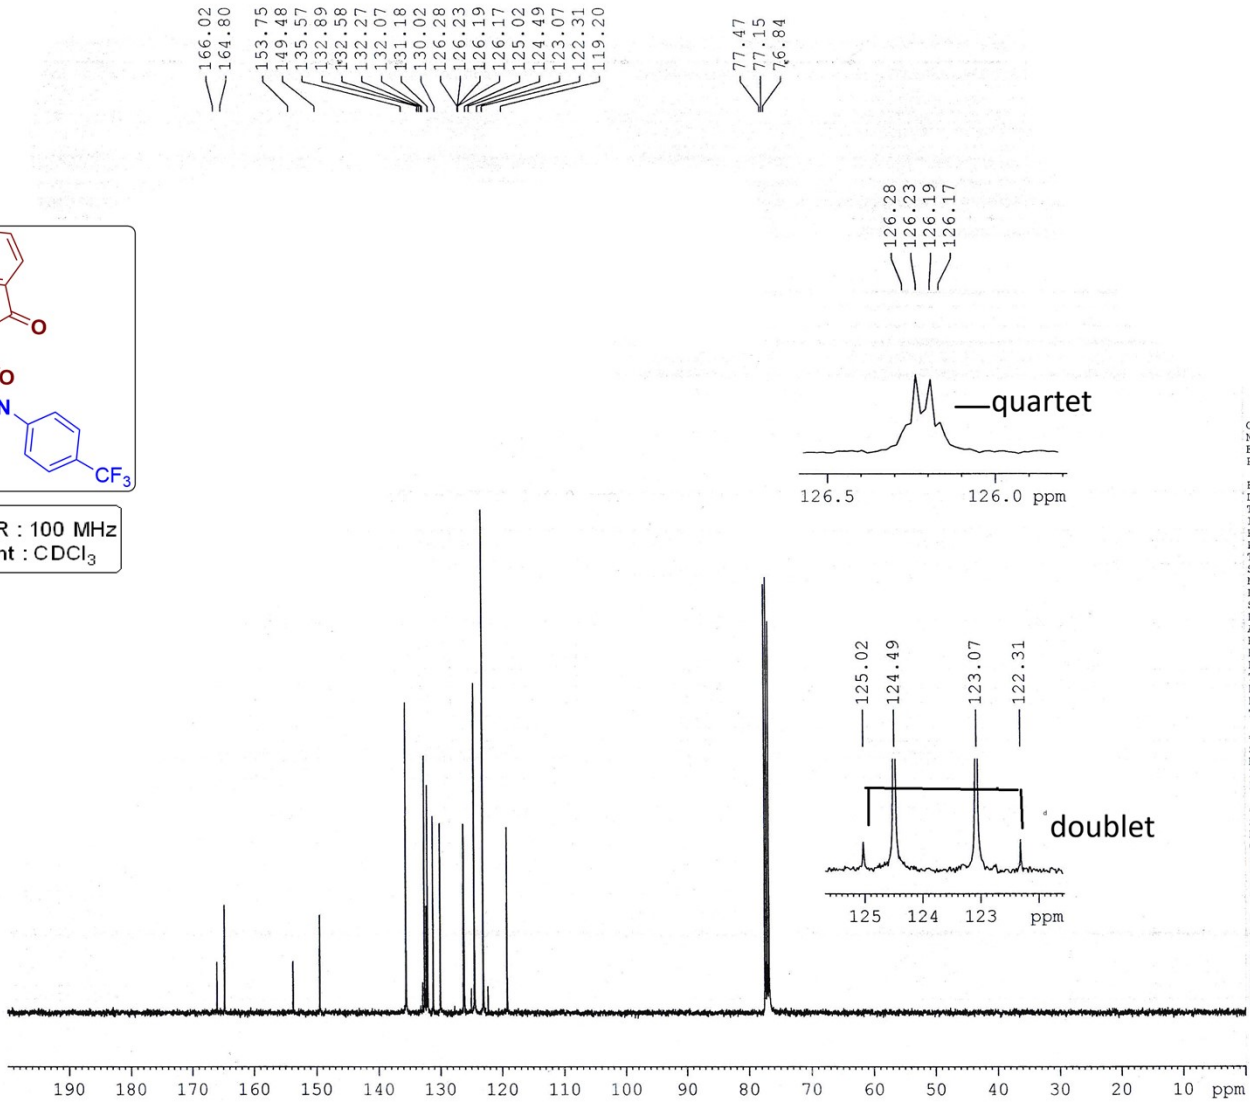

```

Current Data Parameters
NAME      Dr. A HAJRA-2025-13C
EXPNO     411
PROCNO    1

F2 - Acquisition Parameters
Date_     20251204
Time      12.03
INSTRUM   spect
PROBHD    5 mm PABBO BB/
PULPROG   zgpg30
TD         32768
SOLVENT   CDCl3
NS         690
DS         2
SWH       24038.461 Hz
FIDRES    0.733596 Hz
AQ         0.6815744 sec
RG         186.42
DW         20.800 usec
DE         6.50 usec
TE         291.2 K
D1         2.0000000 sec
D11        0.0300000 sec
TDO        1

===== CHANNEL f1 =====
SFO1      100.6278588 MHz
NUC1       13C
P1         8.90 usec
PLW1       54.0000000 W

===== CHANNEL f2 =====
SFO2      400.1516006 MHz
NUC2       1H
CPDPRG2   waltz16
PCPD2     90.00 usec
PLW2      12.0000000 W
PLW12     0.32231000 W
PLW13     0.16212000 W

F2 - Processing parameters
SI         16384
SF         100.6177902 MHz
WDW        EM
SSB        0
LB         1.00 Hz
GB         0
PC         1.40
  
```

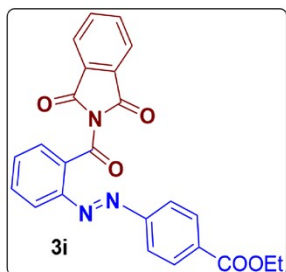

<sup>1</sup>H NMR: 400 MHz  
Solvent: CDCl<sub>3</sub>

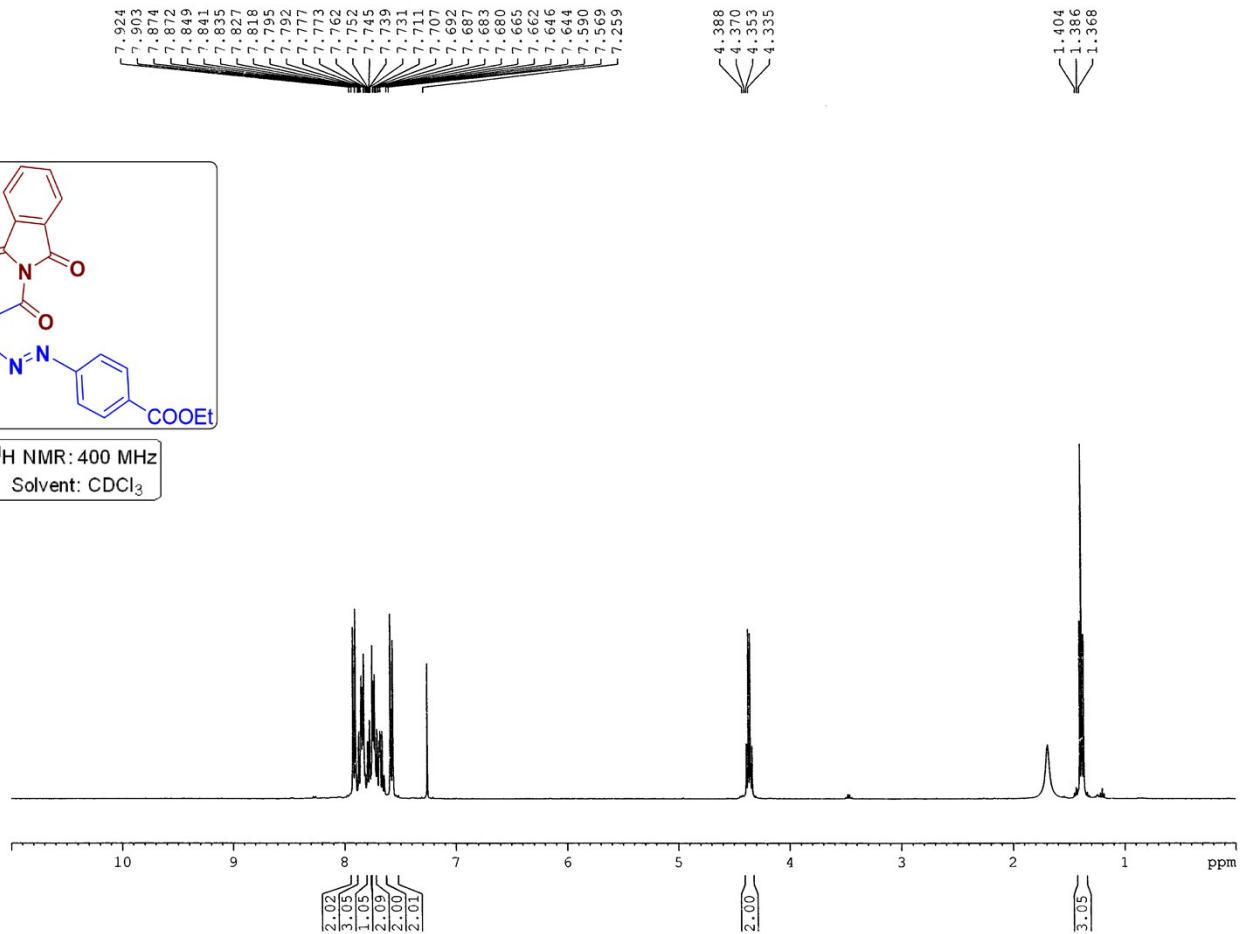

Current Data Parameters  
NAME Dr. A HAJRA 2025 1H  
EXPNO 423  
PROCNO 1

F2 - Acquisition Parameters  
Date\_ 20250721  
Time\_ 19.12  
INSTRUM spect  
PROBHD 5 mm PABBO BB/  
PULPROG zg30  
TD 32768  
SOLVENT CDCl3  
NS 8  
DS 2  
SWH 8223.685 Hz  
FIDRES 0.250967 Hz  
AQ 1.9922944 sec  
RG 148.91  
DW 60.800 usec  
DE 6.50 usec  
TE 291.2 K  
D1 1.00000000 sec  
TD0 1

===== CHANNEL f1 =====  
SFO1 400.1524711 MHz  
NUC1 1H  
P1 14.75 usec  
PLW1 12.00000000 W

F2 - Processing parameters  
SI 16384  
SF 400.1500098 MHz  
WDW EM  
SSB 0  
LB 0.30 Hz  
GB 0  
PC 1.00

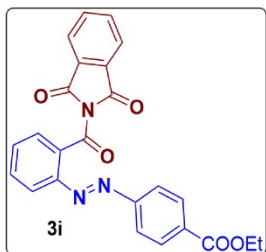

<sup>13</sup>C NMR : 100 MHz  
Solvent: CDCl<sub>3</sub>

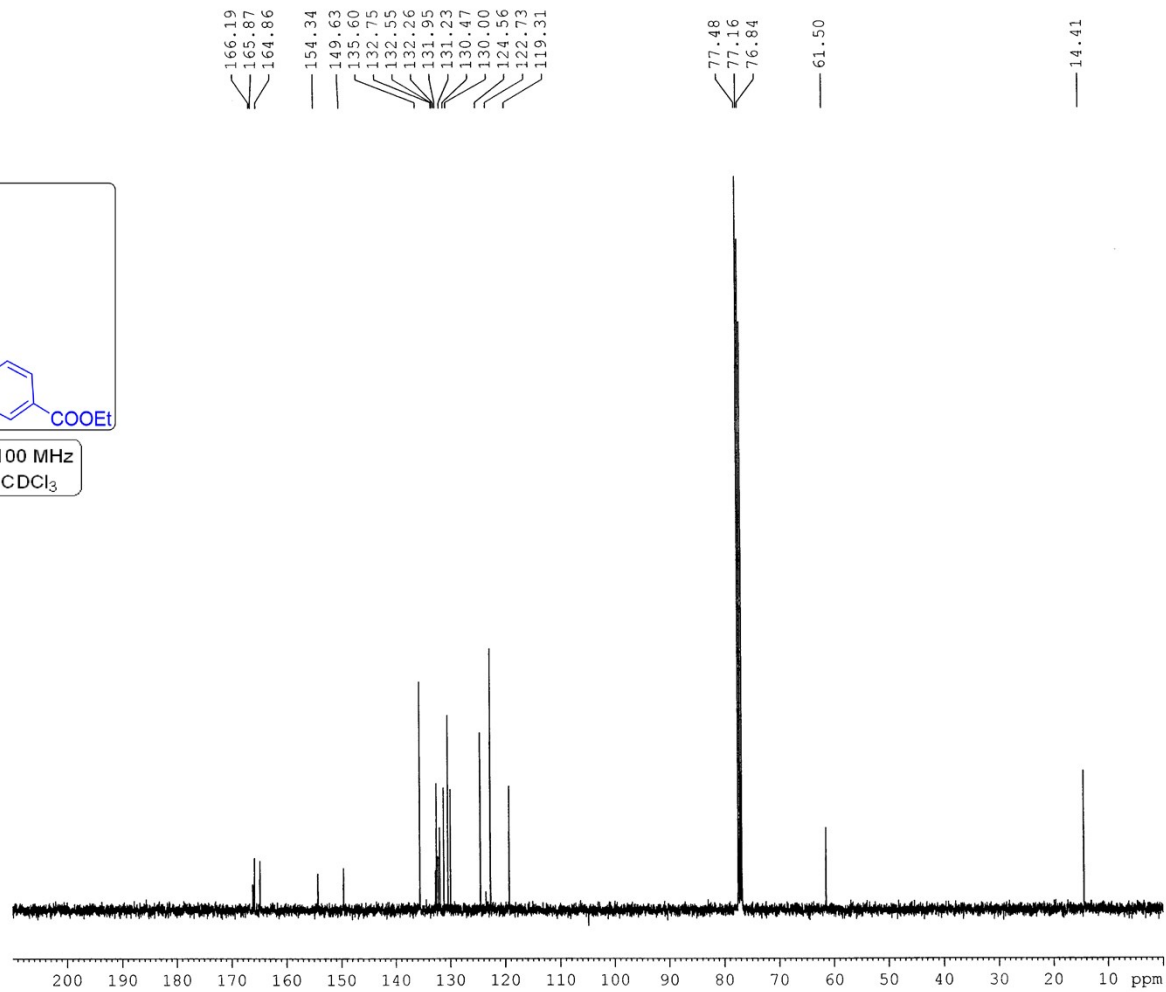

Current Data Parameters  
NAME Dr. A HAJRA-2025-13C  
EXPNO 249  
PROCNO 1

F2 - Acquisition Parameters  
Date\_ 20250721  
Time\_ 19.31  
INSTRUM spect  
PROBHD 5 mm PABBO BB/  
PULPROG zgpg30  
TD 32768  
SOLVENT CDCl3  
NS 310  
DS 2  
SWH 24038.461 Hz  
FIDRES 0.733596 Hz  
AQ 0.6815744 sec  
RG 186.42  
DW 20.800 usec  
DE 6.50 usec  
TE 291.9 K  
D1 2.00000000 sec  
D11 0.03000000 sec  
TDO 1

----- CHANNEL f1 -----  
SF01 100.6278588 MHz  
NUC1 13C  
P1 8.90 usec  
PLW1 54.00000000 W

----- CHANNEL f2 -----  
SF02 400.1516006 MHz  
NUC2 1H  
CPDPRG[2] waltz16  
PCPD2 90.00 usec  
PLW2 12.00000000 W  
PLW12 0.32231000 W  
PLW13 0.16212000 W

F2 - Processing parameters  
SI 16384  
SF 100.6177869 MHz  
WDW EM  
SSB 0  
LB 1.00 Hz  
GB 0  
PC 1.40

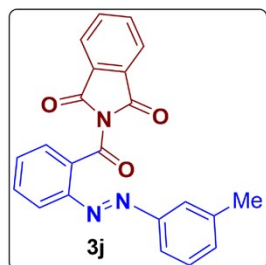

<sup>1</sup>H NMR: 400 MHz  
Solvent: CDCl<sub>3</sub>

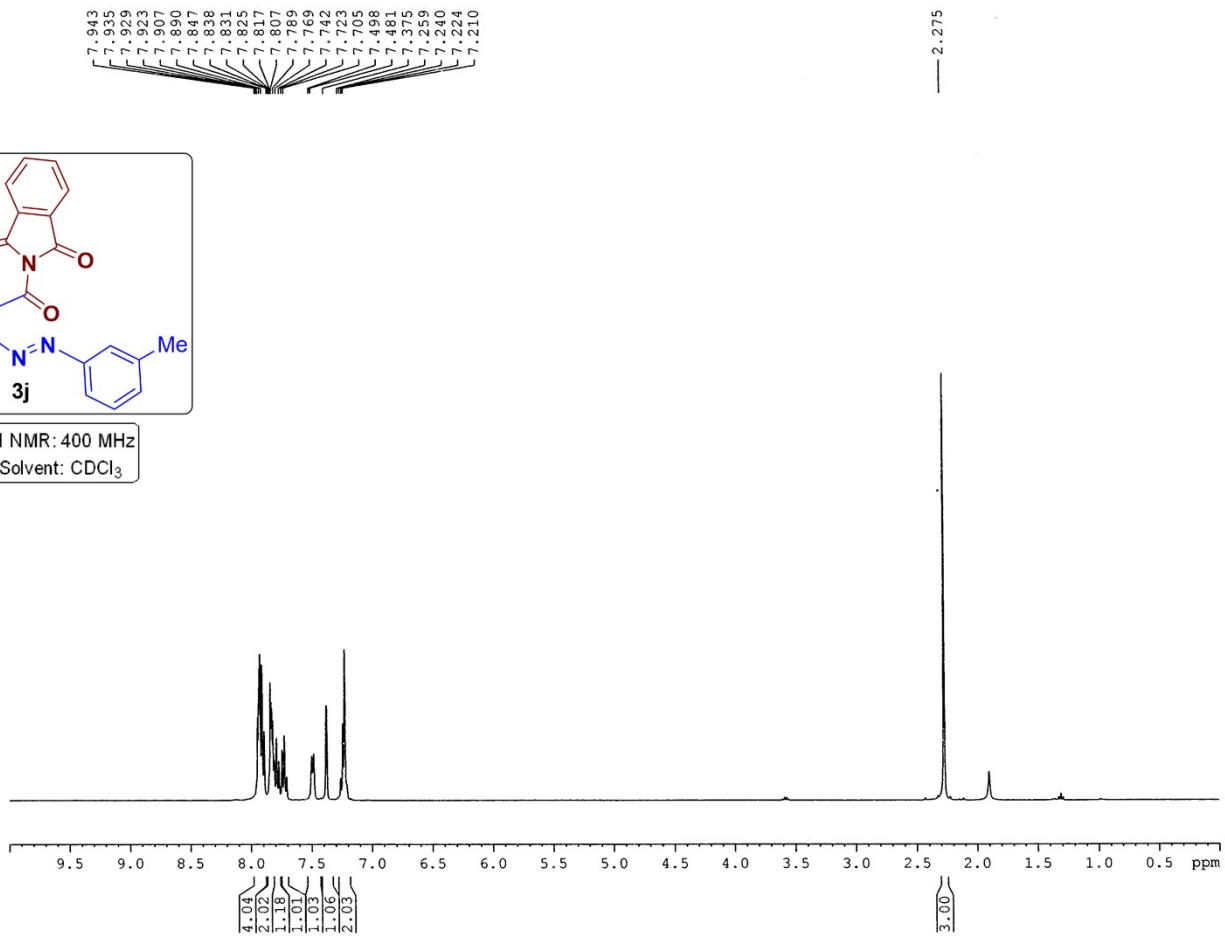

Current Data Parameters  
NAME Dr. A HAJRA 2025 1H  
EXPNO 407  
PROCNO 1

F2 - Acquisition Parameters  
Date\_ 20250718  
Time\_ 12.55  
INSTRUM spect  
PROBHD 5 mm PABBO BB/  
PULPROG zg30  
TD 32768  
SOLVENT CDCl3  
NS 8  
DS 2  
SWH 8223.685 Hz  
FIDRES 0.250967 Hz  
AQ 1.9922944 sec  
RG 57.28  
DW 60.800 usec  
DE 6.50 usec  
TE 292.1 K  
D1 1.0000000 sec  
TD0 1

===== CHANNEL f1 =====  
SFO1 400.1524711 MHz  
NUC1 1H  
P1 14.75 usec  
PLW1 12.0000000 W

F2 - Processing parameters  
SI 16384  
SF 400.1499646 MHz  
WDW EM  
SSB 0  
LB 0.30 Hz  
GB 0  
PC 1.00

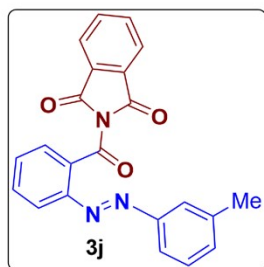

<sup>13</sup>C NMR : 100 MHz  
Solvent: CDCl<sub>3</sub>

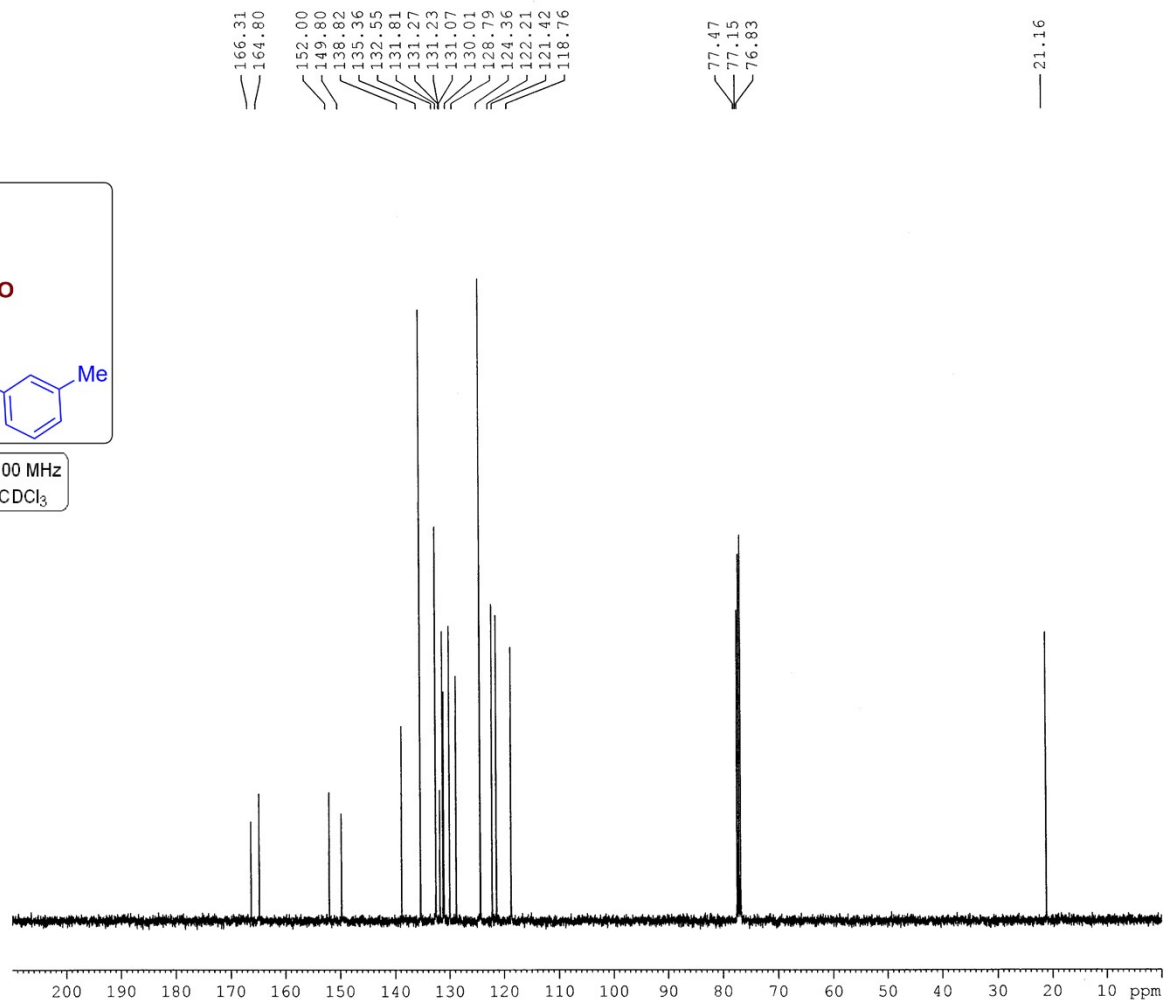

Current Data Parameters  
NAME Dr. A HAJRA-2025-13C  
EXPNO 234  
PROCNO 1

F2 - Acquisition Parameters  
Date\_ 20250718  
Time 12.15  
INSTRUM spect  
PROBHD 5 mm PABBO BB/  
PULPROG zgpg30  
TD 32768  
SOLVENT CDCl3  
NS 120  
DS 2  
SWH 24038.461 Hz  
FIDRES 0.733596 Hz  
AQ 0.6815744 sec  
RG 186.42  
DW 20.800 usec  
DE 6.50 usec  
TE 292.7 K  
D1 2.0000000 sec  
D11 0.03000000 sec  
TDO 1

===== CHANNEL f1 =====  
SFO1 100.6278588 MHz  
NUC1 13C  
P1 8.90 usec  
PLW1 54.00000000 W

===== CHANNEL f2 =====  
SFO2 400.1516006 MHz  
NUC2 1H  
CPDPRG[2] waltz16  
PCPD2 90.00 usec  
PLW2 12.00000000 W  
PLW12 0.32231000 W  
PLW13 0.16212000 W

F2 - Processing parameters  
SI 16384  
SF 100.6177960 MHz  
WDW EM  
SSB 0  
LB 1.00 Hz  
GB 0  
PC 1.40

7.825  
7.828  
7.822  
7.815  
7.792  
7.777  
7.774  
7.766  
7.731  
7.723  
7.718  
7.710  
7.687  
7.670  
7.649  
7.644  
7.623  
7.606  
7.518  
7.500  
7.359  
7.360  
7.358  
7.353  
7.240  
7.237  
7.220  
7.201  
7.181

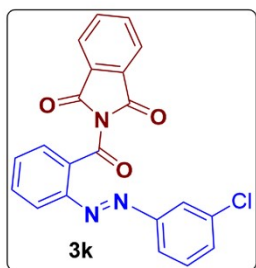

<sup>1</sup>H NMR: 400 MHz  
Solvent: CDCl<sub>3</sub>

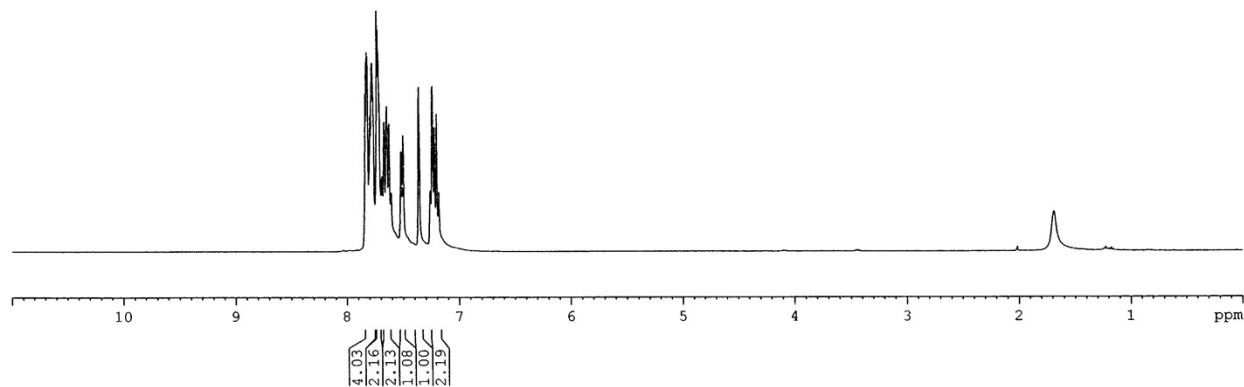

Current Data Parameters  
NAME Dr. A HAJRA 2025 1H  
EXPNO 383  
PROCNO 1

F2 - Acquisition Parameters  
Date\_ 20250709  
Time 10.32  
INSTRUM spect  
PROBHD 5 mm PABBO BB/  
PULPROG zg30  
TD 32768  
SOLVENT CDCl3  
NS 8  
DS 2  
SWH 8223.685 Hz  
FIDRES 0.250967 Hz  
AQ 1.9922944 sec  
RG 93.46  
DW 60.800 usec  
DE 6.50 usec  
TE 295.3 K  
D1 1.00000000 sec  
TD0 1

===== CHANNEL f1 =====  
SFO1 400.1524711 MHz  
NUC1 1H  
P1 14.75 usec  
PLW1 12.00000000 W

F2 - Processing parameters  
SI 16384  
SF 400.1500189 MHz  
WDW EM  
SSB 0  
LB 0.30 Hz  
GB 0  
PC 1.00

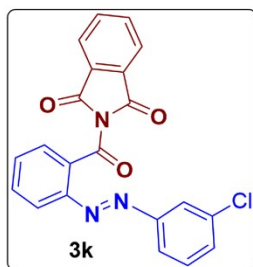

<sup>13</sup>C NMR : 100 MHz  
Solvent: CDCl<sub>3</sub>

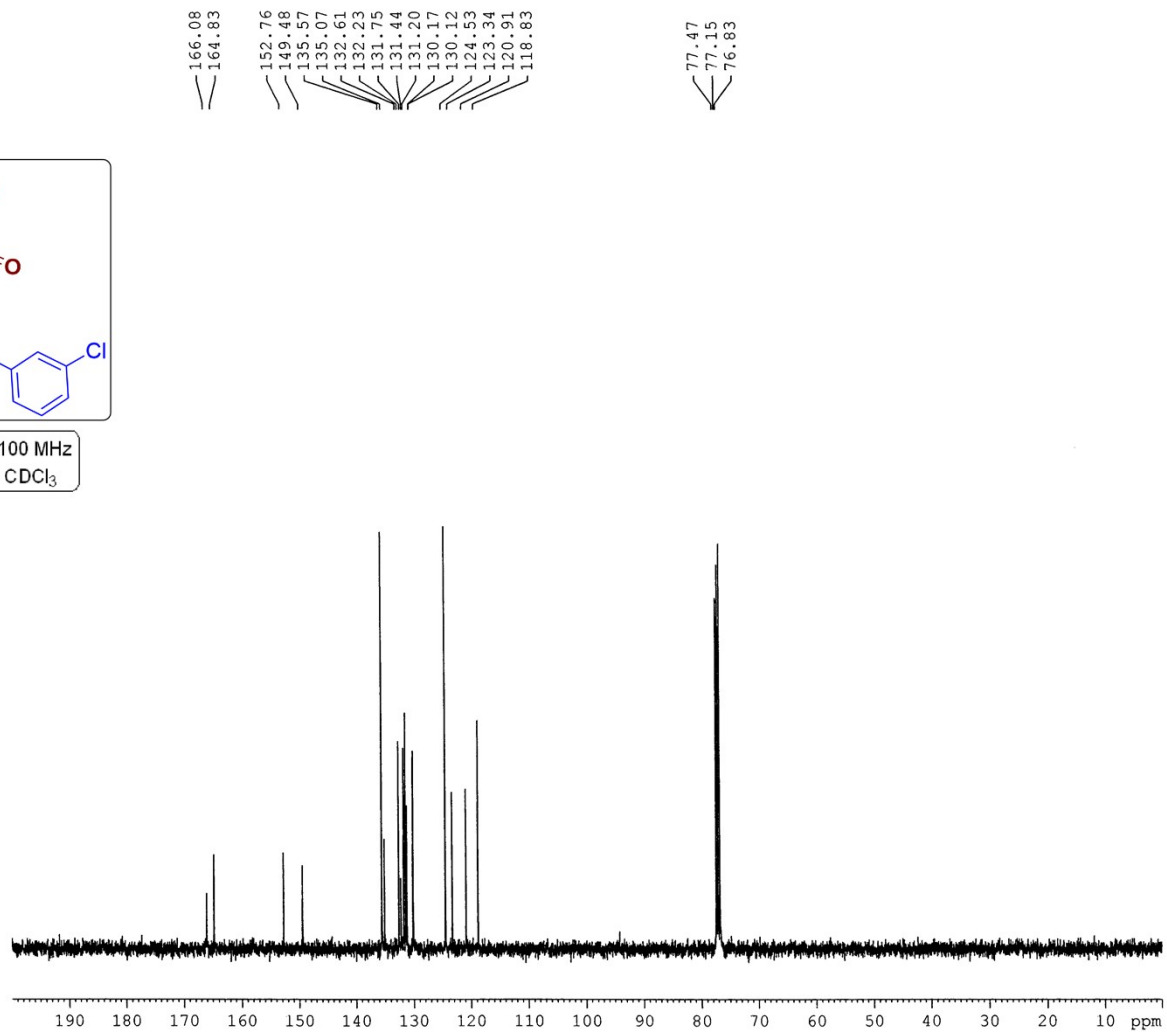

Current Data Parameters  
NAME Dr. A HAJRA-2025-13C  
EXPNO 220  
PROCNO 1

F2 - Acquisition Parameters  
Date\_ 20250709  
Time 10.43  
INSTRUM spect  
PROBHD 5 mm PABBO BB/  
PULPROG zgpg30  
TD 32768  
SOLVENT CDCl3  
NS 134  
DS 2  
SWH 24038.461 Hz  
FIDRES 0.733596 Hz  
AQ 0.6815744 sec  
RG 186.42  
DW 20.800 usec  
DE 6.50 usec  
TE 295.4 K  
D1 2.00000000 sec  
D11 0.03000000 sec  
TD0 1

===== CHANNEL f1 =====  
SFO1 100.6278568 MHz  
NUC1 13C  
P1 8.90 usec  
PLW1 54.00000000 W

===== CHANNEL f2 =====  
SFO2 400.1516006 MHz  
NUC2 1H  
CPDPRG[2] waltz16  
PCPD2 90.00 usec  
PLW2 12.00000000 W  
PLW12 0.32231000 W  
PLW13 0.16212000 W

F2 - Processing parameters  
SI 16384  
SF 100.6177901 MHz  
WDW EM  
SSB 0  
LB 1.00 Hz  
GB 0  
PC 1.40

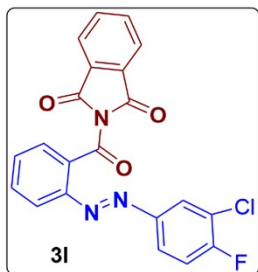

<sup>1</sup>H NMR: 400 MHz  
Solvent: CDCl<sub>3</sub>

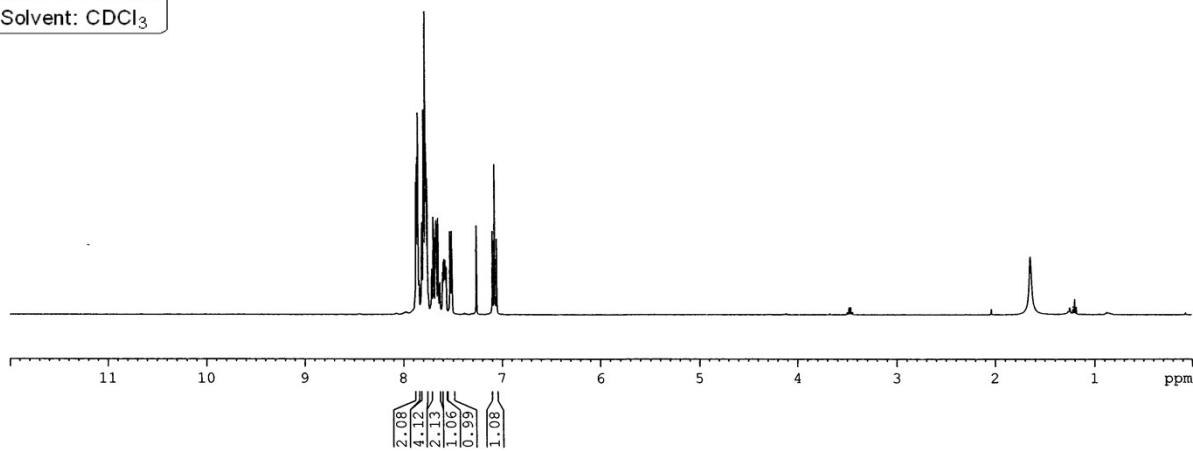

7.873  
7.865  
7.859  
7.851  
7.842  
7.814  
7.812  
7.795  
7.779  
7.771  
7.765  
7.757  
7.749  
7.715  
7.712  
7.697  
7.693  
7.678  
7.673  
7.669  
7.666  
7.650  
7.648  
7.631  
7.630  
7.604  
7.598  
7.593  
7.586  
7.582  
7.576  
7.571  
7.565  
7.565  
7.523  
7.511  
7.505  
7.260  
7.096  
7.075  
7.053

Current Data Parameters  
NAME Dr. A HAJRA 2025 1H  
EXPNO 391  
PROCNO 1

F2 - Acquisition Parameters  
Date\_ 20250712  
Time\_ 19.50  
INSTRUM spect  
PROBHD 5 mm PABBO BB/  
PULPROG zg30  
TD 32768  
SOLVENT CDCl3  
NS 8  
DS 2  
SWH 8223.685 Hz  
FIDRES 0.250967 Hz  
AQ 1.9922944 sec  
RG 135.7  
DW 60.800 usec  
DE 6.50 usec  
TE 295.8 K  
D1 1.00000000 sec  
TD0 1

===== CHANNEL f1 =====  
SFO1 400.1524711 MHz  
NUC1 1H  
P1 14.75 usec  
PLW1 12.00000000 W

F2 - Processing parameters  
SI 16384  
SF 400.1500098 MHz  
WDW EM  
SSB 0  
LB 0.30 Hz  
GB 0  
PC 1.00

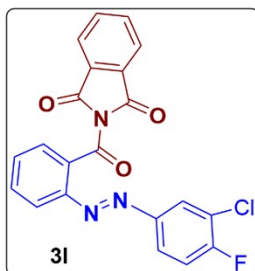

<sup>13</sup>C NMR : 100 MHz  
Solvent: CDCl<sub>3</sub>

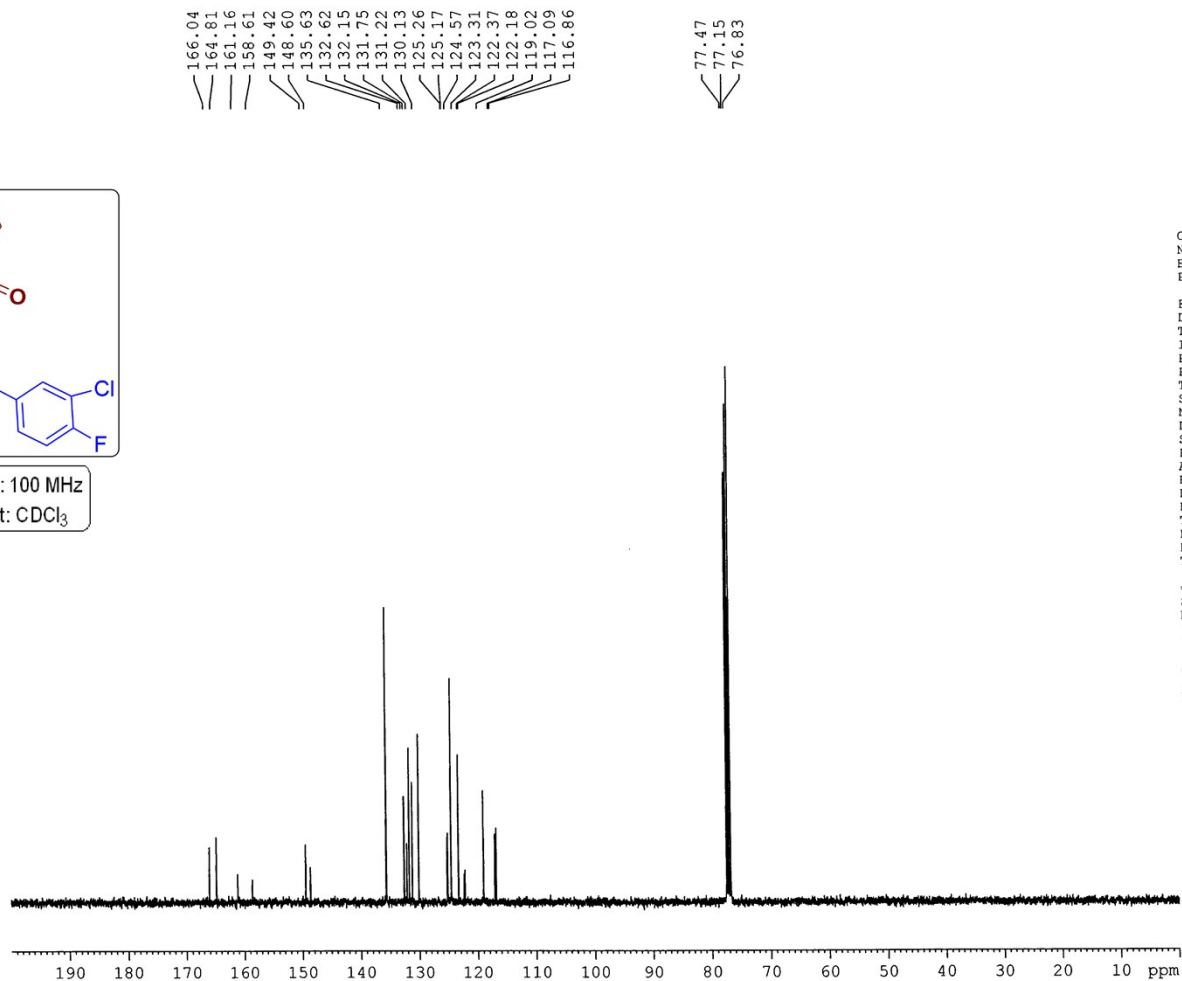

Current Data Parameters  
NAME Dr. A HAJRA-2025-13C  
EXPNO 226  
PROCNO 1

F2 - Acquisition Parameters  
Date\_ 20250712  
Time 20.16  
INSTRUM spect  
PROBHD 5 mm PABBO BB/  
PULPROG zgpg30  
TD 32768  
SOLVENT CDC13  
NS 440  
DS 2  
SWH 24038.461 Hz  
FIDRES 0.733596 Hz  
AQ 0.6815744 sec  
RG 186.42  
DW 20.800 usec  
DE 6.50 usec  
TE 296.9 K  
D1 2.00000000 sec  
D11 0.03000000 sec  
TDO 1

===== CHANNEL f1 =====  
SFO1 100.6278588 MHz  
NUC1 13C  
P1 8.90 usec  
PLW1 54.00000000 W

===== CHANNEL f2 =====  
SFO2 400.1516006 MHz  
NUC2 1H  
CPDPRG[2] waltz16  
PCPD2 90.00 usec  
PLW2 12.00000000 W  
PLW12 0.32231000 W  
PLW13 0.16212000 W

F2 - Processing parameters  
SI 16384  
SF 100.6177873 MHz  
WDW EM  
SSB 0  
LB 1.00 Hz  
GB 0  
PC 1.40

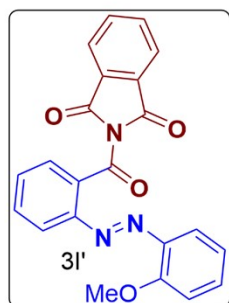

<sup>1</sup>H NMR : 400 MHz  
Solvent : CDCl<sub>3</sub>

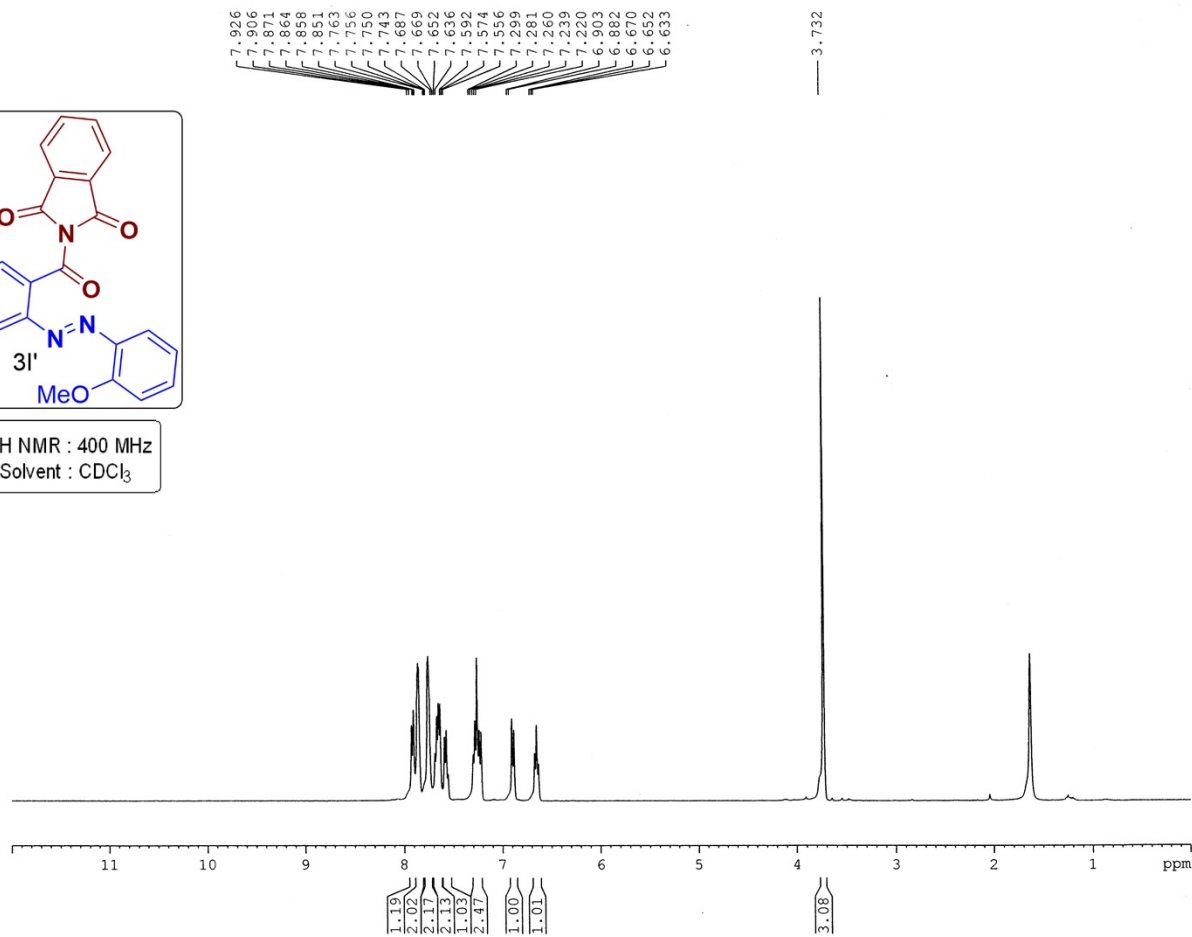

Current Data Parameters  
NAME Dr. A HAJRA 2026 1H  
EXPNO 245  
PROCNO 1

F2 - Acquisition Parameters  
Date\_ 20260409  
Time 20.38  
INSTRUM spect  
PROBHD 5 mm PABBO BB/  
PULPROG zg30  
TD 32768  
SOLVENT CDCl3  
NS 8  
DS 2  
SWH 8223.685 Hz  
FIDRES 0.250967 Hz  
AQ 1.9922944 sec  
RG 168.31  
DW 60.800 usec  
DE 6.50 usec  
TE 293.8 K  
D1 1.00000000 sec  
TDO 1

===== CHANNEL f1 =====  
SFO1 400.1524711 MHz  
NUC1 1H  
P1 14.75 usec  
PLW1 12.00000000 W

F2 - Processing parameters  
SI 16384  
SF 400.1500102 MHz  
WDW EM  
SSB 0  
LB 0.30 Hz  
GB 0  
PC 1.00

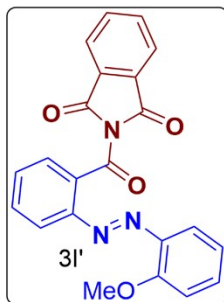

<sup>13</sup>C NMR : 100 MHz  
Solvent : CDCl<sub>3</sub>

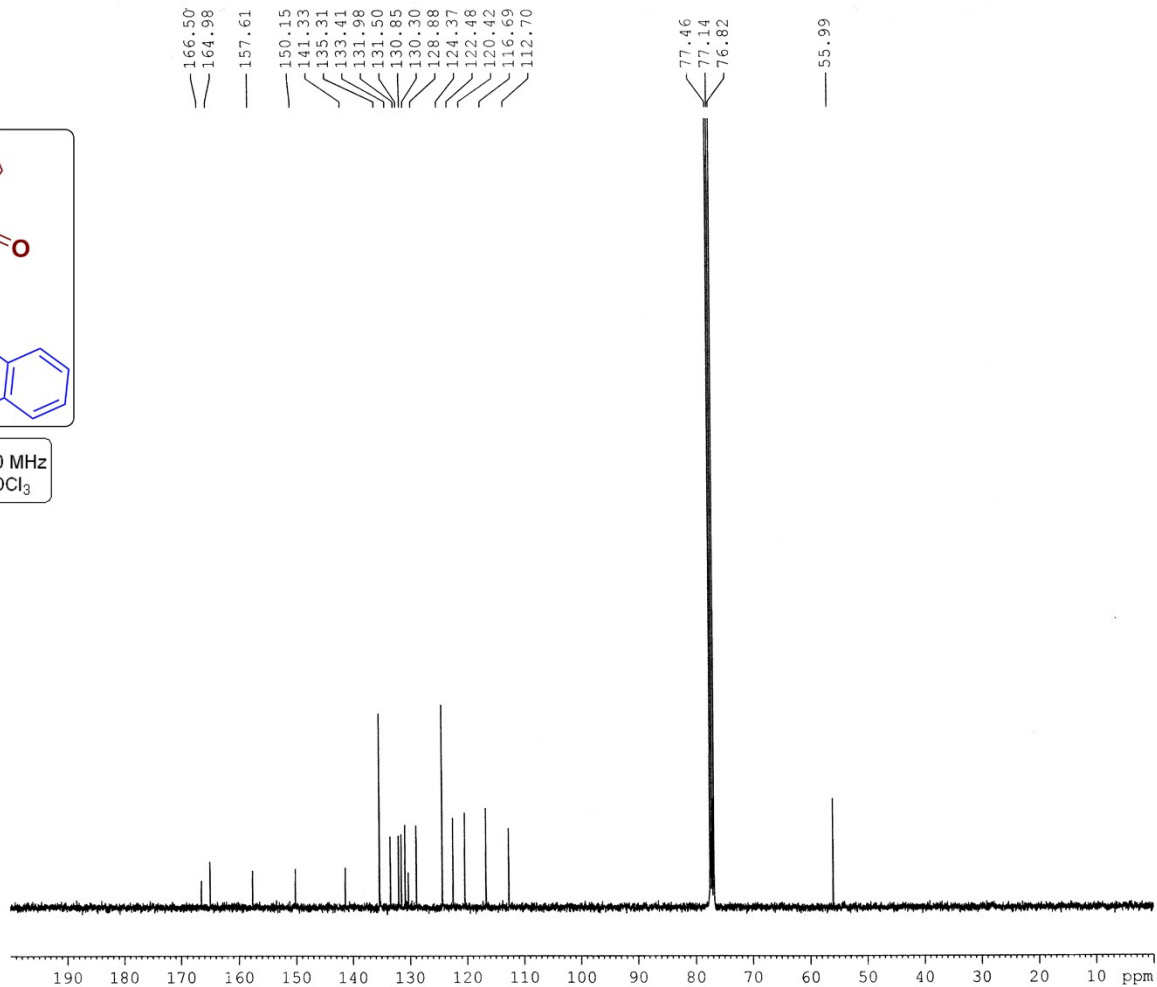

Current Data Parameters  
 NAME Dr. A HAJRA-2026-13C  
 EXPNO 137  
 PROCNO 1

F2 - Acquisition Parameters  
 Date\_ 20260409  
 Time 21:27  
 INSTRUM spect  
 PROBHD 5 mm PABBO BB/  
 PULPROG zgpg30  
 TD 32768  
 SOLVENT CDCl3  
 NS 1000  
 DS 2  
 SWH 24038.461 Hz  
 FIDRES 0.733596 Hz  
 AQ 0.6815744 sec  
 RG 186.42  
 DW 20.800 usec  
 DE 6.50 usec  
 TE 293.4 K  
 D1 2.00000000 sec  
 D11 0.03000000 sec  
 TDO 1

===== CHANNEL f1 =====  
 SFO1 100.6278588 MHz  
 NUC1 13C  
 P1 8.90 usec  
 PLW1 54.00000000 W

===== CHANNEL f2 =====  
 SFO2 400.1516006 MHz  
 NUC2 1H  
 CPDPRG[2] waltz16  
 PCPD2 90.00 usec  
 PLW2 12.00000000 W  
 PLW12 0.32231000 W  
 PLW13 0.16212000 W

F2 - Processing parameters  
 SI 16384  
 SF 100.6177883 MHz  
 WDW EM  
 SSB 0  
 LB 1.00 Hz  
 GB 0  
 PC 1.40

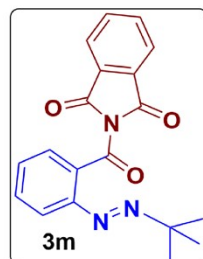

<sup>1</sup>H NMR: 400 MHz  
Solvent: CDCl<sub>3</sub>

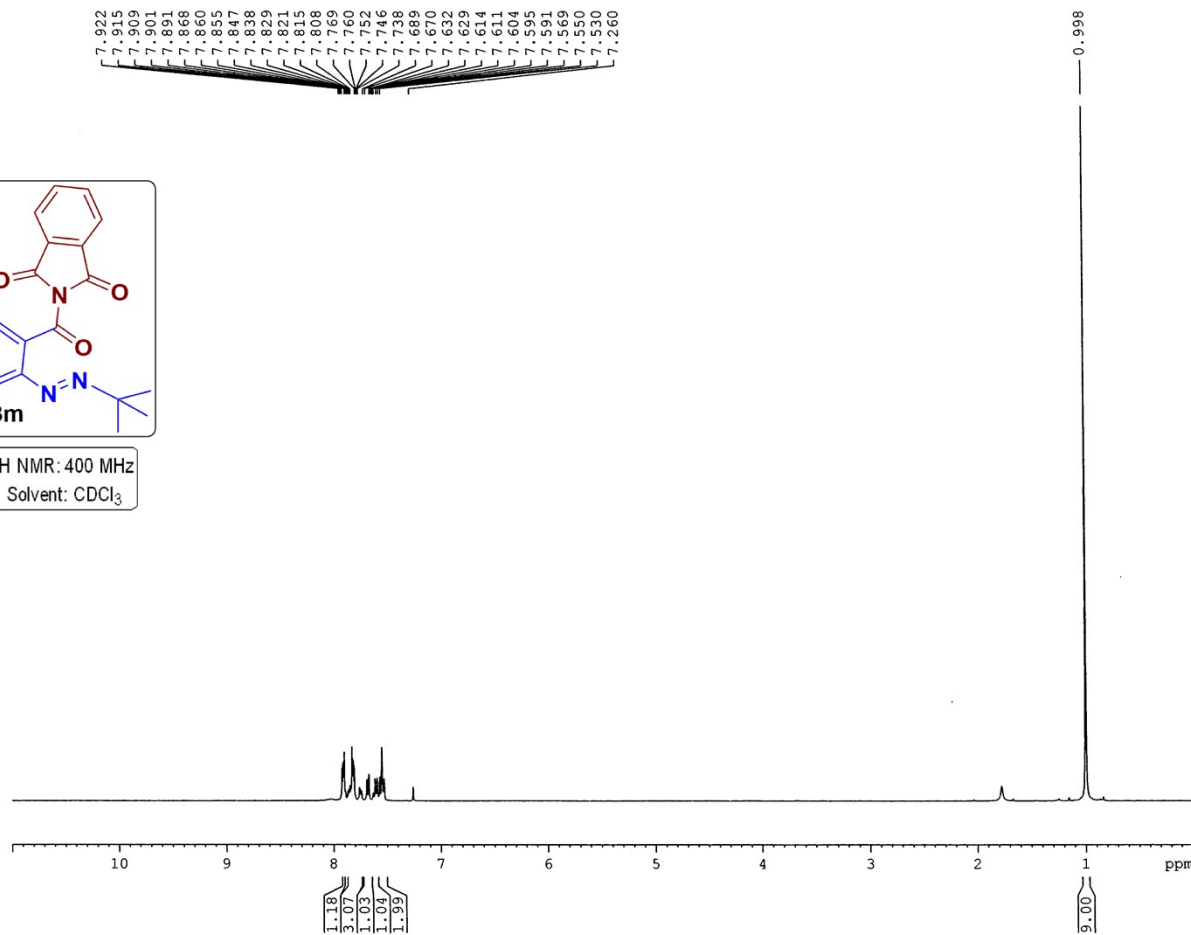

Current Data Parameters  
NAME Dr. A HAJRA 2025 1H  
EXPNO 565  
PROCNO 1

F2 - Acquisition Parameters  
Date\_ 20250920  
Time\_ 9.26  
INSTRUM spect  
PROBHD 5 mm PABBO BB/  
PULPROG zg30  
TD 32768  
SOLVENT CDCl3  
NS 8  
DS 2  
SWH 8223.685 Hz  
FIDRES 0.250967 Hz  
AQ 1.9922944 sec  
RG 93.46  
DW 60.800 usec  
DE 6.50 usec  
TE 291.7 K  
D1 1.00000000 sec  
TD0 1

==== CHANNEL f1 =====  
SFO1 400.1524711 MHz  
NUC1 1H  
P1 14.75 usec  
PLW1 12.00000000 W

F2 - Processing parameters  
SI 16384  
SF 400.1500097 MHz  
WDW EM  
SSB 0  
LB 0.30 Hz  
GB 0  
PC 1.00

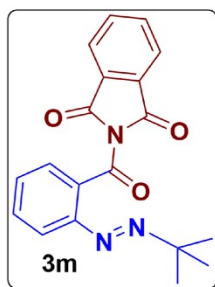

<sup>13</sup>C NMR : 100 MHz  
Solvent: CDCl<sub>3</sub>

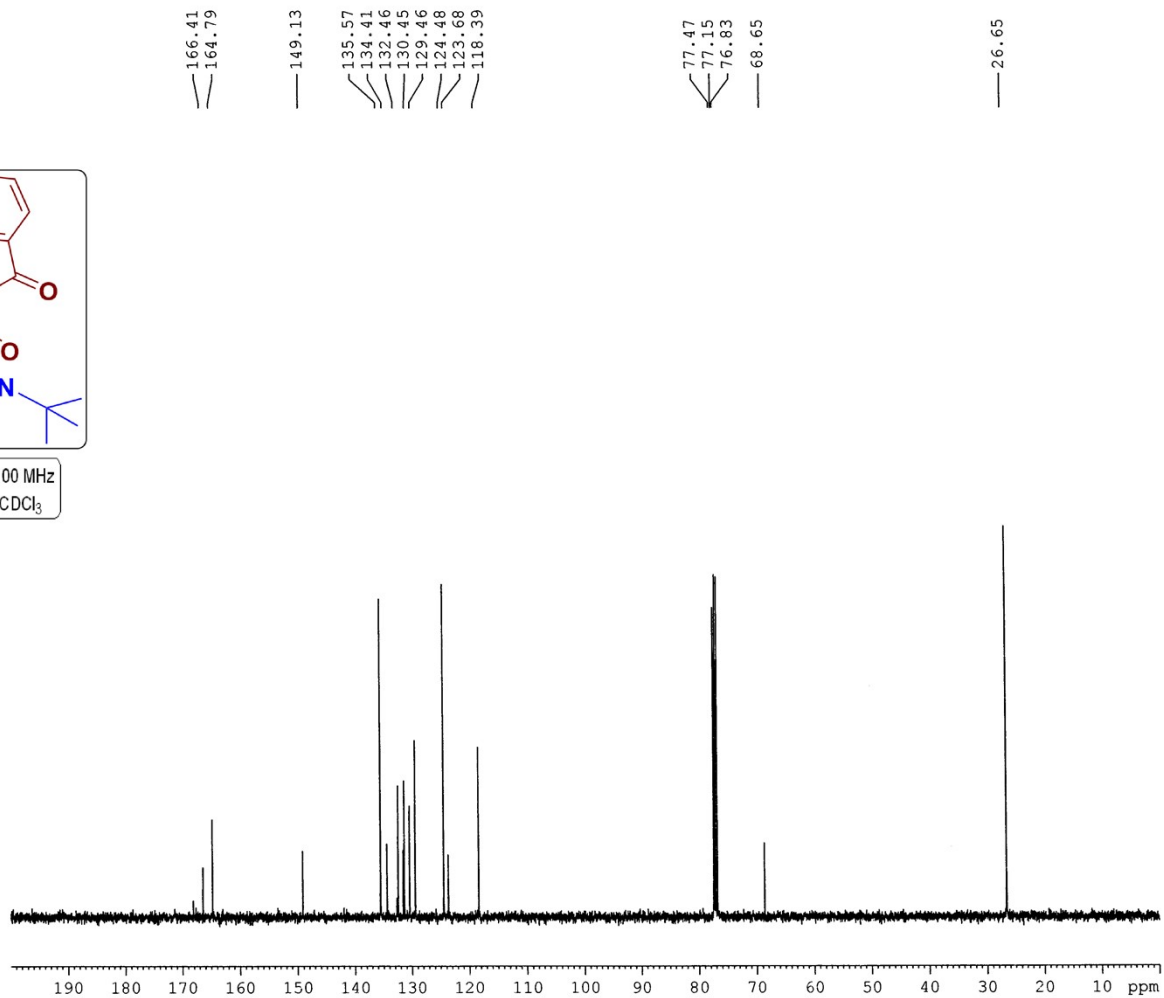

Current Data Parameters  
NAME Dr. A HAJRA-2025-13C  
EXPNO 324  
PROCNO 1

F2 - Acquisition Parameters  
Date\_ 20250920  
Time\_ 9.34  
INSTRUM spect  
PROBHD 5 mm PABBO BB/  
PULPROG zpgg30  
TD 32768  
SOLVENT CDCl3  
NS 130  
DS 2  
SWH 24038.461 Hz  
FIDRES 0.733596 Hz  
AQ 0.6815744 sec  
RG 186.42  
DW 20.800 usec  
DE 6.50 usec  
TE 292.3 K  
D1 2.0000000 sec  
D11 0.0300000 sec  
TD0 1

===== CHANNEL f1 =====  
SFO1 100.6278588 MHz  
NUC1 13C  
P1 8.90 usec  
PLW1 54.00000000 W

===== CHANNEL f2 =====  
SFO2 400.1516006 MHz  
NUC2 1H  
CPDPRG12 waltz16  
PCPD2 90.00 usec  
PLW2 12.00000000 W  
PLW12 0.32231000 W  
PLW13 0.16212000 W

F2 - Processing parameters  
SI 16384  
SF 100.6177905 MHz  
WDSW EM  
SSB 0  
LB 1.00 Hz  
GB 0  
FC 1.40

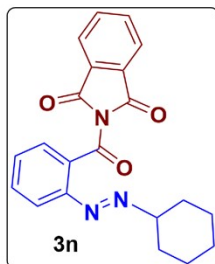

<sup>1</sup>H NMR: 400 MHz  
Solvent: CDCl<sub>3</sub>

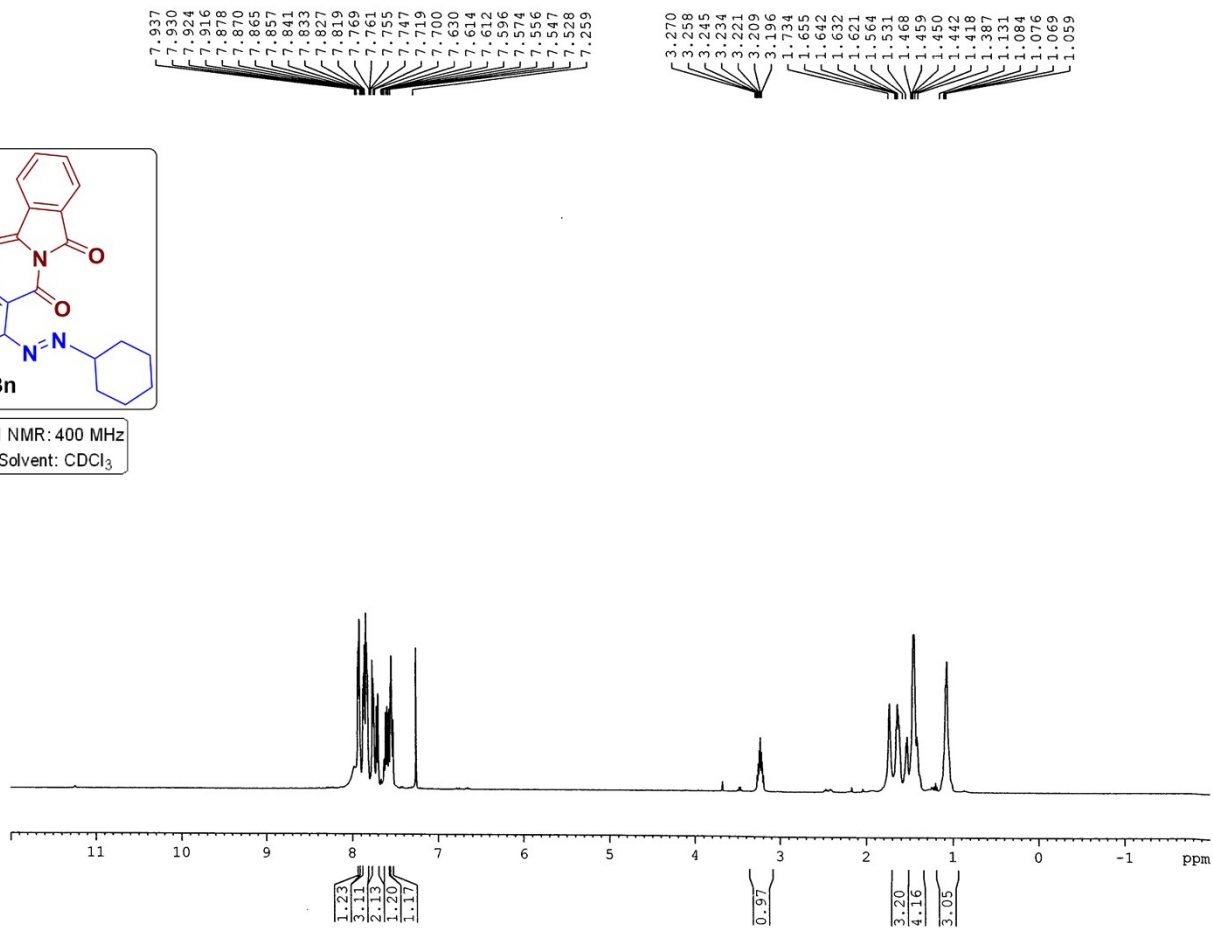

Current Data Parameters  
NAME Dr. A HAJRA 2025 1H  
EXPNO 612  
PROCNO 1

F2 - Acquisition Parameters  
Date\_ 20251017  
Time 21.17  
INSTRUM spect  
PROBHD 5 mm PABBO BB/  
PULPROG zg30  
TD 32768  
SOLVENT CDCl3  
NS 8  
DS 2  
SWH 8223.685 Hz  
FIDRES 0.250967 Hz  
AQ 1.9922944 sec  
RG 106.66  
DW 60.800 usec  
DE 6.50 usec  
TE 289.7 K  
D1 1.00000000 sec  
TD0 1

===== CHANNEL f1 =====  
SF01 400.1524711 MHz  
NUC1 1H  
P1 14.75 usec  
PLW1 12.00000000 W

F2 - Processing parameters  
SI 16384  
SF 400.1500097 MHz  
WDW EM  
SSB 0  
LB 0.30 Hz  
CB 0  
PC 1.00

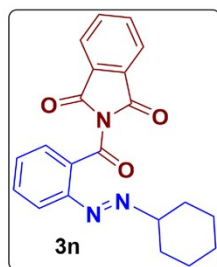

<sup>13</sup>C NMR : 100 MHz  
Solvent: CDCl<sub>3</sub>

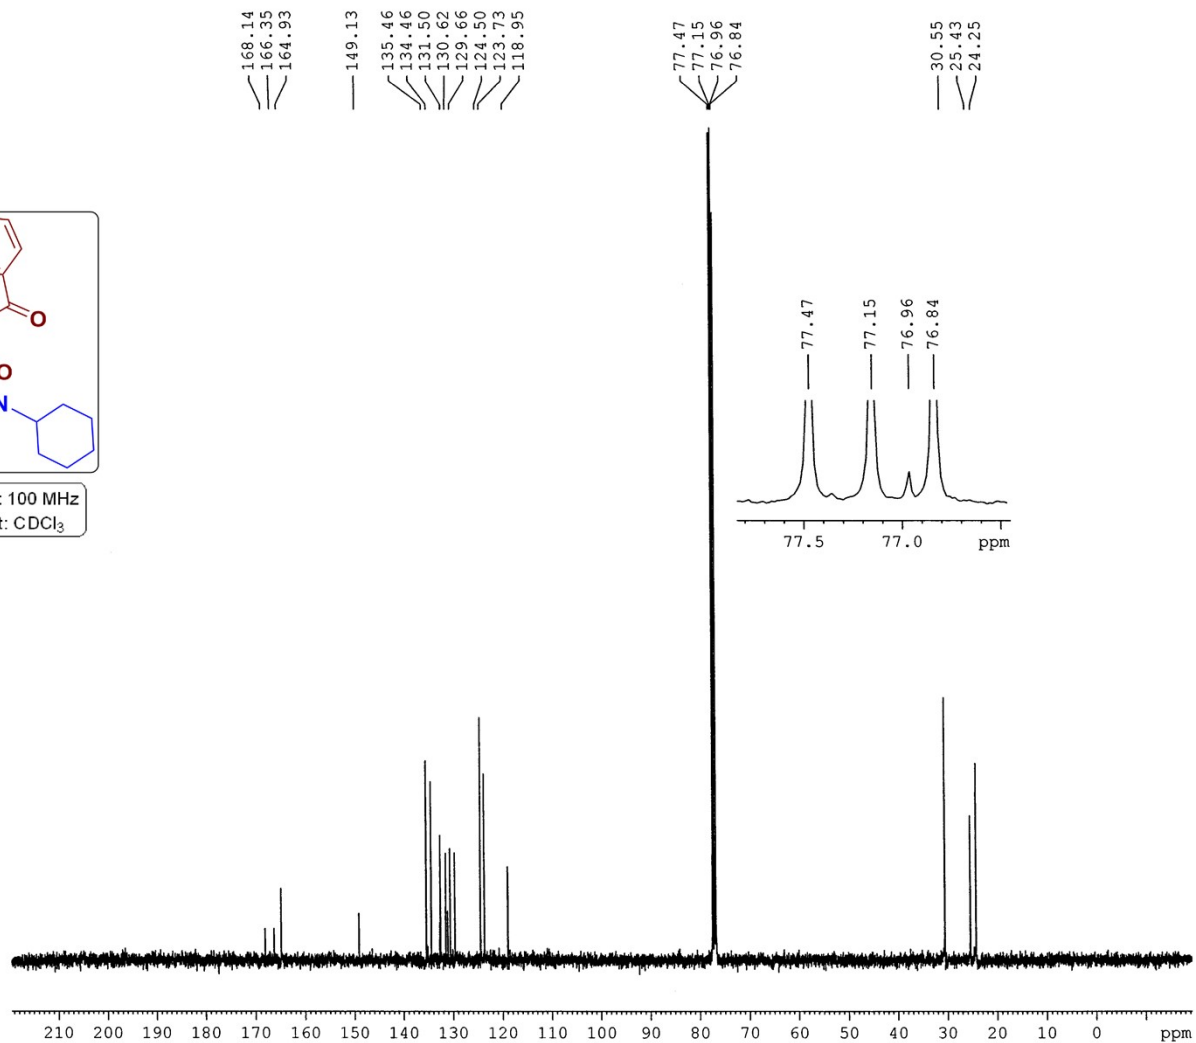

Current Data Parameters  
NAME Dr. A HAJRA-2025-13C  
EXPNO 347  
PROCNO 1

F2 - Acquisition Parameters  
Date\_ 20251017  
Time 21.40  
INSTRUM spect  
PROBHD 5 mm PABBO BB/  
PULPROG zgpg30  
TD 32768  
SOLVENT CDCl3  
NS 260  
DS 2  
SWH 24038.461 Hz  
FIDRES 0.733596 Hz  
AQ 0.6815744 sec  
RG 186.42  
DW 20.800 usec  
DE 6.50 usec  
TE 291.1 K  
D1 2.00000000 sec  
D11 0.03000000 sec  
TDO 1

----- CHANNEL f1 -----  
SFO1 100.6278588 MHz  
NUC1 13C  
P1 8.90 usec  
PLW1 54.00000000 W

----- CHANNEL f2 -----  
SFO2 400.1516006 MHz  
NUC2 1H  
CPDPRG[2] waltz16  
PCPD2 90.00 usec  
PLW2 12.00000000 W  
PLW12 0.32231000 W  
PLW13 0.16212000 W

F2 - Processing parameters  
SI 16384  
SF 100.6177887 MHz  
WDW EM  
SSB 0  
LB 1.00 Hz  
GB 0  
PC 1.40

7.912  
7.899  
7.889  
7.877  
7.851  
7.843  
7.837  
7.829  
7.820  
7.760  
7.750  
7.743  
7.737  
7.729  
7.520  
7.501  
7.457  
7.451  
7.437  
7.431  
7.381  
7.374  
7.359  
7.355  
7.339  
7.332  
7.325  
7.307  
7.289  
7.260  
7.245  
7.225  
7.207

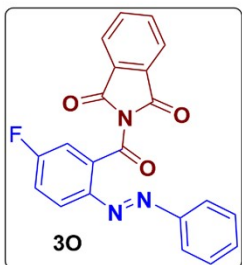

<sup>1</sup>H NMR: 400 MHz  
Solvent: CDCl<sub>3</sub>

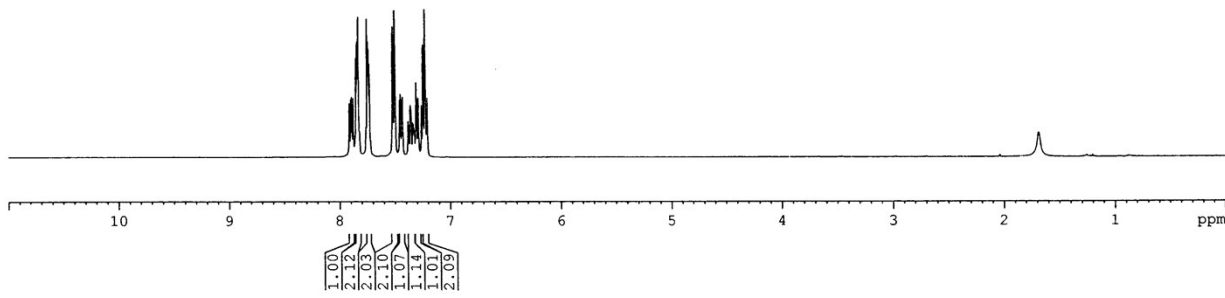

Current Data Parameters  
NAME Dr. A HAJRA 2025 1H  
EXPNO 390  
PROCNO 1

F2 - Acquisition Parameters  
Date\_ 20250712  
Time\_ 19.15  
INSTRUM spect  
PROBHD 5 mm PABBO BB/  
PULPROG zg30  
TD 32768  
SOLVENT CDCl3  
NS 8  
DS 2  
SWH 8223.685 Hz  
FIDRES 0.250967 Hz  
AQ 1.9922944 sec  
RG 87.66  
DW 60.800 usec  
DE 6.50 usec  
TE 295.4 K  
D1 1.00000000 sec  
TD0 1

==== CHANNEL f1 =====  
SF01 400.1524711 MHz  
NUC1 1H  
P1 14.75 usec  
PLW1 12.00000000 W

F2 - Processing parameters  
SI 16384  
SF 400.1500098 MHz  
WDW EM  
SSB 0  
LB 0.30 Hz  
GB 0  
PC 1.00

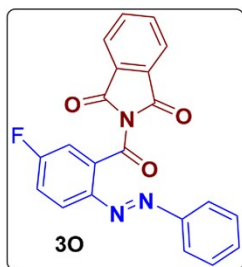

$^{13}\text{C}$  NMR : 100 MHz  
Solvent:  $\text{CDCl}_3$

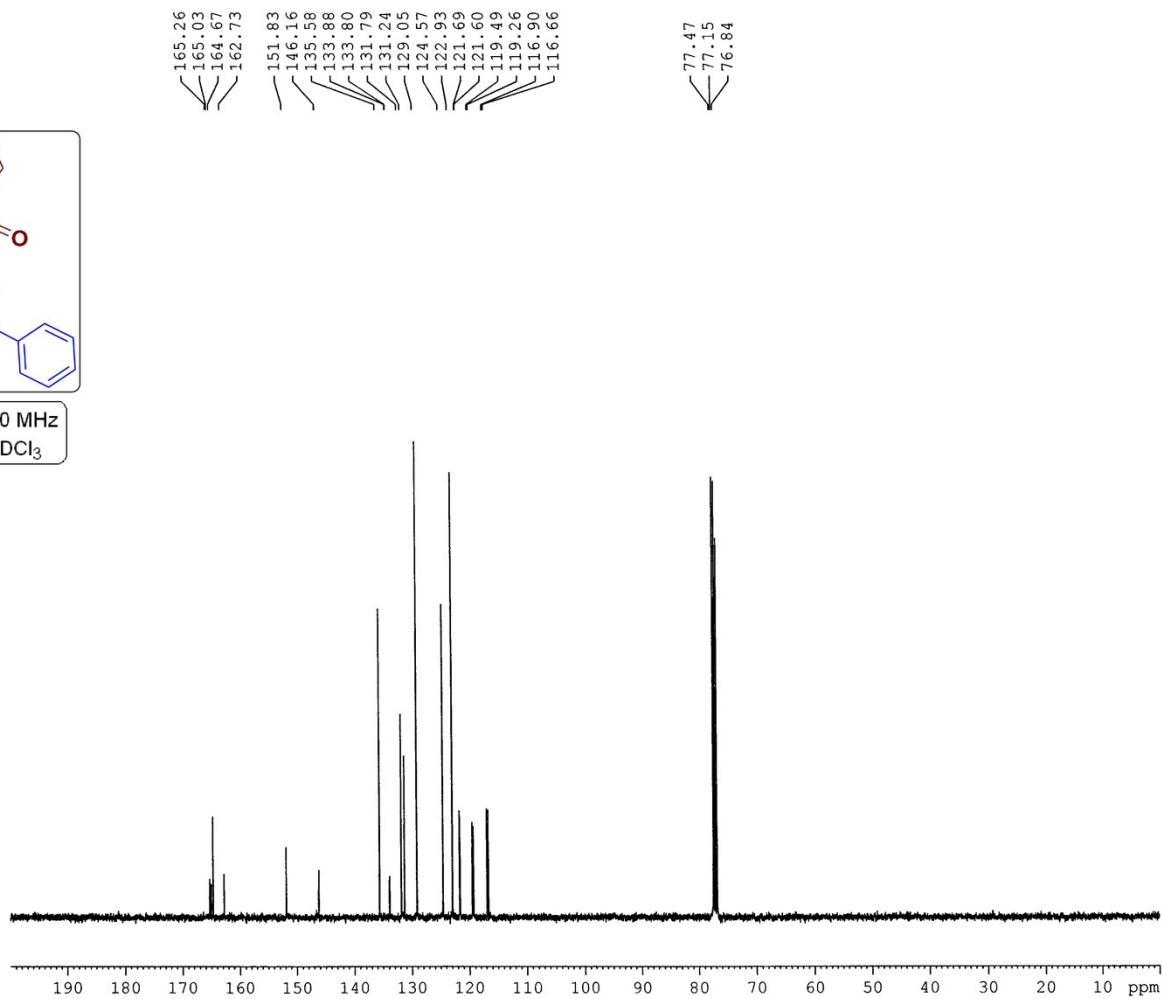

Current Data Parameters  
NAME Dr. A HAJRA-2025-13C  
EXPNO 225  
PROCNO 1

F2 - Acquisition Parameters  
Date\_ 20250712  
Time 19.35  
INSTRUM spect  
PROBHD 5 mm PABBO BB/  
PULPROG zgpg30  
TD 32768  
SOLVENT CDCl3  
NS 310  
DS 2  
SWH 24038.461 Hz  
FIDRES 0.733596 Hz  
AQ 0.6815744 sec  
RG 186.42  
DW 20.800 usec  
DE 6.50 usec  
TE 296.3 K  
D1 2.00000000 sec  
D11 0.03000000 sec  
TDO 1

===== CHANNEL f1 =====  
SFO1 100.6278588 MHz  
NUC1 13C  
P1 8.90 usec  
PLW1 54.00000000 W

===== CHANNEL f2 =====  
SFO2 400.1516006 MHz  
NUC2 1H  
CPDPRG12 waltz16  
PCPD2 90.00 usec  
PLW2 12.00000000 W  
PLW12 0.32231000 W  
PLW13 0.16212000 W

F2 - Processing parameters  
SI 16384  
SF 100.6177887 MHz  
WDW EM  
SSB 0  
LB 1.00 Hz  
GB 0  
PC 1.40

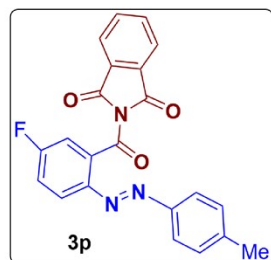

<sup>1</sup>H NMR: 400 MHz  
Solvent: CDCl<sub>3</sub>

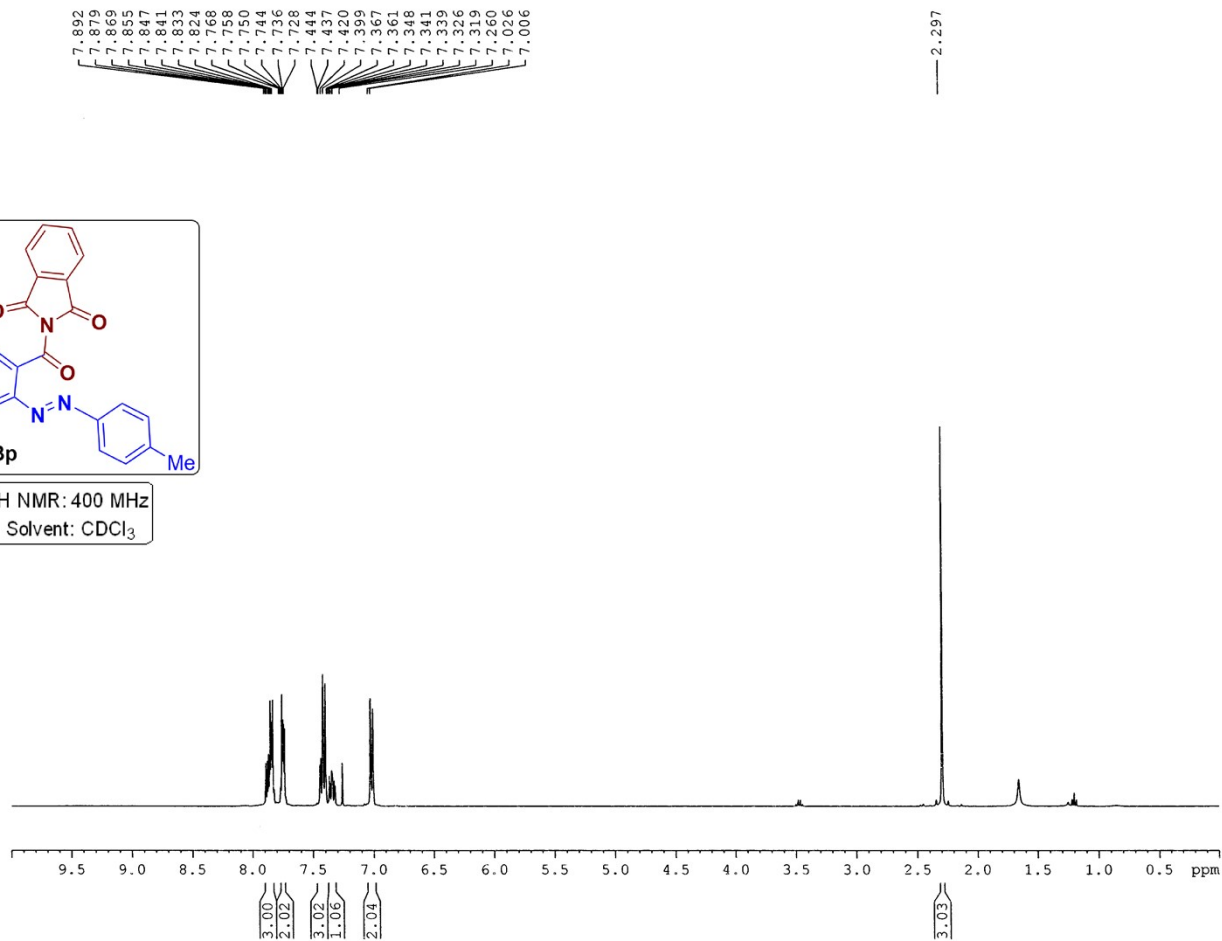

Current Data Parameters  
NAME Dr. A HAJRA 2025 1H  
EXPNO 264  
PROCNO 1

F2 - Acquisition Parameters  
Date\_ 20250506  
Time 10.13  
INSTRUM spect  
PROBHD 5 mm PABBO BB/  
PULPROG zg30  
TD 32768  
SOLVENT CDCl3  
NS 8  
DS 2  
SWH 8223.685 Hz  
FIDRES 0.250967 Hz  
AQ 1.9922944 sec  
RG 87.66  
DW 60.800 usec  
DE 6.50 usec  
TE 298.3 K  
D1 1.00000000 sec  
TD0 1

==== CHANNEL f1 =====  
SFO1 400.1524711 MHz  
NUC1 1H  
P1 14.75 usec  
PLW1 12.00000000 W

F2 - Processing parameters  
SI 16384  
SF 400.1500097 MHz  
WDW EM  
SSB 0  
LB 0.30 Hz  
GB 0  
PC 1.00

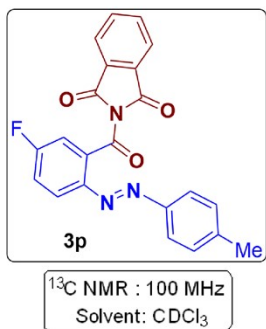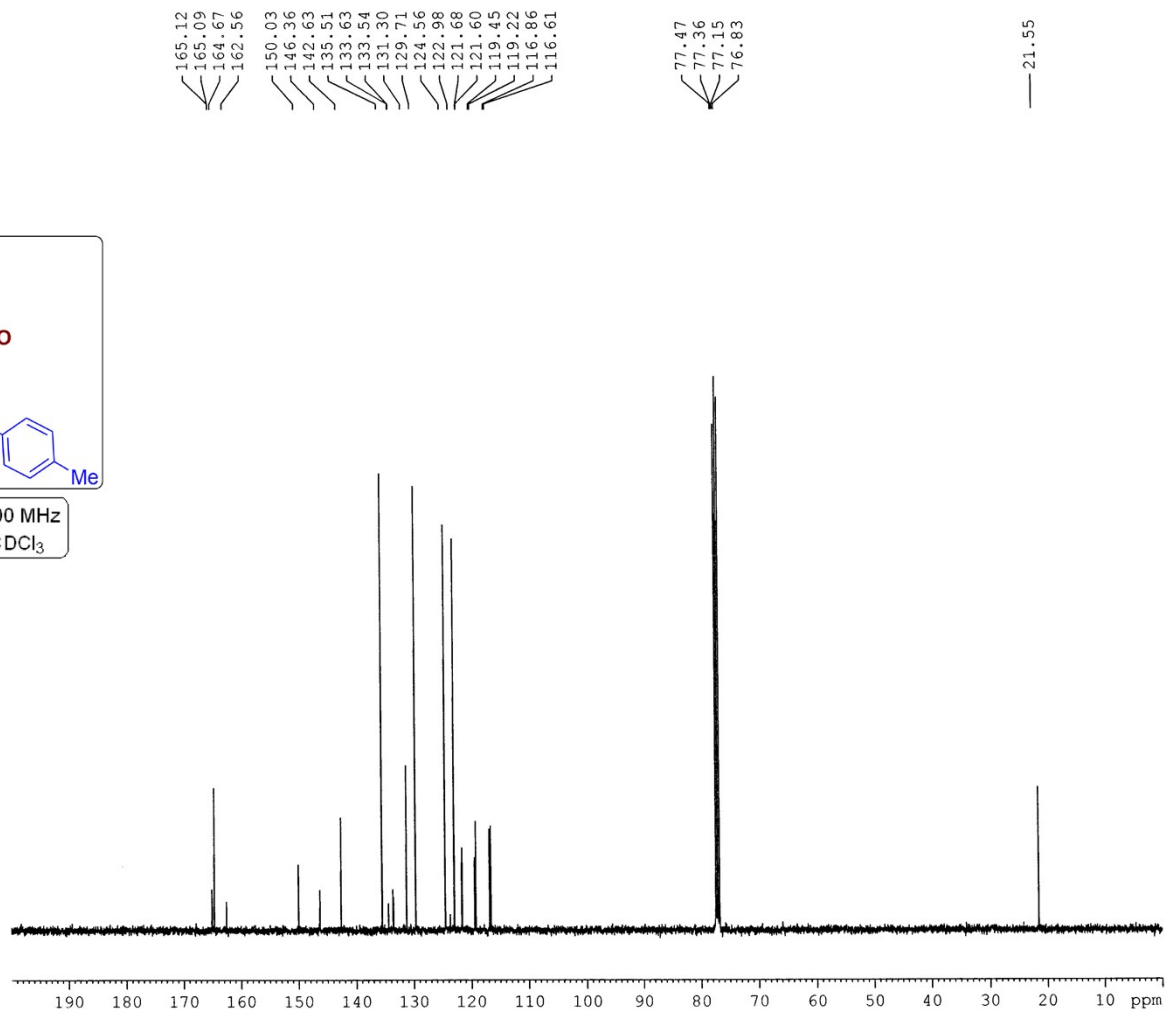

Current Data Parameters  
NAME Dr. A HAJRA-2025-13C  
EXPNO 157  
PROCNO 1

F2 - Acquisition Parameters  
Date\_ 20250506  
Time 10.56  
INSTRUM spect  
PROBHD 5 mm PABBO BB/  
PULPROG zgpg30  
TD 32768  
SOLVENT CDCl3  
NS 450  
DS 2  
SWH 24038.461 Hz  
FIDRES 0.733596 Hz  
AQ 0.6815744 sec  
RG 186.42  
DW 20.800 usec  
DE 6.50 usec  
TE 298.4 K  
D1 2.00000000 sec  
D11 0.03000000 sec  
TD0 1

===== CHANNEL f1 =====  
SFO1 100.6278588 MHz  
NUC1 13C  
P1 8.90 usec  
PLW1 54.00000000 W

===== CHANNEL f2 =====  
SFO2 400.1516006 MHz  
NUC2 1H  
CPDPRG12 waltz16  
PCPD2 90.00 usec  
PLW2 12.00000000 W  
PLW12 0.32231000 W  
PLW13 0.16212000 W

F2 - Processing parameters  
SI 16384  
SF 100.6177873 MHz  
WDW EM  
SSB 0  
LB 1.00 Hz  
GB 0  
PC 1.40

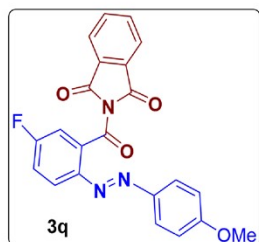

<sup>1</sup>H NMR: 400 MHz  
Solvent: CDCl<sub>3</sub>

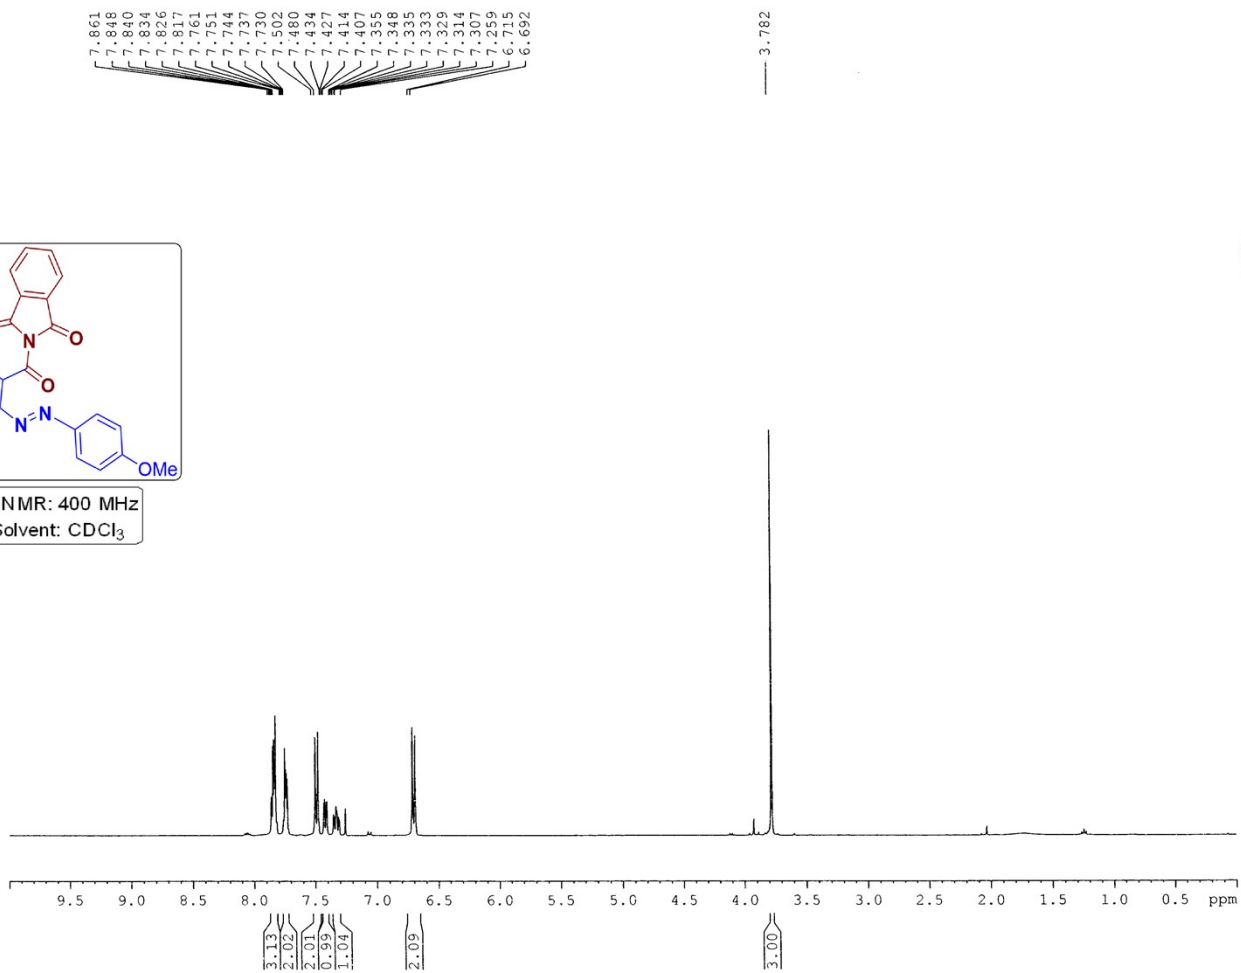

Current Data Parameters  
NAME Dr. A HAJRA 2025 1H  
EXPNO 141  
PROCNO 1

F2 - Acquisition Parameters  
Date\_ 20250225  
Time 12.39  
INSTRUM spect  
PROBHD 5 mm PABBO BB/  
PULPROG zg30  
TD 32768  
SOLVENT CDCl3  
NS 8  
DS 2  
SWH 8223.685 Hz  
FIDRES 0.250967 Hz  
AQ 1.9922944 sec  
RG 77.59  
DW 60.800 usec  
DE 6.50 usec  
TE 294.2 K  
D1 1.00000000 sec  
TD0 1

===== CHANNEL f1 =====  
SF01 400.1524711 MHz  
NUC1 1H  
P1 14.75 usec  
PLW1 12.00000000 W

F2 - Processing parameters  
SI 16384  
SF 400.1500098 MHz  
WDW EM  
SSB 0  
LB 0.30 Hz  
GB 0  
PC 1.00

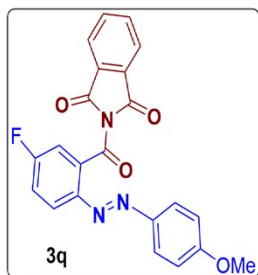

<sup>13</sup>C NMR : 100 MHz  
Solvent: CDCl<sub>3</sub>

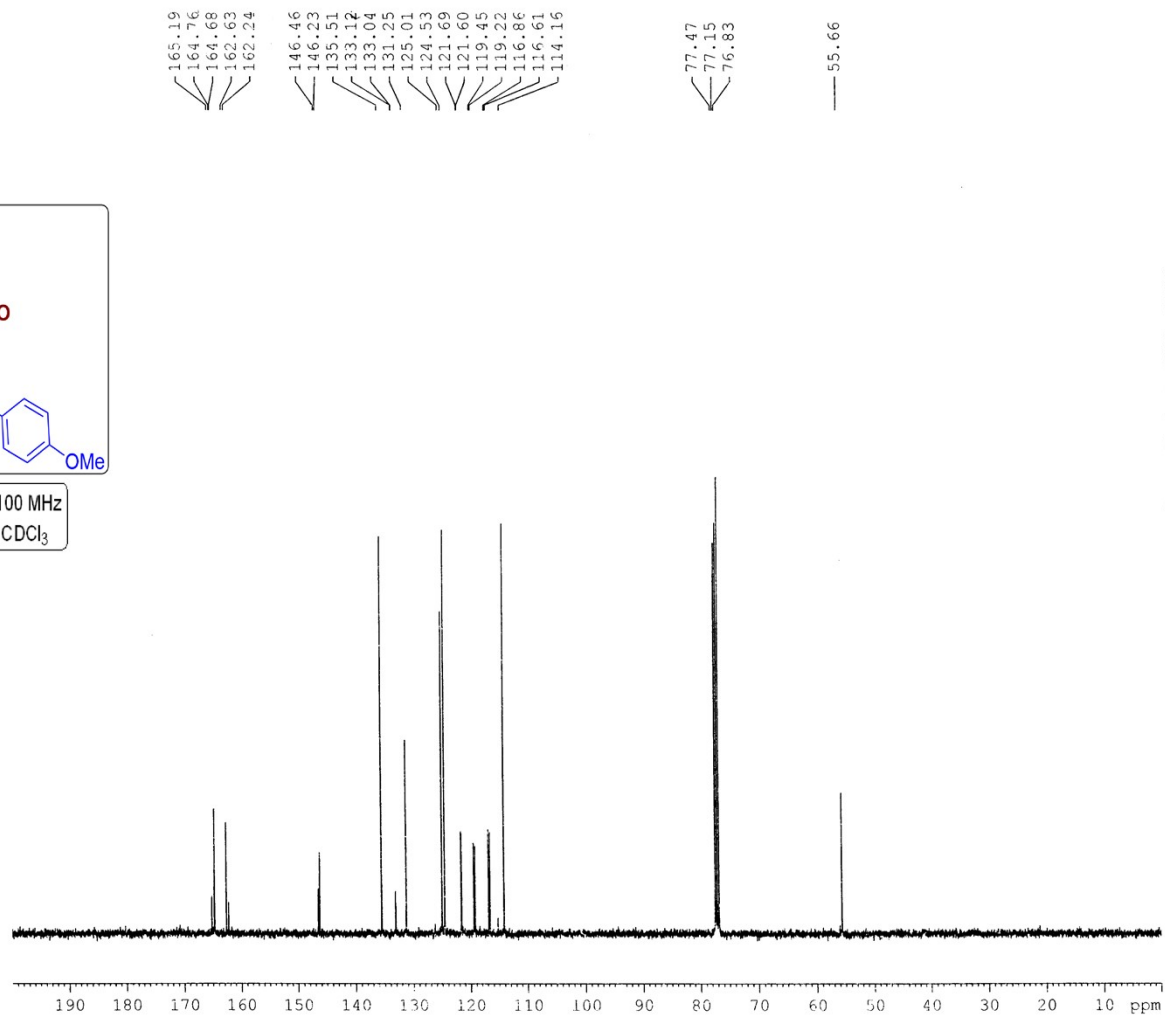

Current Data Parameters  
NAME Dr. A HAJRA-2025-13C  
EXPNO 111  
PROCNO 1

F2 - Acquisition Parameters  
Date\_ 20250225  
Time\_ 12.55  
INSTRUM spect  
PROBHD 5 mm PABBO BE/  
PULPROG zgpg30  
TE 327.66  
SOLVENT CDCl3  
NS 270  
DS 2  
SWH 24038.461 Hz  
FIDRES 0.733596 Hz  
AQ 0.6615744 sec  
RG 186.42  
DW 20.800 usec  
DE 6.50 usec  
TE 294.7 K  
D1 2.0000000 sec  
D11 0.0300000 sec  
TDC 1

===== CHANNEL f1 =====  
SFO1 100.6278586 MHz  
NUC1 13C  
P1 8.90 usec  
PLW1 54.00060000 W

===== CHANNEL f2 =====  
SFO2 400.1516006 MHz  
NUC2 1H  
CPDPRG1? waltz16  
PCPD2 90.00 usec  
PLW2 12.00000000 W  
PLW12 0.32231000 W  
PLW13 0.16212000 W

F2 - Processing parameters  
SI 16384  
SF 100.6177901 MHz  
WDW EM  
SCB 0  
LB 1.00 Hz  
GB 0  
PC 1.40

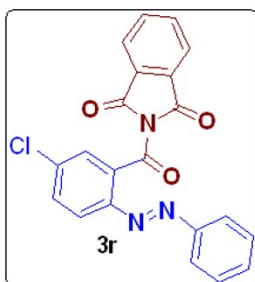

<sup>1</sup>H NMR : 400 MHz  
Solvent : CDCl<sub>3</sub>

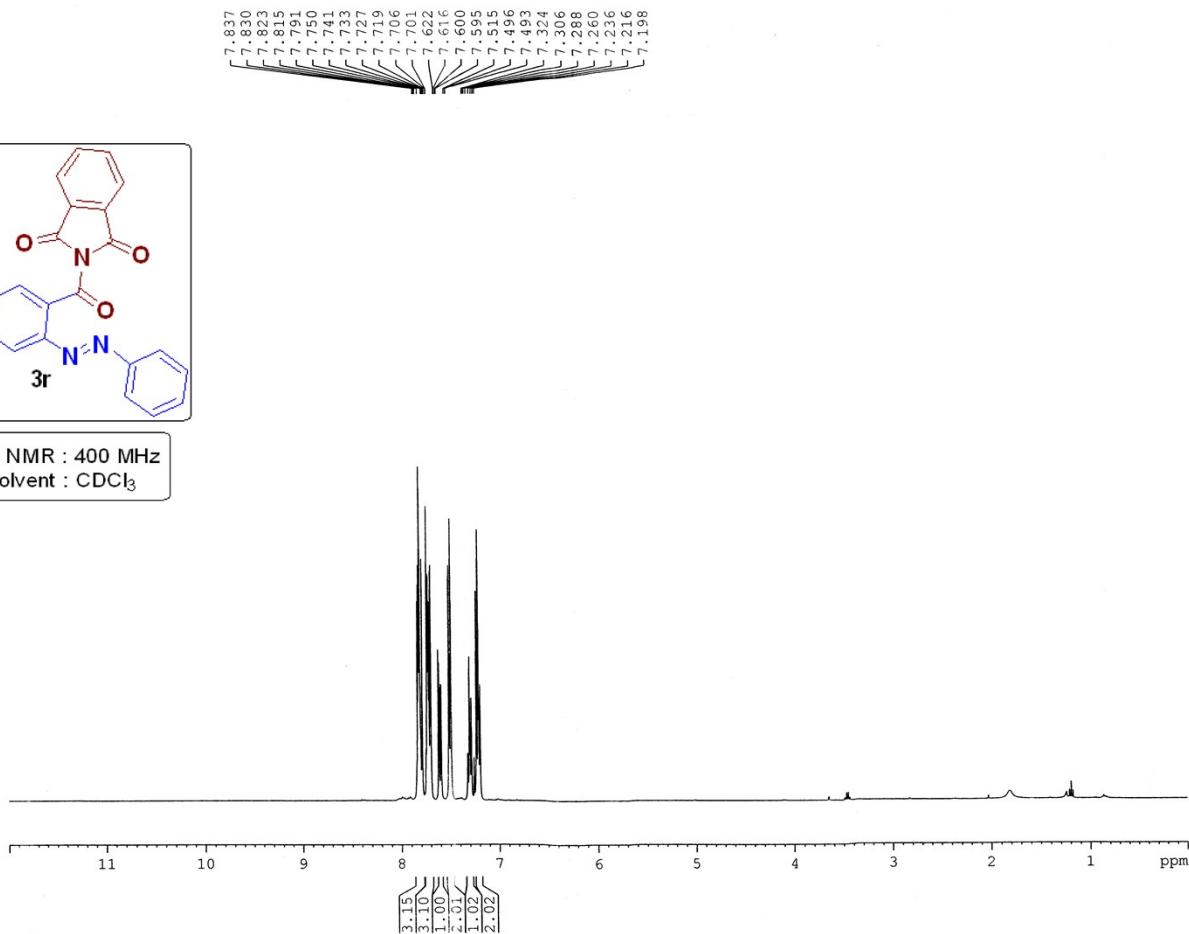

7.837  
7.830  
7.823  
7.815  
7.791  
7.750  
7.741  
7.733  
7.727  
7.719  
7.706  
7.701  
7.622  
7.616  
7.600  
7.595  
7.515  
7.496  
7.493  
7.324  
7.306  
7.288  
7.260  
7.236  
7.216  
7.196

Current Data Parameters  
NAME Dr. A HAJRA 2026 1H  
EXPNO 240  
PROCNO 1

F2 - Acquisition Parameters  
Date\_ 20260407  
Time\_ 20.00  
INSTRUM spect  
PROBHD 5 mm PABBO BB/  
PULPROG zg30  
TD 32768  
SOLVENT CDCl3  
NS 8  
DS 2  
SWH 8223.685 Hz  
FIDRES 0.250967 Hz  
AQ 1.9922944 sec  
RG 67.81  
DW 60.800 usec  
DE 6.50 usec  
TE 292.0 K  
D1 1.00000000 sec  
TDO 1

===== CHANNEL f1 =====  
SFO1 400.1524711 MHz  
NUC1 1H  
P1 14.75 usec  
PLW1 12.00000000 W

F2 - Processing parameters  
SI 16384  
SF 400.1500097 MHz  
WDW EM  
SSB 0  
LB 0.30 Hz  
GB 0  
PC 1.00

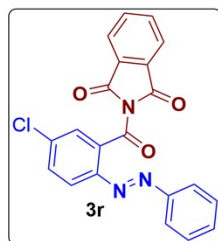

<sup>13</sup>C NMR : 100 MHz  
Solvent : CDCl<sub>3</sub>

164.98  
164.64  
151.75  
147.92  
137.30  
135.60  
133.03  
132.39  
132.02  
131.12  
129.66  
129.06  
124.56  
123.00  
120.74  
77.47  
77.15  
76.83

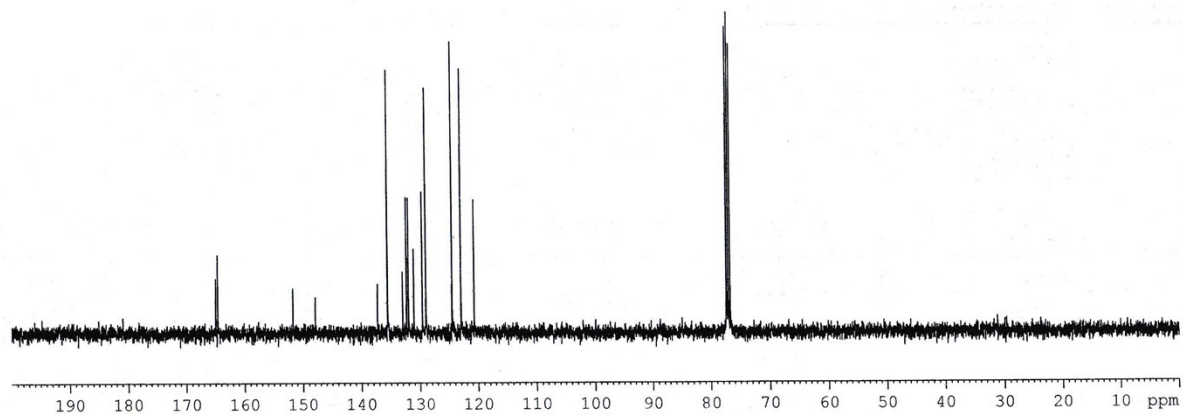

Current Data Parameters  
NAME Dr. A HAJRA-2026-13C  
EXPNO 151  
PROCNO 1

F2 - Acquisition Parameters  
Date\_ 20260501  
Time 17.18  
INSTRUM spect  
PROBHD 5 mm PABBO BB/  
PULPROG zgpg30  
TD 32768  
SOLVENT CDCl3  
NS 30  
DS 2  
SWH 24038.461 Hz  
FIDRES 0.733596 Hz  
AQ 0.6815744 sec  
RG 186.42  
DW 20.800 usec  
DE 6.50 usec  
TE 290.1 K  
D1 2.00000000 sec  
D11 0.03000000 sec  
TD0 1

===== CHANNEL f1 =====  
SFO1 100.6278588 MHz  
NUC1 13C  
P1 8.90 usec  
PLW1 54.00000000 W

===== CHANNEL f2 =====  
SFO2 400.1516006 MHz  
NUC2 1H  
CPDPRG[2] waltz16  
PCPD2 90.00 usec  
PLW2 12.00000000 W  
PLW12 0.32231000 W  
PLW13 0.16212000 W

F2 - Processing parameters  
SI 16384  
SF 100.6177932 MHz  
WDW EM  
SSB 0  
LB 1.00 Hz  
GB 0  
PC 1.40

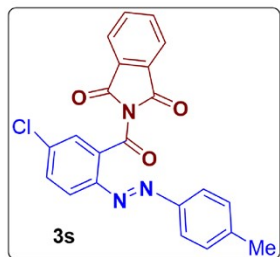

<sup>1</sup>H NMR: 400 MHz  
Solvent: CDCl<sub>3</sub>

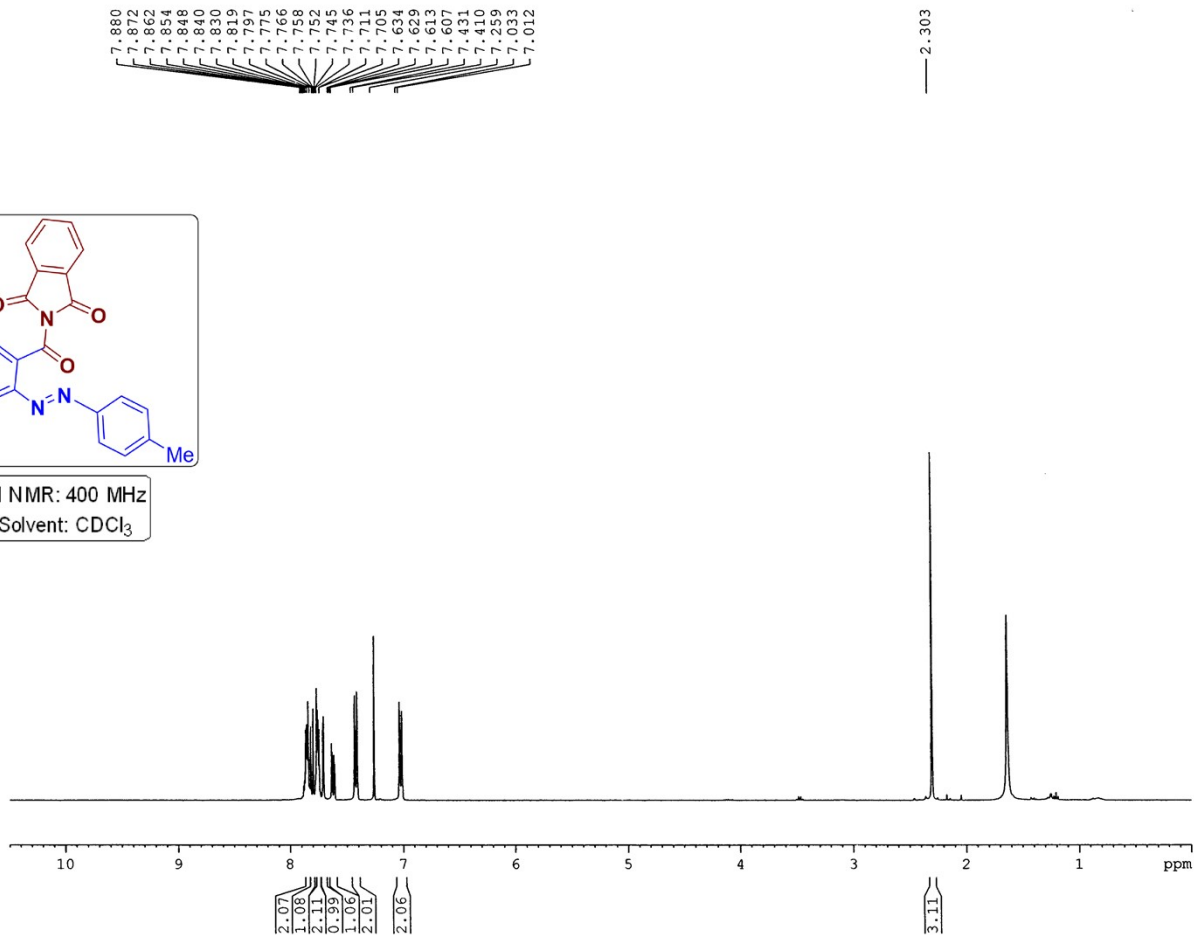

Current Data Parameters  
NAME Dr. A HAJRA 2025 1H  
EXPNO 466  
PROCNO 1

F2 - Acquisition Parameters  
Date\_ 20250802  
Time 11.19  
INSTRUM spect  
PROBHD 5 mm PABBO BB/  
PULPROG zg30  
TD 32768  
SOLVENT CDCl3  
NS 8  
DS 2  
SWH 8223.685 Hz  
FIDRES 0.250967 Hz  
AQ 1.9922944 sec  
RG 168.31  
DW 60.800 usec  
DE 6.50 usec  
TE 291.8 K  
D1 1.00000000 sec  
TD0 1

----- CHANNEL f1 -----  
SF01 400.1524711 MHz  
NUC1 1H  
P1 14.75 usec  
PLW1 12.00000000 W

F2 - Processing parameters  
SI 16384  
SF 400.1500099 MHz  
WDW EM  
SSB 0  
LB 0.30 Hz  
GB 0  
PC 1.00

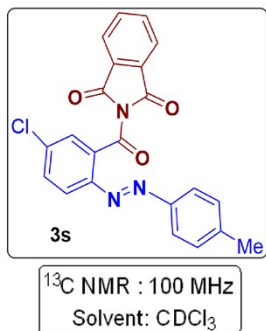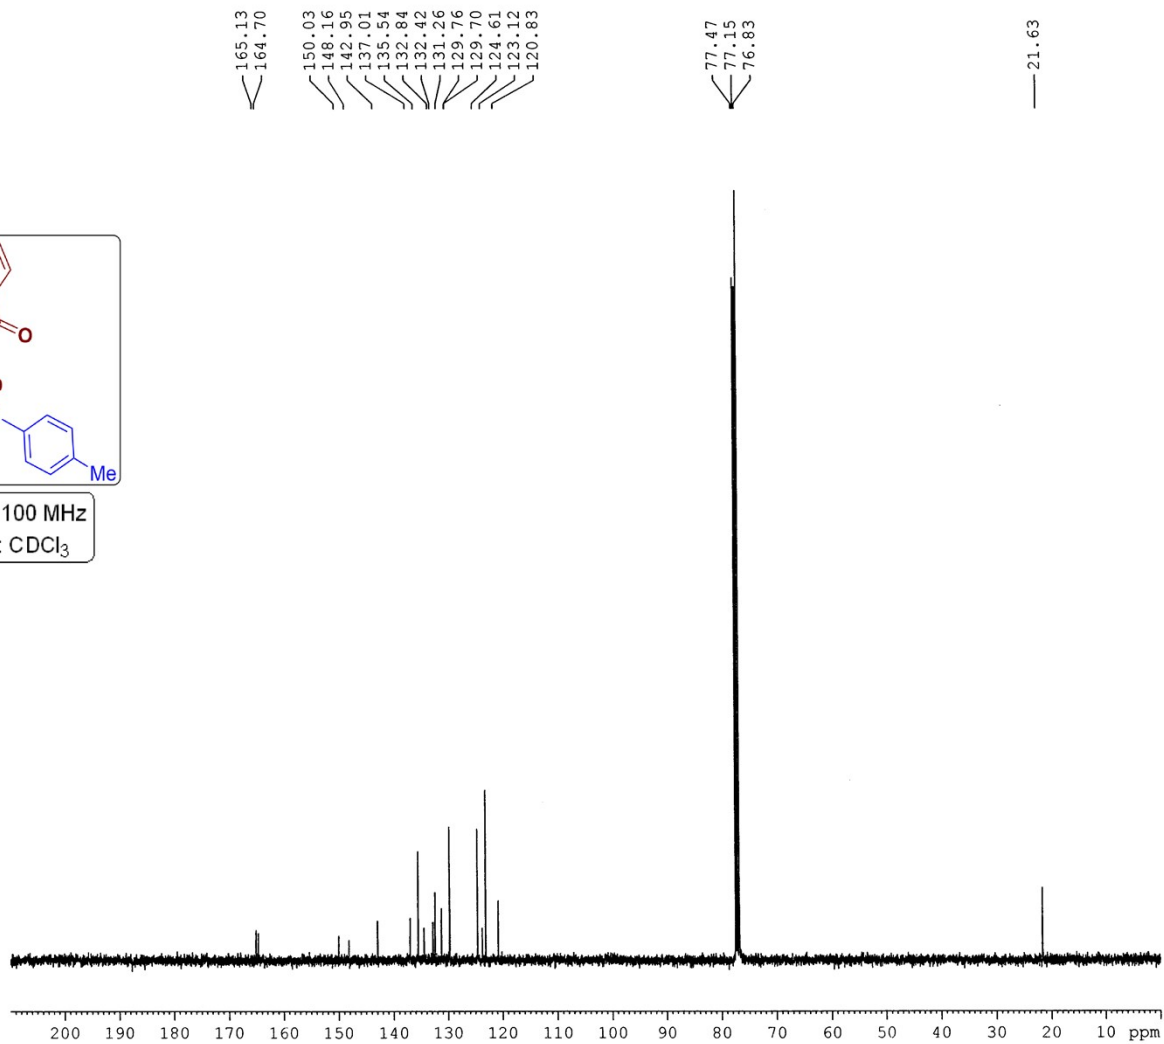

Current Data Parameters  
 NAME Dr. A HAJRA-2025-13C  
 EXPNO 269  
 PROCNO 1

F2 - Acquisition Parameters  
 Date\_ 20250802  
 Time 11.47  
 INSTRUM spect  
 PROBHD 5 mm PABBO BB/  
 PULPROG zgpg30  
 TD 32768  
 SOLVENT CDCl3  
 NS 490  
 DS 2  
 SWH 24038.461 Hz  
 FIDRES 0.733596 Hz  
 AQ 0.6815744 sec  
 RG 186.42  
 DW 20.800 usec  
 DE 6.50 usec  
 TE 292.2 K  
 D1 2.0000000 sec  
 D11 0.03000000 sec  
 TDO 1

----- CHANNEL f1 -----  
 SFO1 100.6278588 MHz  
 NUC1 13C  
 P1 8.90 usec  
 PLW1 54.00000000 W

----- CHANNEL f2 -----  
 SFO2 400.1516006 MHz  
 NUC2 1H  
 CPDPRG2 waltz16  
 PCPD2 90.00 usec  
 PLW2 12.00000000 W  
 PLW12 0.32231000 W  
 PLW13 0.16212000 W

F2 - Processing parameters  
 SI 16384  
 SF 100.6177870 MHz  
 WDW EM  
 SSB 0  
 LB 1.00 Hz  
 GB 0  
 PC 1.40

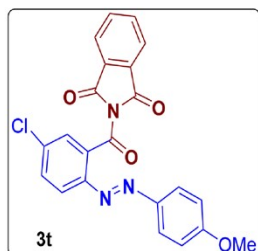

<sup>1</sup>H NMR: 400 MHz  
Solvent: CDCl<sub>3</sub>

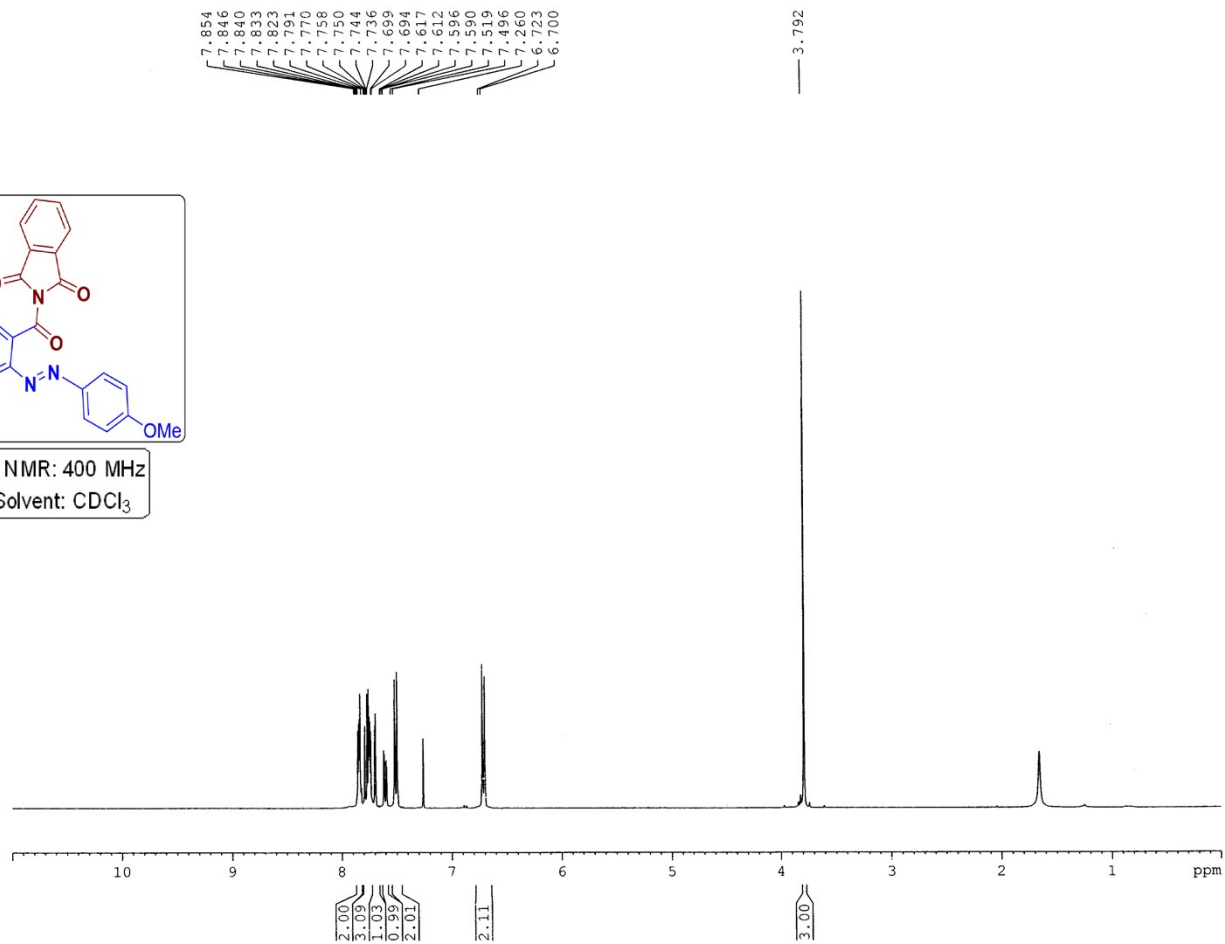

Current Data Parameters  
NAME Dr. A HAJRA 2025 1H  
EXPNO 439  
PROCNO 1

F2 - Acquisition Parameters  
Date\_ 20250724  
Time 19.25  
INSTRUM spect  
PROBHD 5 mm PABBO BB/  
PULPROG zg30  
TD 32768  
SOLVENT CDCl3  
NS 8  
DS 2  
SWH 8223.685 Hz  
FIDRES 0.250967 Hz  
AQ 1.9922944 sec  
RG 135.7  
DW 60.800 usec  
DE 6.50 usec  
TE 292.2 K  
D1 1.00000000 sec  
TDO 1

===== CHANNEL f1 =====  
SF01 400.1524711 MHz  
NUC1 1H  
P1 14.75 usec  
PLW1 12.00000000 W

F2 - Processing parameters  
SI 16384  
SF 400.1500097 MHz  
WDW EM  
SSB 0  
LB 0.30 Hz  
GB 0  
PC 1.00

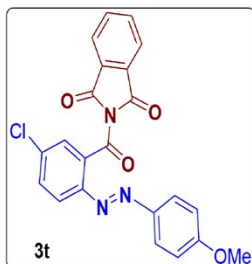

<sup>13</sup>C NMR : 100 MHz  
Solvent: CDCl<sub>3</sub>

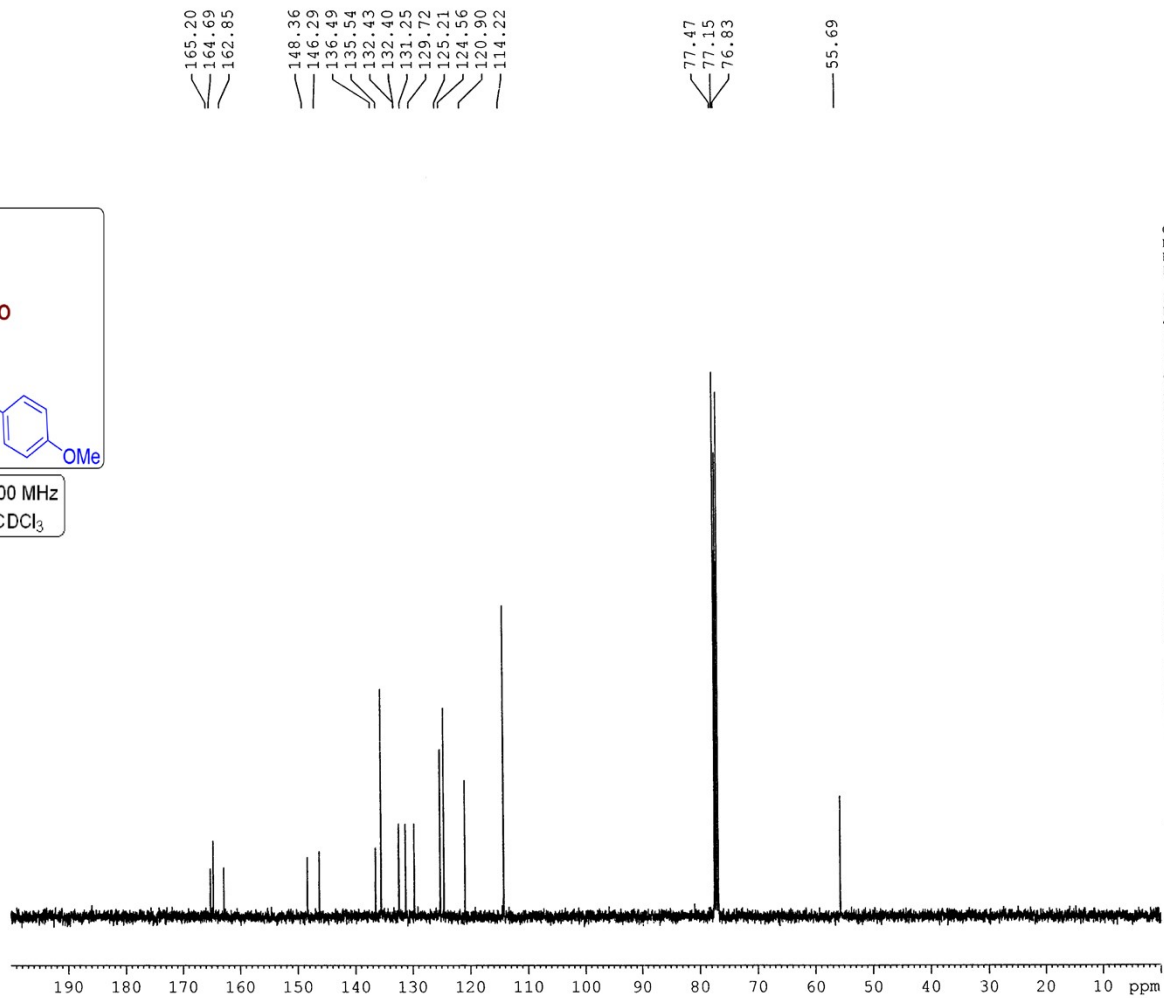

Current Data Parameters  
NAME Dr. A HAJRA-2025-13C  
EXPNO 255  
PROCNO 1

F2 - Acquisition Parameters  
Date 20250724  
Time 19.40  
INSTRUM spect  
PROBHD 5 mm PABBO BB/  
PULPROG zgpg30  
TD 32768  
SOLVENT CDCl3  
NS 190  
DS 2  
SWH 24038.461 Hz  
FIDRES 0.733596 Hz  
AQ 0.6915744 sec  
RG 186.42  
DW 20.800 usec  
DE 6.50 usec  
TE 292.7 K  
D1 2.0000000 sec  
D11 0.0300000 sec  
TDO 1

----- CHANNEL f1 -----  
SFO1 100.6278588 MHz  
NUC1 13C  
P1 8.90 usec  
PLW1 54.0000000 W

----- CHANNEL f2 -----  
SFO2 400.1516006 MHz  
NUC2 1H  
CPDPRG[2] waltz16  
PCPD2 90.00 usec  
PLW2 12.0000000 W  
PLW12 0.32231000 W  
PLW13 0.16212000 W

F2 - Processing parameters  
SI 16384  
SF 100.6177883 MHz  
WDW EM  
SSB 0  
LB 1.00 Hz  
GB 0  
PC 1.40

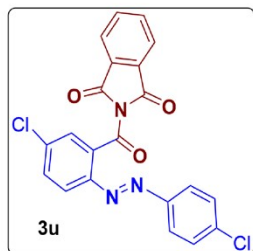

<sup>1</sup>H NMR: 400 MHz  
Solvent: CDCl<sub>3</sub>

7.866  
7.858  
7.852  
7.845  
7.835  
7.821  
7.800  
7.790  
7.782  
7.776  
7.768  
7.760  
7.710  
7.705  
7.643  
7.638  
7.622  
7.616  
7.499  
7.493  
7.489  
7.476  
7.471  
7.465  
7.259  
7.229  
7.224  
7.219  
7.207  
7.202

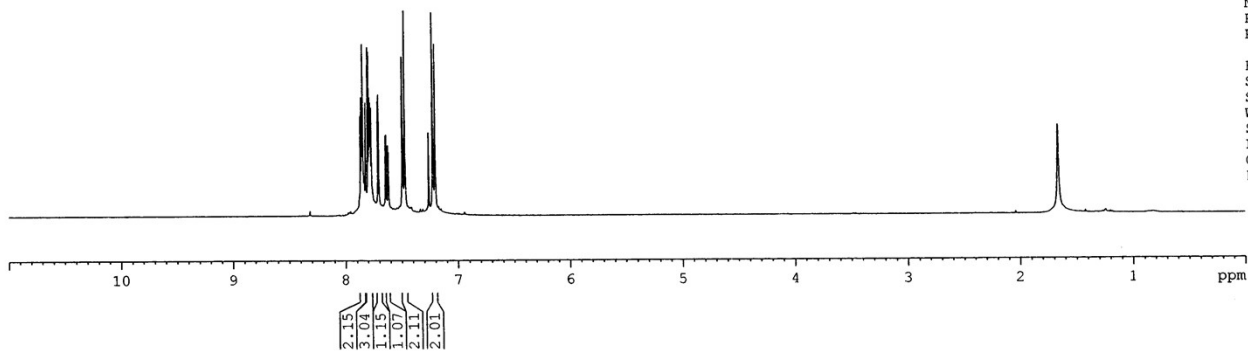

Current Data Parameters  
NAME Dr. A HAJRA 2025 1H  
EXPNO 449  
PROCNO 1

F2 - Acquisition Parameters  
Date\_ 20250726  
Time 19.02  
INSTRUM spect  
PROBHD 5 mm PABBO BB/  
PULPROG zg30  
TD 32768  
SOLVENT CDCl3  
NS 8  
DS 2  
SWH 8223.685 Hz  
FIDRES 0.250967 Hz  
AQ 1.9922944 sec  
RG 135.7  
DW 60.800 usec  
DE 6.50 usec  
TE 290.9 K  
D1 1.0000000 sec  
TD0 1

===== CHANNEL f1 =====  
SFO1 400.1524711 MHz  
NUC1 1H  
P1 14.75 usec  
PLW1 12.0000000 W

F2 - Processing parameters  
SI 16384  
SF 400.1500100 MHz  
WDW EM  
SSB 0  
LB 0.30 Hz  
GB 0  
PC 1.00

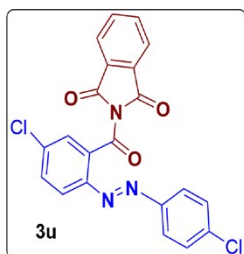

<sup>13</sup>C NMR : 100 MHz  
Solvent: CDCl<sub>3</sub>

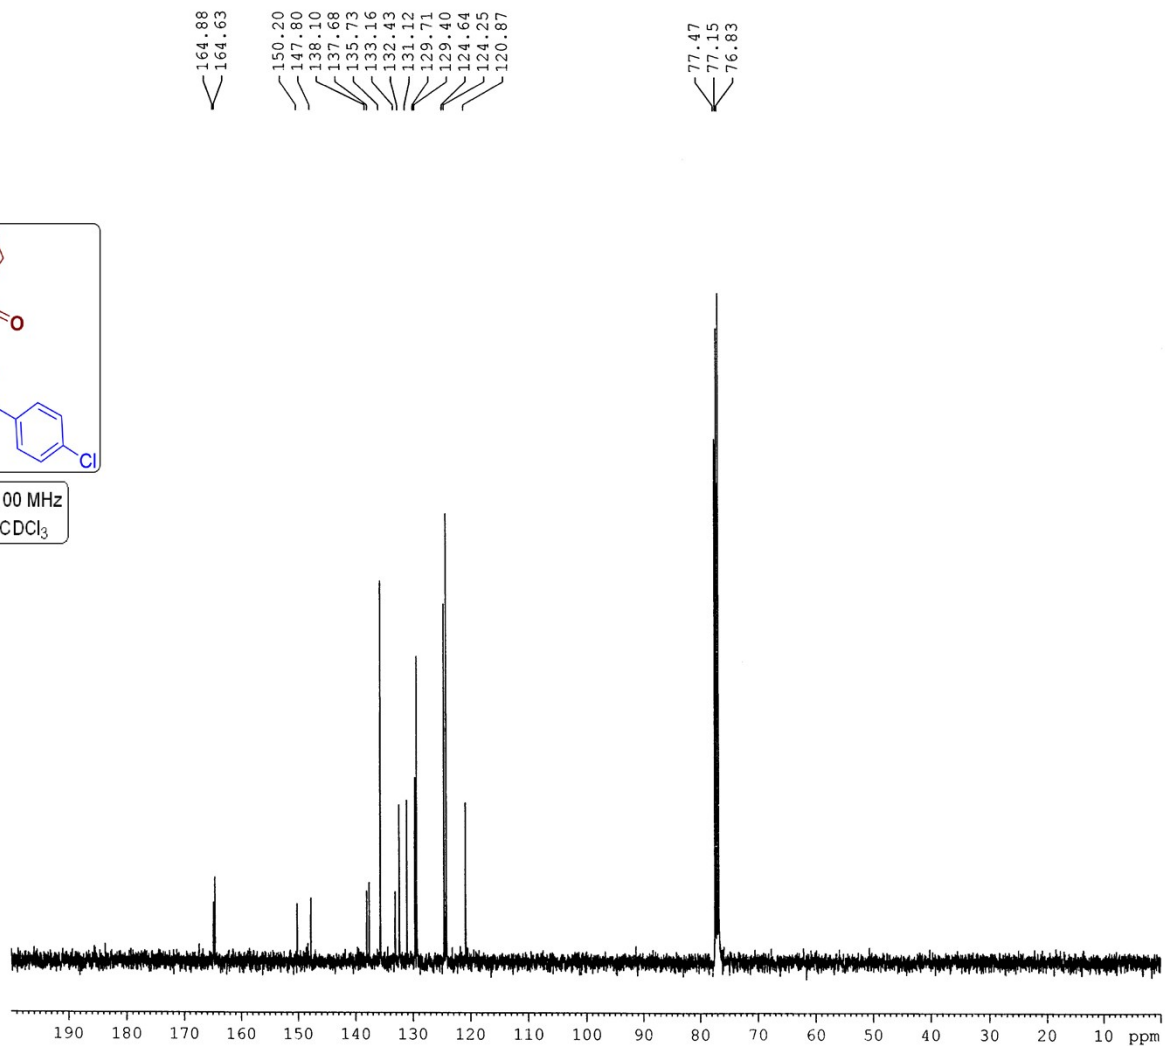

```

Current Data Parameters
NAME      Dr. A HAJRA-2025-13C
EXPNO    260
PROCNO   1

F2 - Acquisition Parameters
Date_    20250726
Time     19.18
INSTRUM  spect
PROBHD   5 mm PABBO BB/
PULPROG  zgpg30
TD       32768
SOLVENT  CDCl3
NS       230
DS       2
SWH      24038.461 Hz
FIDRES   0.733596 Hz
AQ       0.6815744 sec
RG       186.42
DW       20.800 usec
DE       6.50 usec
TE       292.0 K
D1       2.0000000 sec
D11      0.0300000 sec
TD0      1

===== CHANNEL f1 =====
SFO1     100.6278588 MHz
NUC1     13C
P1       8.90 usec
PLW1     54.0000000 W

===== CHANNEL f2 =====
SFO2     400.1516006 MHz
NUC2     1H
CPDPRGf2  waltz16
PCPD2    90.00 usec
PLW2     12.0000000 W
PLW12    0.3223100 W
PLW13    0.1621200 W

F2 - Processing parameters
SI       16384
SF       100.6177889 MHz
WDW      EM
SSB      0
LB       1.00 Hz
GB       0
PC       1.40

```

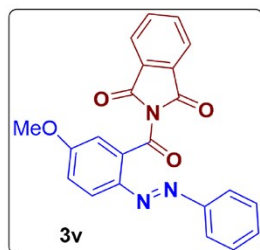

<sup>1</sup>H NMR: 400 MHz  
Solvent: CDCl<sub>3</sub>

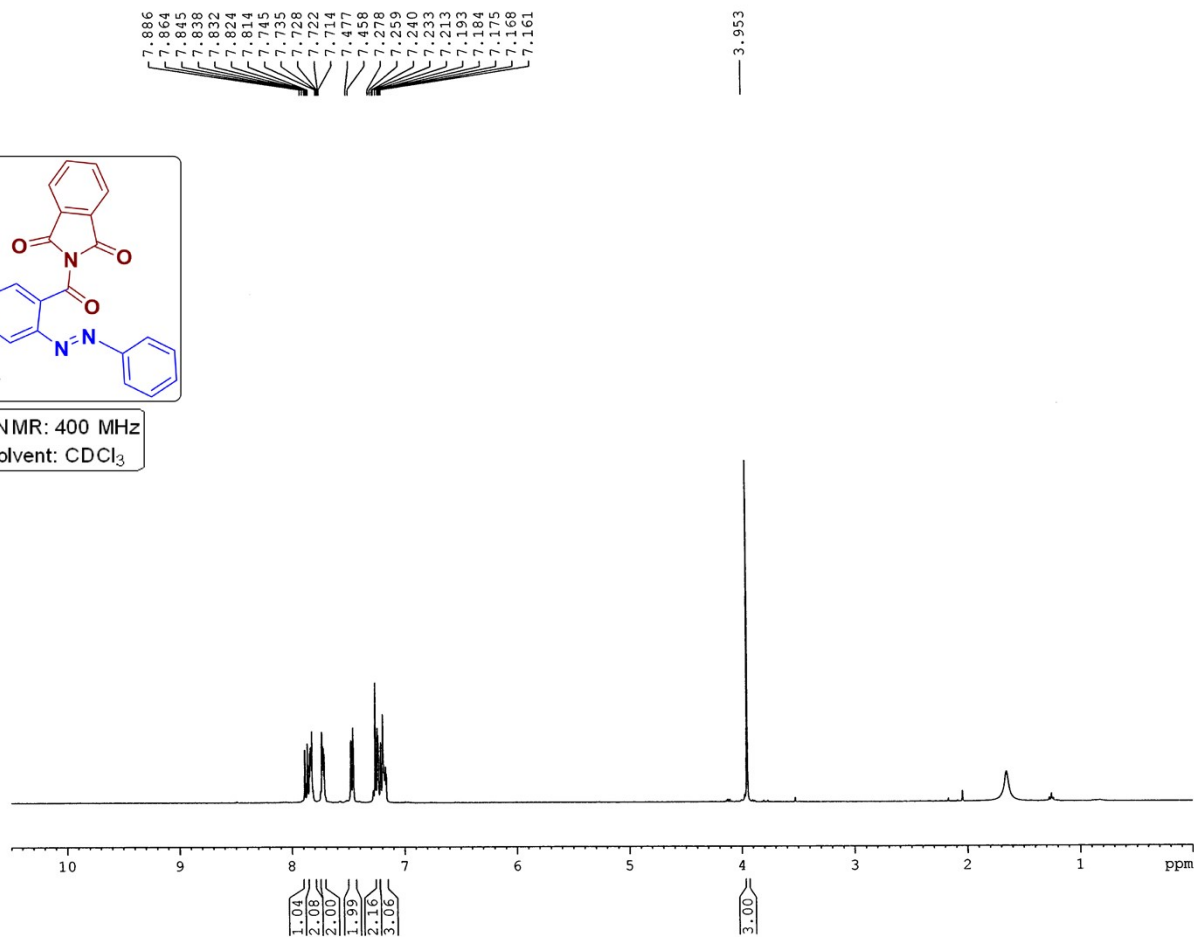

Current Data Parameters  
NAME Dr. A HAJRA 2025 1H  
EXPNO 465  
PROCNO 1

F2 - Acquisition Parameters  
Date\_ 20250802  
Time\_ 10.53  
INSTRUM spect  
PROBHD 5 mm PABBO BB/  
PULPROG zg30  
TD 32768  
SOLVENT CDCl3  
NS 8  
DS 2  
SWH 8223.685 Hz  
FIDRES 0.250967 Hz  
AQ 1.9922944 sec  
RG 168.31  
DW 60.800 usec  
DE 6.50 usec  
TE 292.0 K  
D1 1.00000000 sec  
TD0 1

===== CHANNEL f1 =====  
SF01 400.1524711 MHz  
NUC1 1H  
P1 14.75 usec  
PLW1 12.00000000 W

F2 - Processing parameters  
SI 16384  
SF 400.1500098 MHz  
WDW EM  
SSB 0  
LB 0.30 Hz  
GB 0  
PC 1.00

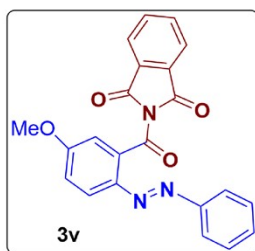

<sup>13</sup>C NMR : 100 MHz  
Solvent: CDCl<sub>3</sub>

166.29  
164.88  
162.05  
152.04  
143.89  
135.42  
133.62  
131.38  
131.05  
128.93  
124.50  
122.65  
121.19  
118.44  
114.11

77.47  
77.15  
76.83

56.04

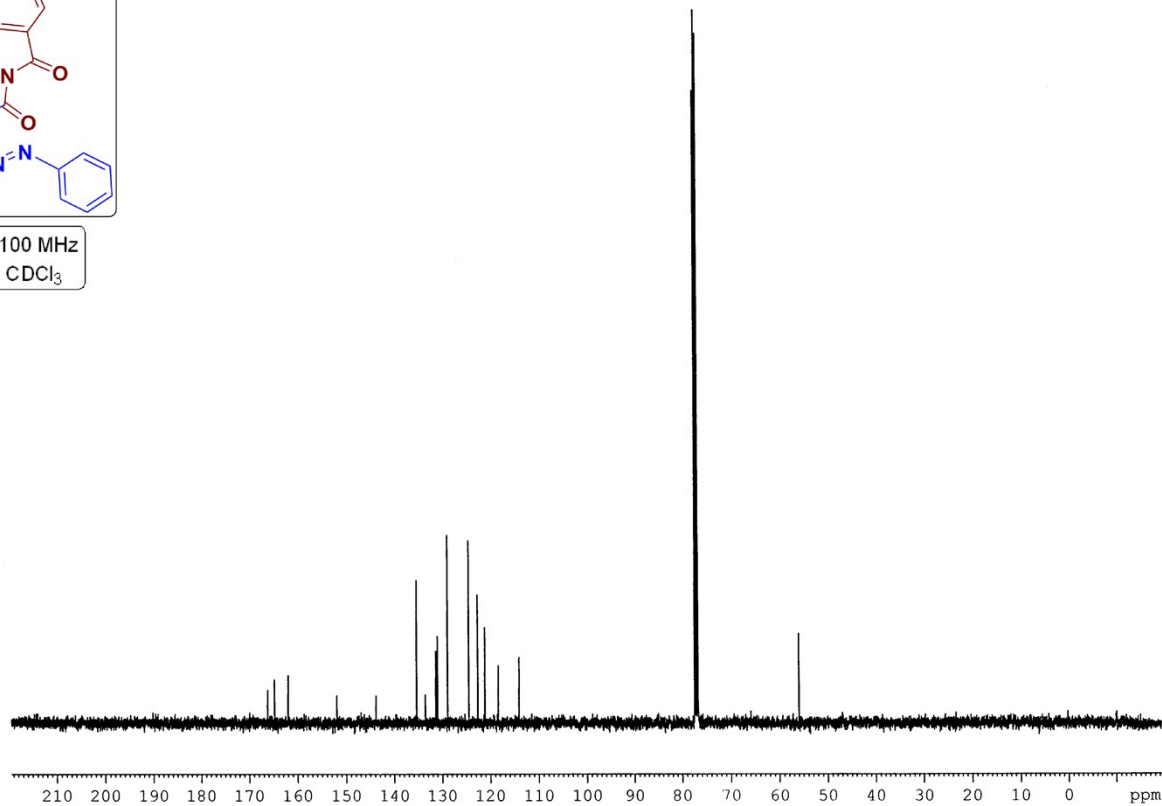

Current Data Parameters  
NAME Dr. A HAJRA-2025-13C  
EXPNO 268  
PROCNO 1

F2 - Acquisition Parameters  
Date 20250802  
Time 11.10  
INSTRUM spect  
PROBHD 5 mm PABBO BB/  
FULPROG zgpg30  
TD 32768  
SOLVENT CDCl3  
NS 260  
DS 2  
SWH 24038.461 Hz  
FIDRES 0.733596 Hz  
AQ 0.6815744 sec  
RG 186.42  
DW 20.800 usec  
DE 6.50 usec  
TE 292.3 K  
D1 2.0000000 sec  
D11 0.03000000 sec  
TDO 1

===== CHANNEL f1 =====  
SFO1 100.6278588 MHz  
NUC1 13C  
P1 8.90 usec  
PLW1 54.00000000 W  
  
===== CHANNEL f2 =====  
SFO2 400.1516006 MHz  
NUC2 1H  
CPDPRG2 waltz16  
PCPD2 90.00 usec  
PLW2 12.00000000 W  
PLW12 0.32231000 W  
PLW13 0.16212000 W

F2 - Processing parameters  
SI 16384  
SF 100.6177873 MHz  
WDW EM  
SSB 0  
LB 1.00 Hz  
GB 0  
PC 1.40

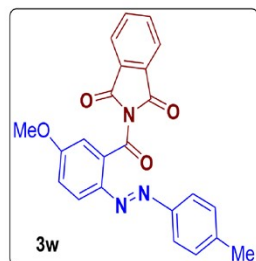

<sup>1</sup>H NMR: 400 MHz  
Solvent: CDCl<sub>3</sub>

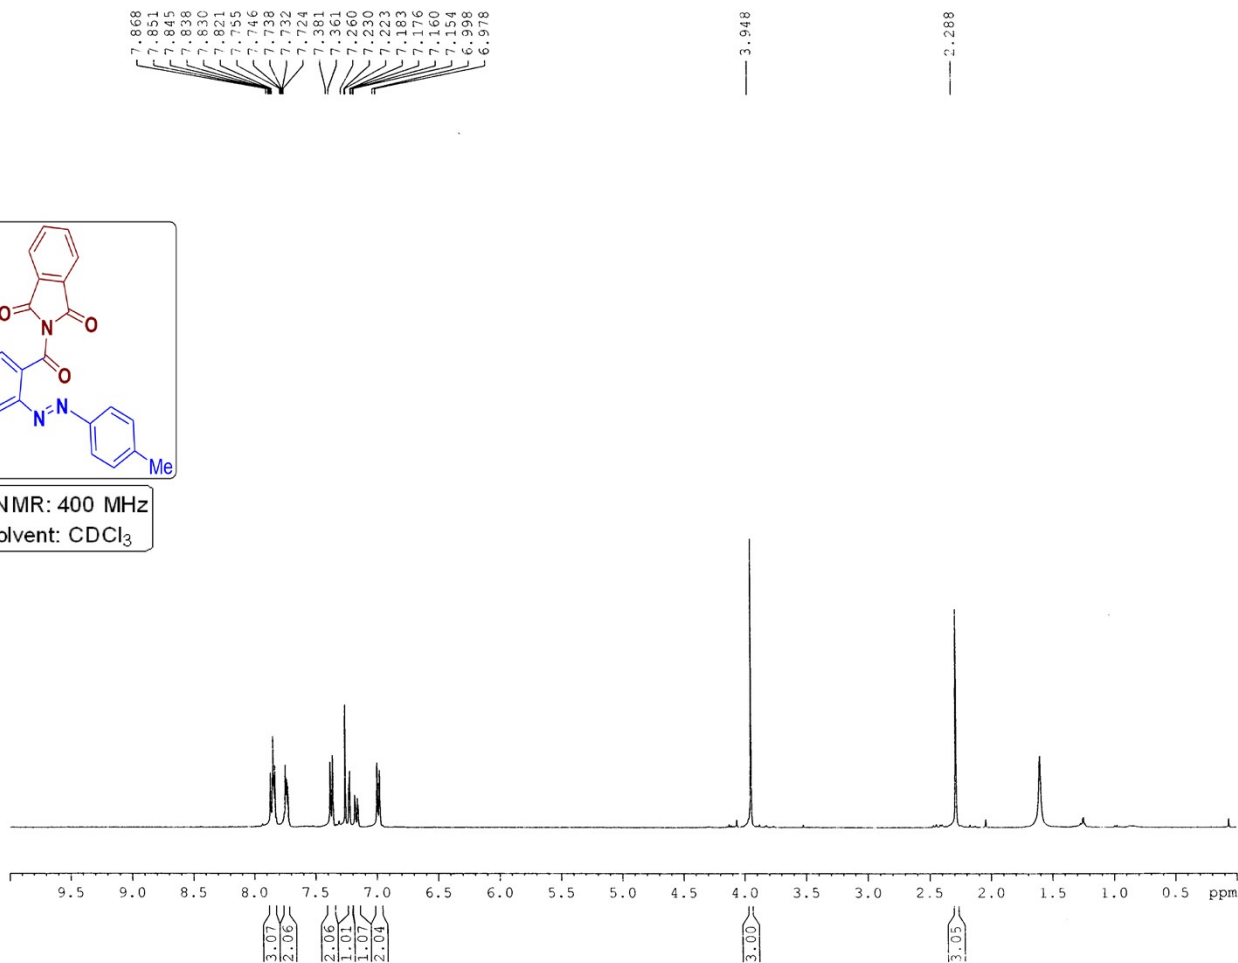

Current Data Parameters  
NAME Dr. A HAJRA 2025 1H  
EXPNO 139  
PROCNO 1

F2 - Acquisition Parameters  
Date\_ 20250225  
Time 11.14  
INSTRUM spect  
PROBHD 5 mm PABBO BB/  
PULPROG zg30  
TD 32768  
SOLVENT CDCl3  
NS 8  
DS 2  
SWH 8223.685 Hz  
FIDRES 0.250967 Hz  
AQ 1.9922944 sec  
RG 186.42  
DW 60.800 usec  
DE 6.50 usec  
TE 295.0 K  
D1 1.00000000 sec  
TDO 1

==== CHANNEL f1 =====  
SFO1 400.1524711 MHz  
NUC1 1H  
P1 14.75 usec  
PLW1 12.00000000 W

F2 - Processing parameters  
SI 16384  
SF 400.1500097 MHz  
WDW EM  
SSB 0  
LB 0.30 Hz  
GB 0  
PC 1.00

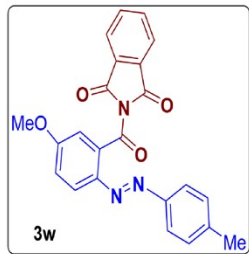

<sup>13</sup>C NMR : 100 MHz  
Solvent: CDCl<sub>3</sub>

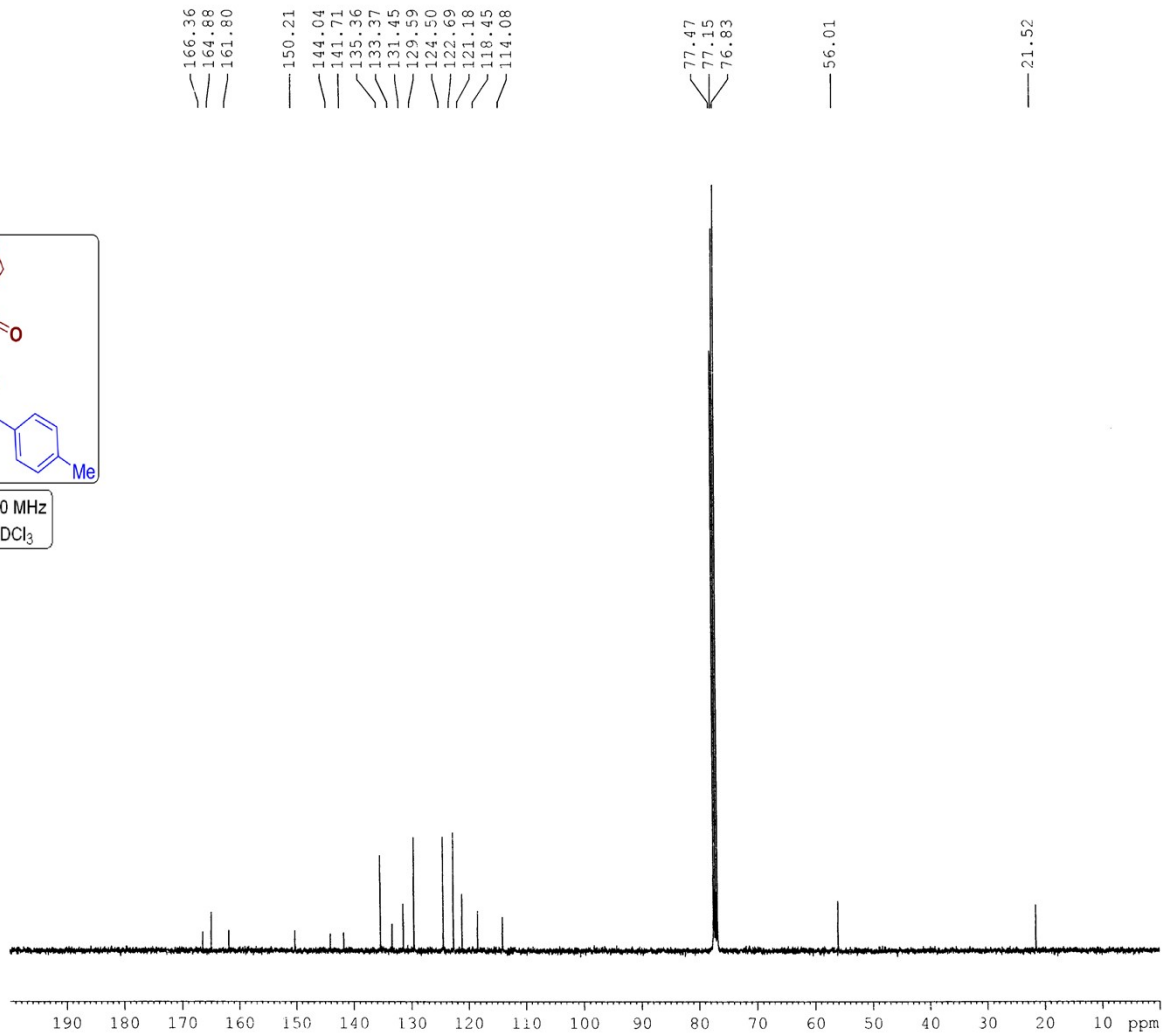

Current Data Parameters  
NAME Dr. A HAJRA-2025-13C  
EXPNO 110  
PROCNO 1

F2 - Acquisition Parameters  
Date\_ 20250725  
Time 12.31  
INSTRUM spect  
PROBHD 5 mm PABRO BB/  
PULPROG zgpg30  
TD 32768  
SOLVENT CDCl3  
NS 1405  
DS 2  
SWH 24038.461 Hz  
FIDRES 0.733596 Hz  
AQ 0.6815744 sec  
RG 186.42  
DW 20.800 usec  
DE 6.50 usec  
TE 294.8 K  
D1 2.00000000 sec  
D11 0.03000000 sec  
TDO 1

===== CHANNEL f1 =====  
SFO1 100.6278582 MHz  
NUC1 13C  
P1 6.90 usec  
PLW1 54.00000000 W

===== CHANNEL f2 =====  
SFO2 400.1516006 MHz  
NUC2 1H  
CPDPRG12 waltz16  
PCPD2 90.00 usec  
PLW2 12.00000000 W  
PLW12 0.32210000 W  
PLW13 0.16212000 W

F2 - Processing parameters  
SI 16384  
SF 100.6177658 MHz  
WDW EM  
SSB 0  
LB 1.00 Hz  
GB 0  
PC 1.40

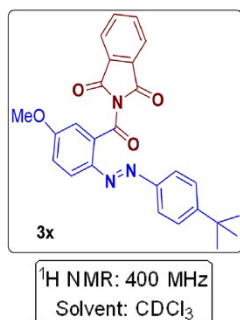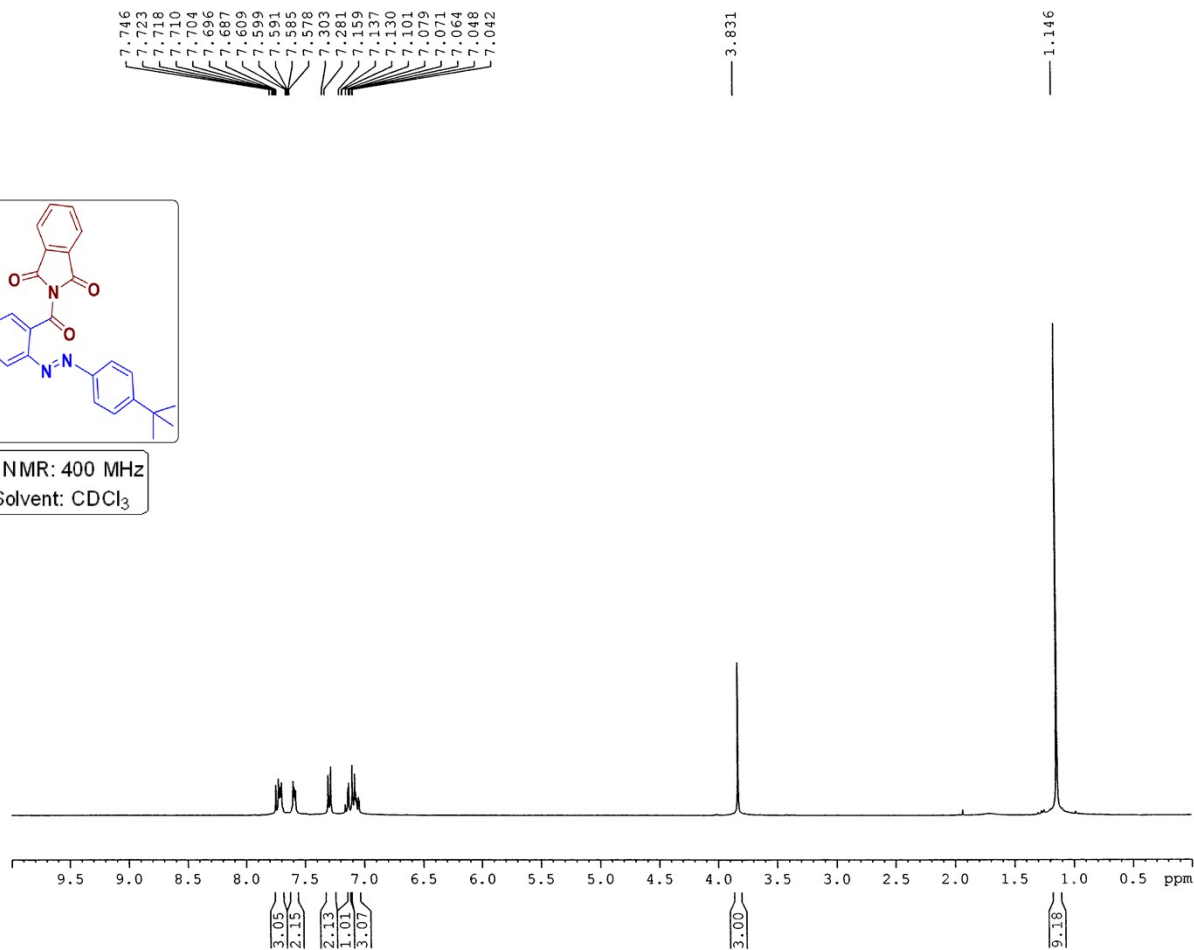

Current Data Parameters  
NAME Dr. A HAJRA 2025 1H  
EXPNO 393  
PROCNO 1

F2 - Acquisition Parameters  
Date\_ 20250714  
Time\_ 10.45  
INSTRUM spect  
PROBHD 5 mm PABBO BB/  
PULPROG zg30  
TD 32768  
SOLVENT CDCl3  
NS 8  
DS 2  
SWH 8223.685 Hz  
FIDRES 0.250967 Hz  
AQ 1.9922944 sec  
RG 47.25  
DW 60.800 usec  
DE 6.50 usec  
TE 296.4 K  
D1 1.0000000 sec  
TD0 1

===== CHANNEL f1 =====  
SF01 400.1524711 MHz  
NUC1 1H  
P1 14.75 usec  
PLW1 12.0000000 W

F2 - Processing parameters  
SI 16384  
SF 400.1500496 MHz  
WDW EM  
SSB 0  
LB 0.30 Hz  
GB 0  
PC 1.00

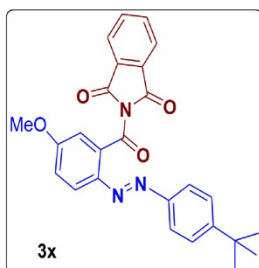

<sup>13</sup>C NMR : 100 MHz  
Solvent: CDCl<sub>3</sub>

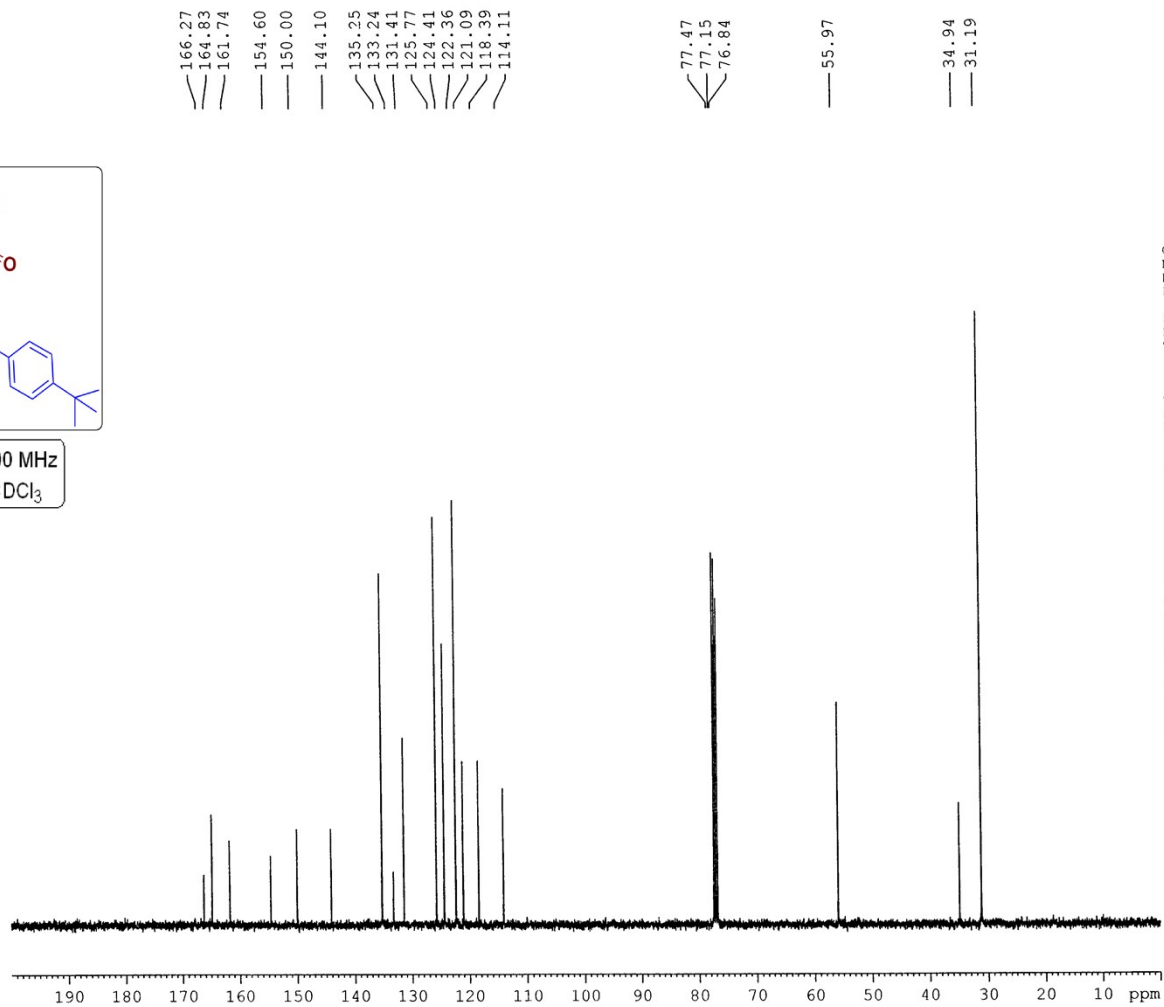

```

Current Data Parameters
NAME      Dr. A HAJRA-2025-13C
EXPNO    223
PROCNO    1

F2 - Acquisition Parameters
Date_     20250714
Time      10.58
INSTRUM   spect
PROBHD    5 mm PABBO BB/
PULPROG   zgpg30
TD        32768
SOLVENT   CDCl3
NS        110
DS        2
SWH       24038.461 Hz
FIDRES    0.733596 Hz
AQ        0.6815744 sec
RG        186.42
DW        20.800 usec
DE        6.50 usec
TE        296.6 K
D1        2.00000000 sec
D11       0.03000000 sec
TD0       1

----- CHANNEL f1 -----
SFO1      100.6278588 MHz
NUC1      13C
P1        8.90 usec
PLW1      54.00000000 W

----- CHANNEL f2 -----
SFO2      400.1516006 MHz
NUC2      1H
CPDPRG2   waltz16
PCPD2     90.00 usec
PLW2      12.00000000 W
PLW12     0.32231000 W
PLW13     0.16212000 W

F2 - Processing parameters
SI        16384
SF        100.6177916 MHz
WDW       EM
SSB       0
LB        1.00 Hz
GB        0
PC        1.40

```

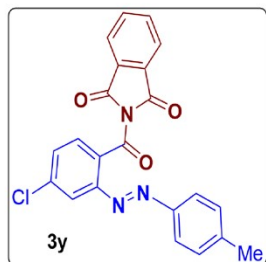

<sup>1</sup>H NMR: 400 MHz  
Solvent: CDCl<sub>3</sub>

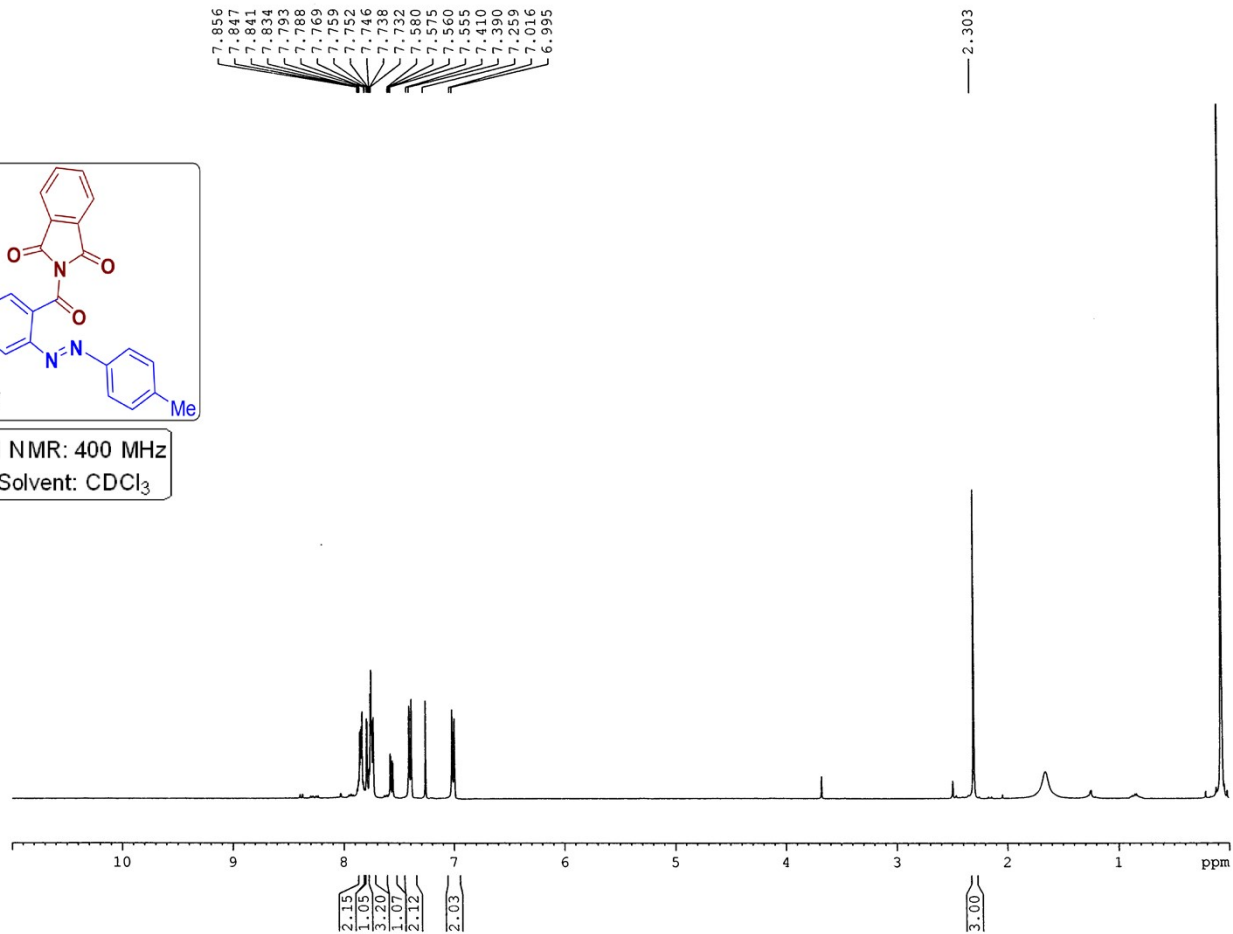

Current Data Parameters  
NAME Dr. A HAJRA 2025 1H  
EXPNO 406  
PROCNO 1

F2 - Acquisition Parameters  
Date\_ 20250718  
Time\_ 12.23  
INSTRUM spect  
PROBHD 5 mm PABBO BB/  
PULPROG zg30  
TD 32768  
SOLVENT CDCl3  
NS 8  
DS 2  
SWH 8223.685 Hz  
FIDRES 0.250967 Hz  
AQ 1.9922944 sec  
RG 135.7  
DW 60.800 usec  
DE 6.50 usec  
TE 292.2 K  
D1 1.00000000 sec  
TD0 1

===== CHANNEL f1 =====  
SFO1 400.1524711 MHz  
NUC1 1H  
P1 14.75 usec  
PLW1 12.00000000 W

F2 - Processing parameters  
SI 16384  
SF 400.1500100 MHz  
WDW EM  
SSB 0  
LB 0.30 Hz  
GB 0  
PC 1.00

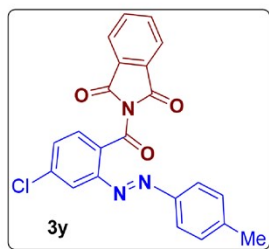

<sup>13</sup>C NMR : 100 MHz  
Solvent: CDCl<sub>3</sub>

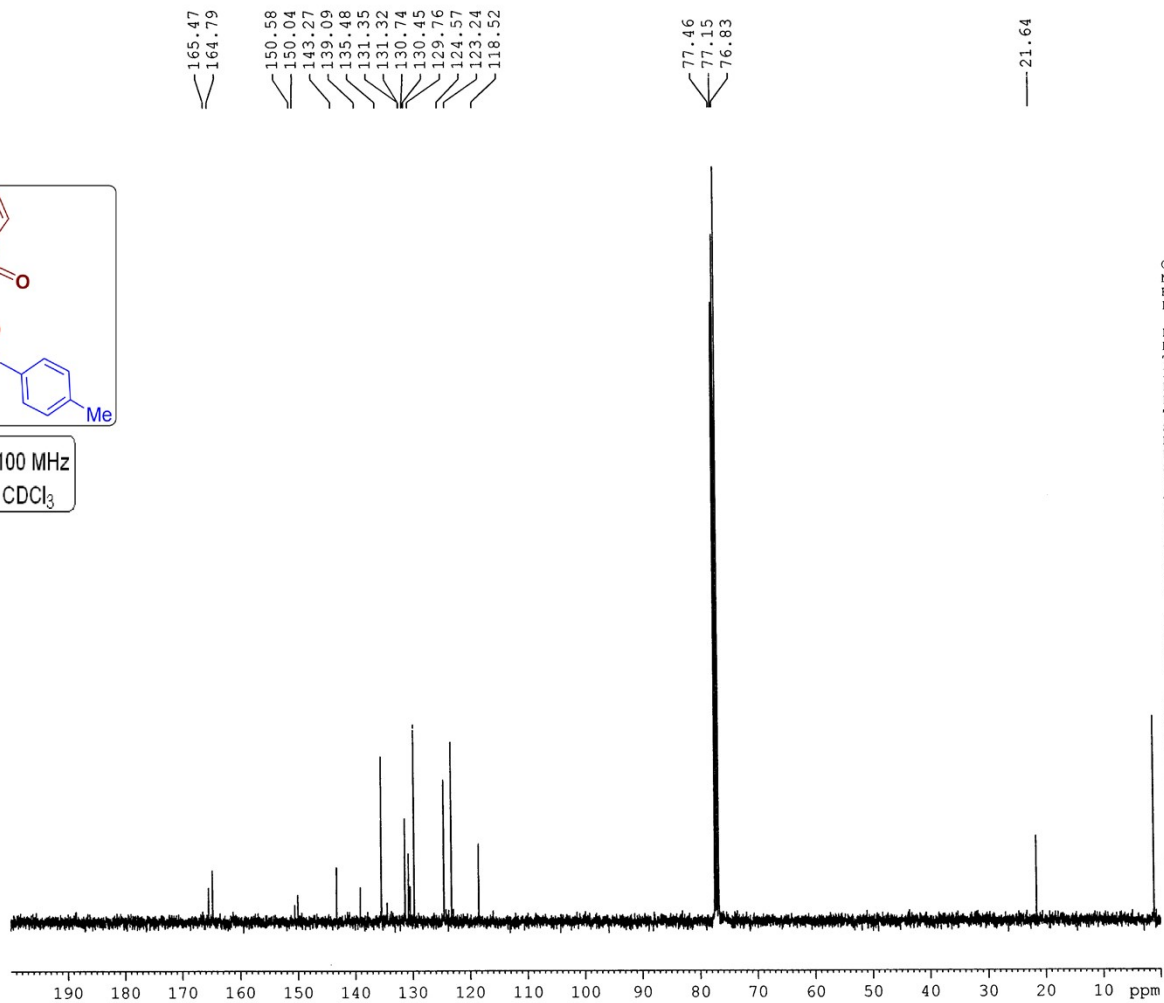

Current Data Parameters  
NAME Dr. A HAJRA-2025-13C  
EXPNO 235  
PROCNO 1

F2 - Acquisition Parameters  
Date\_ 20250718  
Time 12.46  
INSTRUM spect  
PROBHD 5 mm FAPBO BB/  
PULPROG zgpg30  
TD 32768  
SOLVENT CDCl3  
NS 360  
DS 2  
SWH 24038.461 Hz  
FIDRES 0.733596 Hz  
AQ 0.6815744 sec  
RG 186.42  
DW 20.800 usec  
DE 6.50 usec  
TE 292.6 K  
D1 2.00000000 sec  
D11 0.02000000 sec  
TDO 1

----- CHANNEL f1 -----  
SFO1 100.6278588 MHz  
NUC1 13C  
P1 8.90 usec  
PLW1 54.00000000 W

----- CHANNEL f2 -----  
SFO2 400.1516006 MHz  
NUC2 1H  
CPDPRG[2] waltz16  
PCPD2 90.00 usec  
PLW2 12.00000000 W  
PLW12 0.32231000 W  
PLW13 0.16212000 W

F2 - Processing parameters  
SI 16384  
SF 100.6177874 MHz  
WDW EM  
SSB 0  
LB 1.00 Hz  
GB 0  
PC 1.40

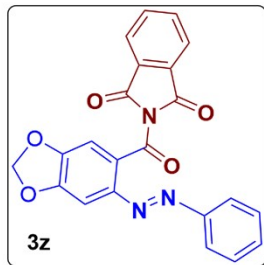

<sup>1</sup>H NMR: 400 MHz  
Solvent: CDCl<sub>3</sub>

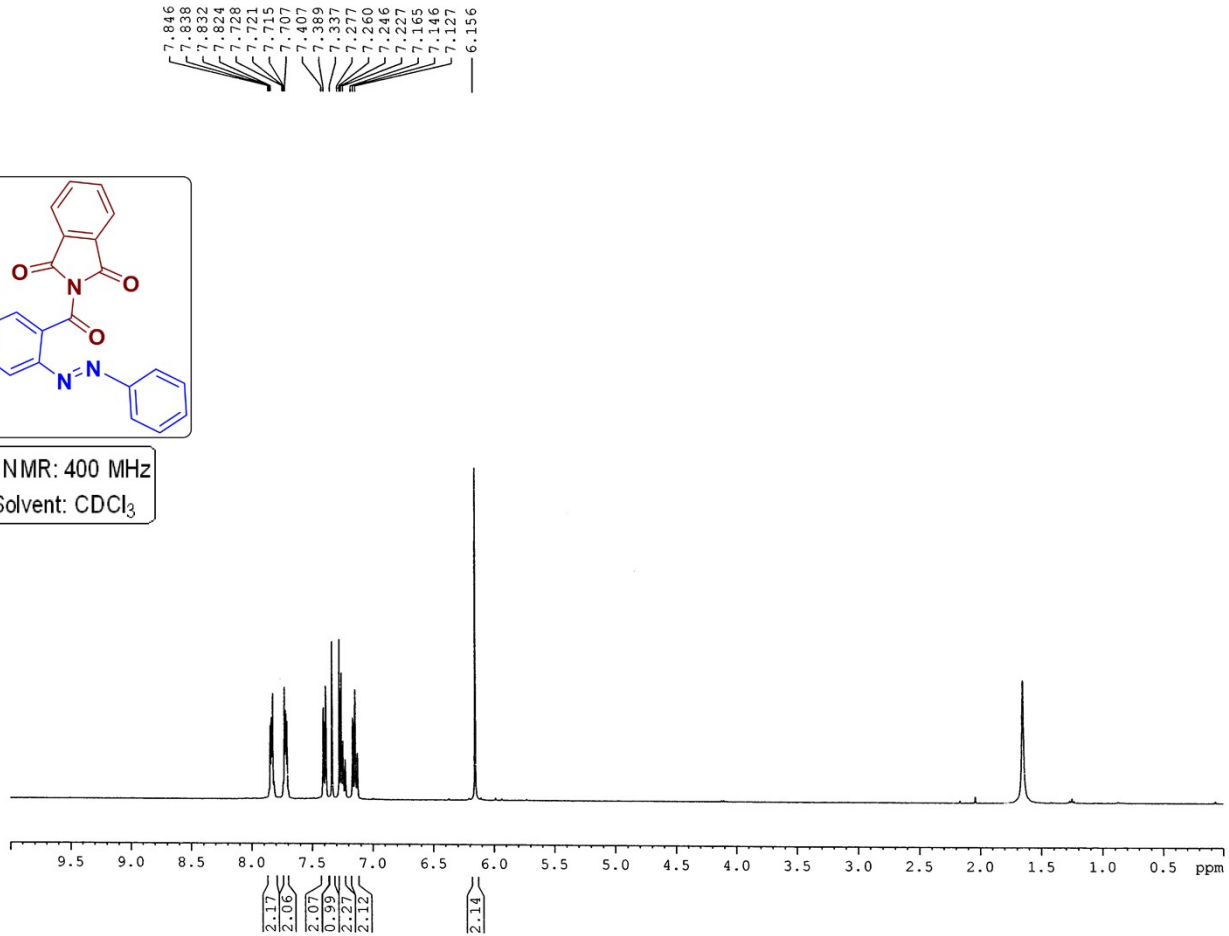

Current Data Parameters  
NAME Dr. A HAJRA 2025 1H  
EXPNO 418  
PROCNO 1

F2 - Acquisition Parameters  
Date\_ 20250720  
Time\_ 12.17  
INSTRUM spect  
PROBHD 5 mm PABBO BB/  
PULPROG zg30  
TD 32768  
SOLVENT CDCl3  
NS 8  
DS 2  
SWH 8223.685 Hz  
FIDRES 0.250967 Hz  
AQ 1.9922944 sec  
RG 186.42  
DW 60.800 usec  
DE 6.50 usec  
TE 293.1 K  
D1 1.00000000 sec  
TD0 1

===== CHANNEL f1 =====  
SFO1 400.1524711 MHz  
NUC1 1H  
P1 14.75 usec  
PLW1 12.00000000 W

F2 - Processing parameters  
SI 16384  
SF 400.1500097 MHz  
WDW EM  
SSB 0  
LB 0.30 Hz  
GB 0  
PC 1.00

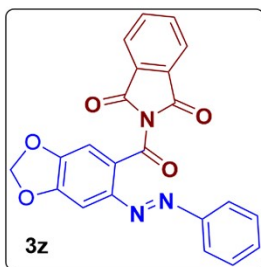

<sup>13</sup>C NMR : 100 MHz  
Solvent: CDCl<sub>3</sub>

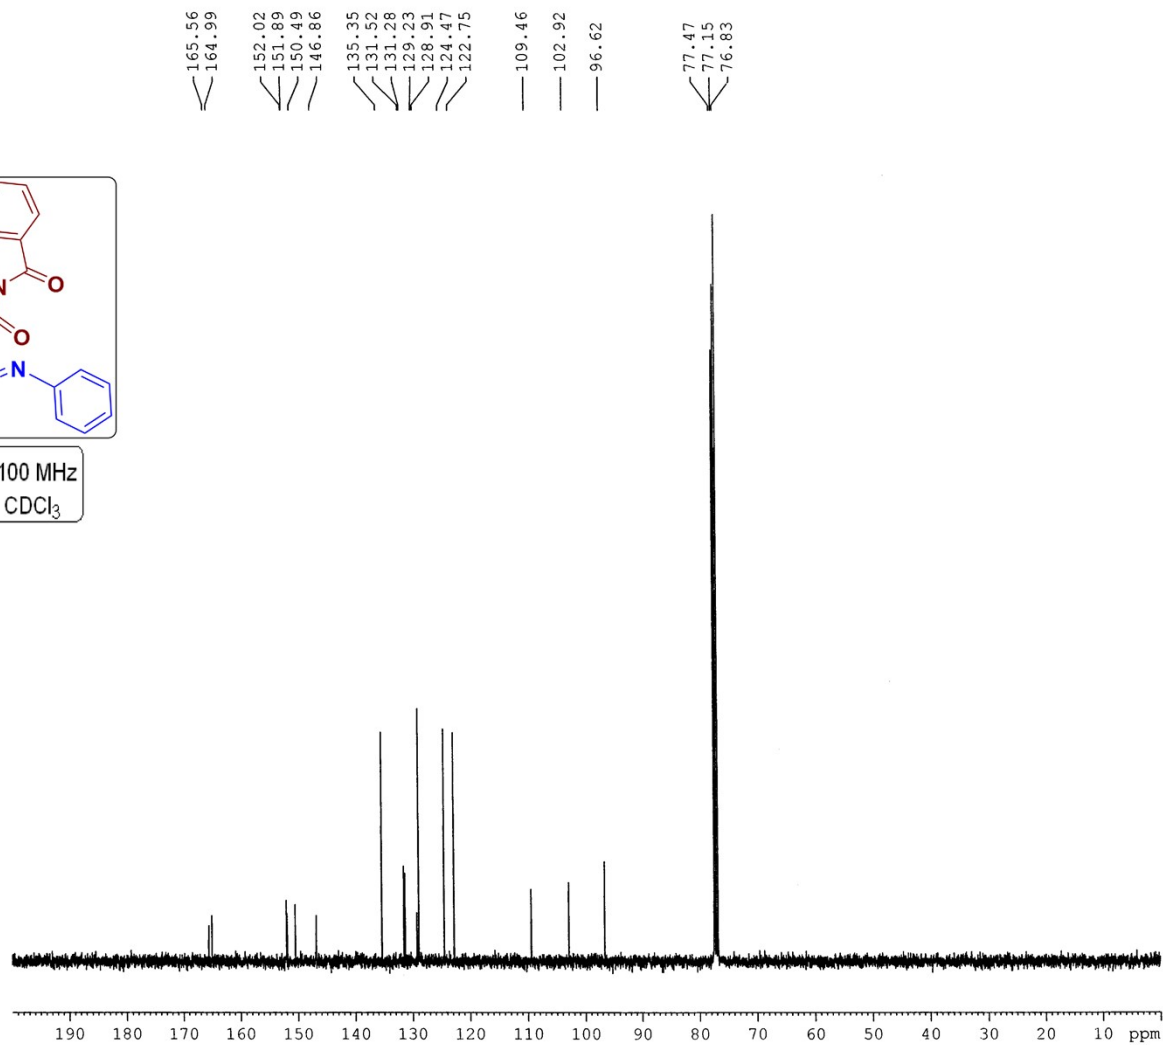

Current Data Parameters  
NAME Dr. A HARA-2025-13C  
EXNO 244  
PROCNO 1

F2 - Acquisition Parameters  
Date\_ 20250720  
Time 12.36  
INSTRUM spect  
PROBHD 5 mm PABBO BB/  
PULPROG zgpg30  
TD 32768  
SOLVENT CDCl3  
NS 310  
DS 2  
SWH 24038.461 Hz  
FIDRES 0.733596 Hz  
AQ 0.6815744 sec  
RG 186.42  
DW 20.800 usec  
DE 6.50 usec  
TE 293.3 K  
D1 2.00000000 sec  
D11 0.03000000 sec  
TD0 1

===== CHANNEL f1 =====  
SFO1 100.6278588 MHz  
NUC1 13C  
F1 8.90 usec  
PLW1 54.00000000 W

===== CHANNEL f2 =====  
SFO2 400.1516006 MHz  
NUC2 1H  
CPDPRG[2] waltz16  
PCPD2 90.00 usec  
PLW2 12.00000000 W  
PLW12 0.32231000 W  
PLW13 0.16212000 W

F2 - Processing parameters  
SI 16384  
SF 100.6177871 MHz  
WDW EM  
SSB 0  
LB 1.00 Hz  
GB 0  
PC 1.40

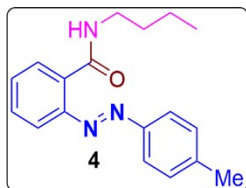

<sup>1</sup>H NMR: 400 MHz  
Solvent: CDCl<sub>3</sub>

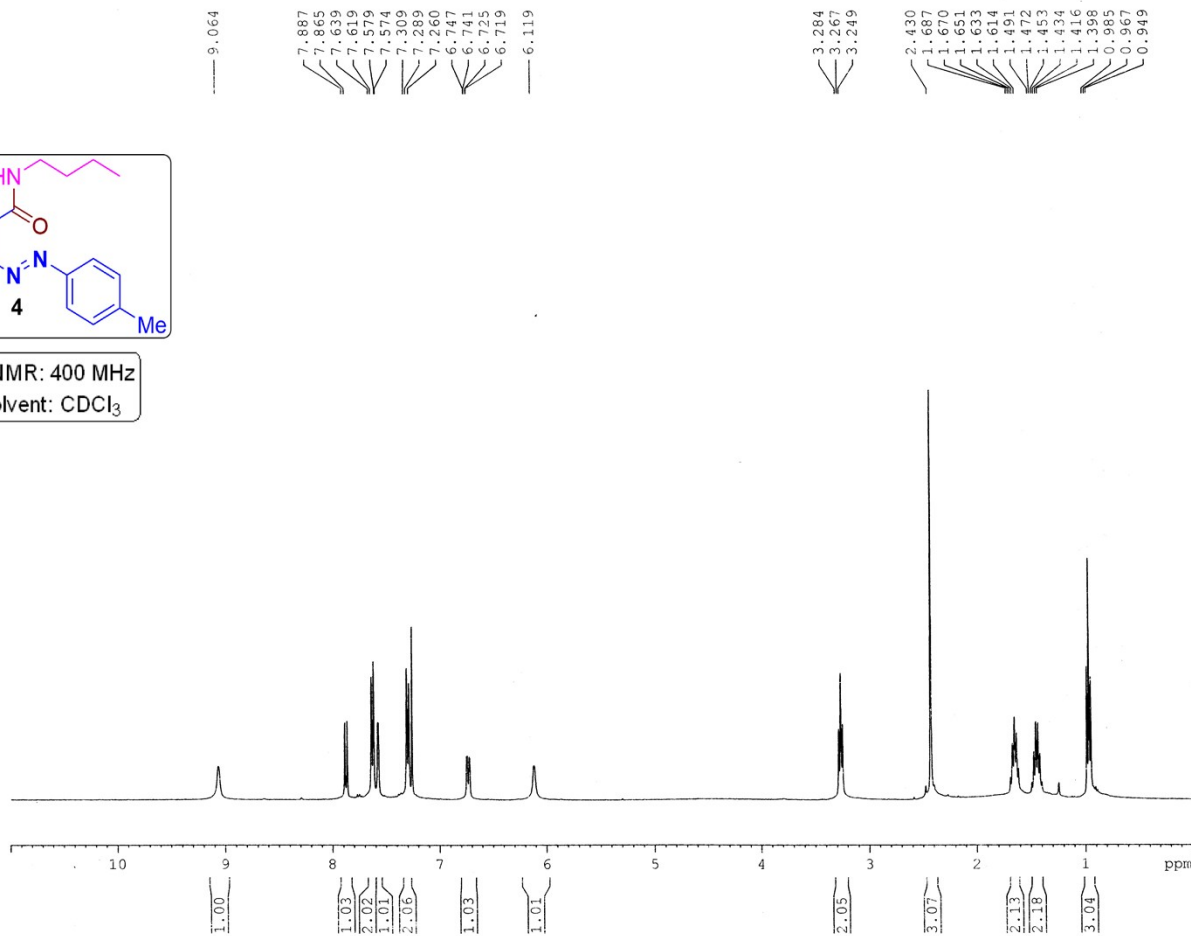

Current Data Parameters  
NAME Dr. A HAJRA 2025 1H  
EXPNO 773  
PROCNO 1

F2 - Acquisition Parameters  
Date\_ 20251230  
Time 17.32  
INSTRUM spect  
PROBHD 5 mm PABBO BB/  
PULPROG zg30  
TD 32768  
SOLVENT CDCl<sub>3</sub>  
NS 8  
DS 2  
SWH 8223.685 Hz  
FIDRES 0.250967 Hz  
AQ 1.9922944 sec  
RG 186.42  
DW 60.800 usec  
DE 6.50 usec  
TE 287.3 K  
D1 1.00000000 sec  
TDO 1

===== CHANNEL f1 =====  
SF01 400.1524711 MHz  
NUC1 1H  
P1 14.75 usec  
PLW1 12.00000000 W

F2 - Processing parameters  
SI 16384  
SF 400.1500097 MHz  
WDW EM  
SSB 0  
LB 0.30 Hz  
GB 0  
PC 1.00

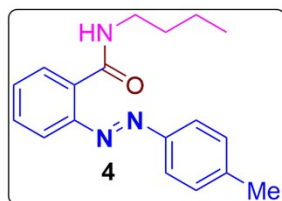

<sup>13</sup>C NMR : 100 MHz  
Solvent: CDCl<sub>3</sub>

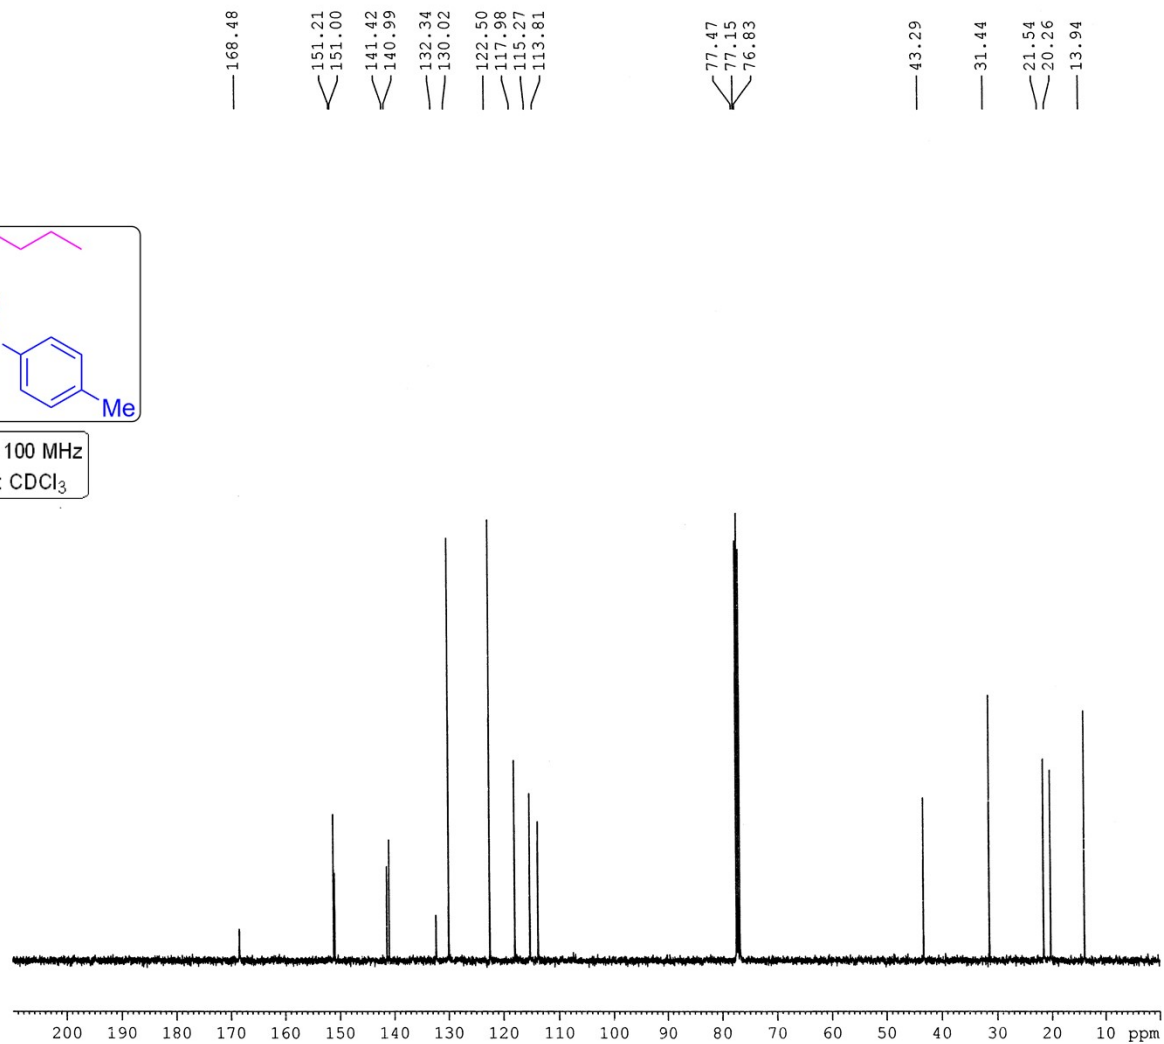

Current Data Parameters  
NAME Dr. A HAJRA-2025-13C  
EXPNO 300  
PROCNO 1

F2 - Acquisition Parameters  
Date\_ 20250826  
Time 19.54  
INSTRUM spect  
PROBHD 5 mm PABBO BB/  
PULPROG zgpg30  
TD 32768  
SOLVENT CDCl3  
NS 200  
DS 2  
SWH 24038.461 Hz  
FIDRES 0.733596 Hz  
AQ 0.6815744 sec  
RG 186.42  
DW 20.800 usec  
DE 6.50 usec  
TE 291.3 K  
D1 2.00000000 sec  
D11 0.03000000 sec  
TD0 1

----- CHANNEL f1 -----  
SFO1 100.6278588 MHz  
NUC1 13C  
P1 8.90 usec  
PLW1 54.00000000 W

----- CHANNEL f2 -----  
SFO2 400.1516006 MHz  
NUC2 1H  
CPDPRG[2] waltz16  
PCPD2 90.00 usec  
PLW2 12.00000000 W  
PLW12 0.32231000 W  
PLW13 0.16212000 W

F2 - Processing parameters  
SI 16384  
SF 100.6177931 MHz  
WDW EM  
SSB 0  
LB 1.00 Hz  
GB 0  
PC 1.40

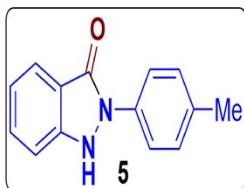

<sup>1</sup>H NMR: 400 MHz  
Solvent: CDCl<sub>3</sub>

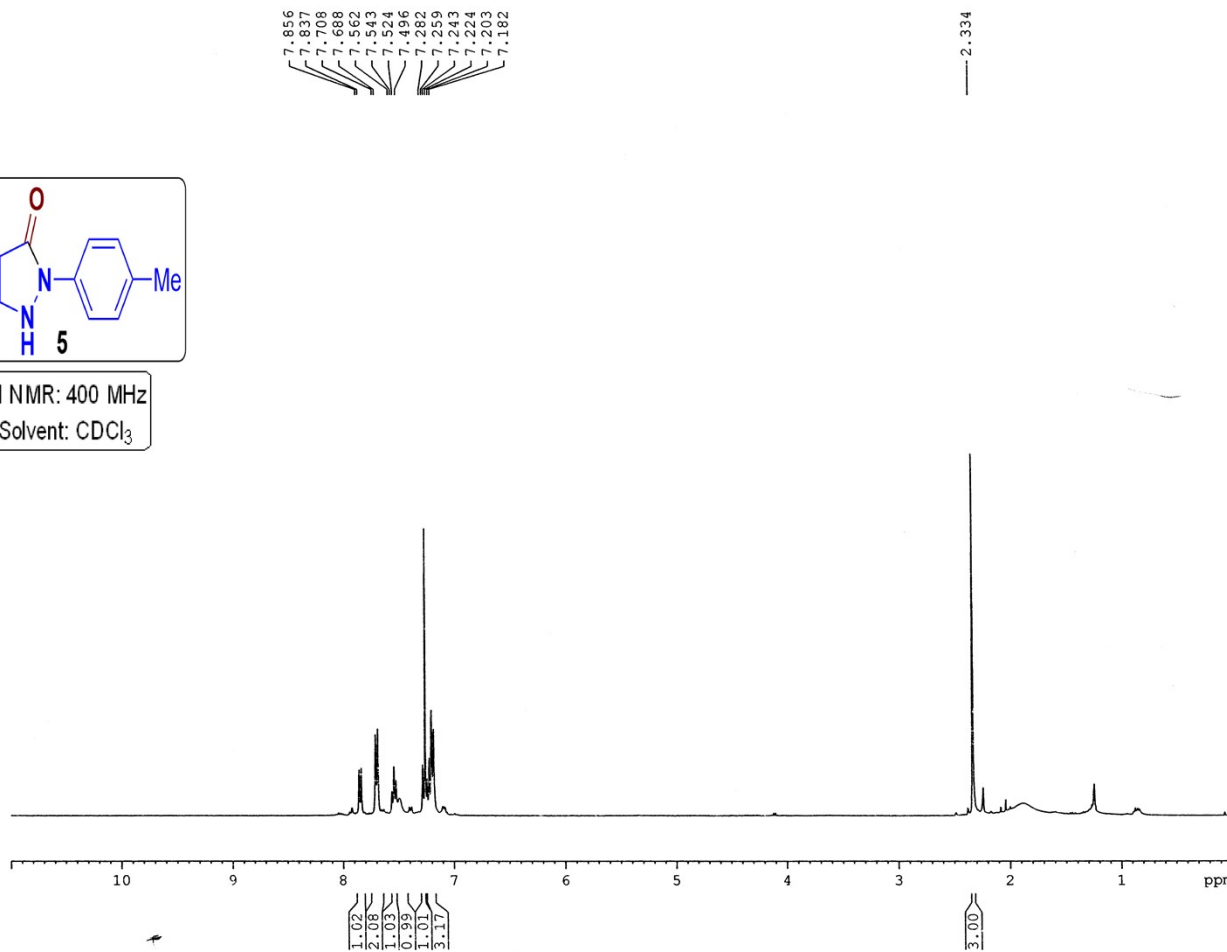

Current Data Parameters  
NAME Dr. A HAJRA 2025 1H  
EXPNO 645  
PROCNO 1

F2 - Acquisition Parameters  
Date\_ 20251102  
Time 11.12  
INSTRUM spect  
PROBHD 5 mm PABBO BB/  
PULPROG zg30  
TD 32768  
SOLVENT CDCl3  
NS 8  
DS 2  
SWH 8223.685 Hz  
FIDRES 0.250967 Hz  
AQ 1.9922944 sec  
RG 186.42  
DW 60.800 usec  
DE 6.50 usec  
TE 291.3 K  
D1 1.00000000 sec  
TD0 1

===== CHANNEL f1 =====  
SFO1 400.1524711 MHz  
NUC1 1H  
P1 14.75 usec  
PLW1 12.00000000 W

F2 - Processing parameters  
SI 16384  
SF 400.1500098 MHz  
WDW EM  
SSB 0  
LB 0.30 Hz  
GB 0  
PC 1.00

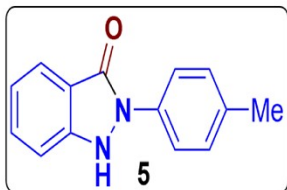

<sup>13</sup>C NMR : 100 MHz  
Solvent: CDCl<sub>3</sub>

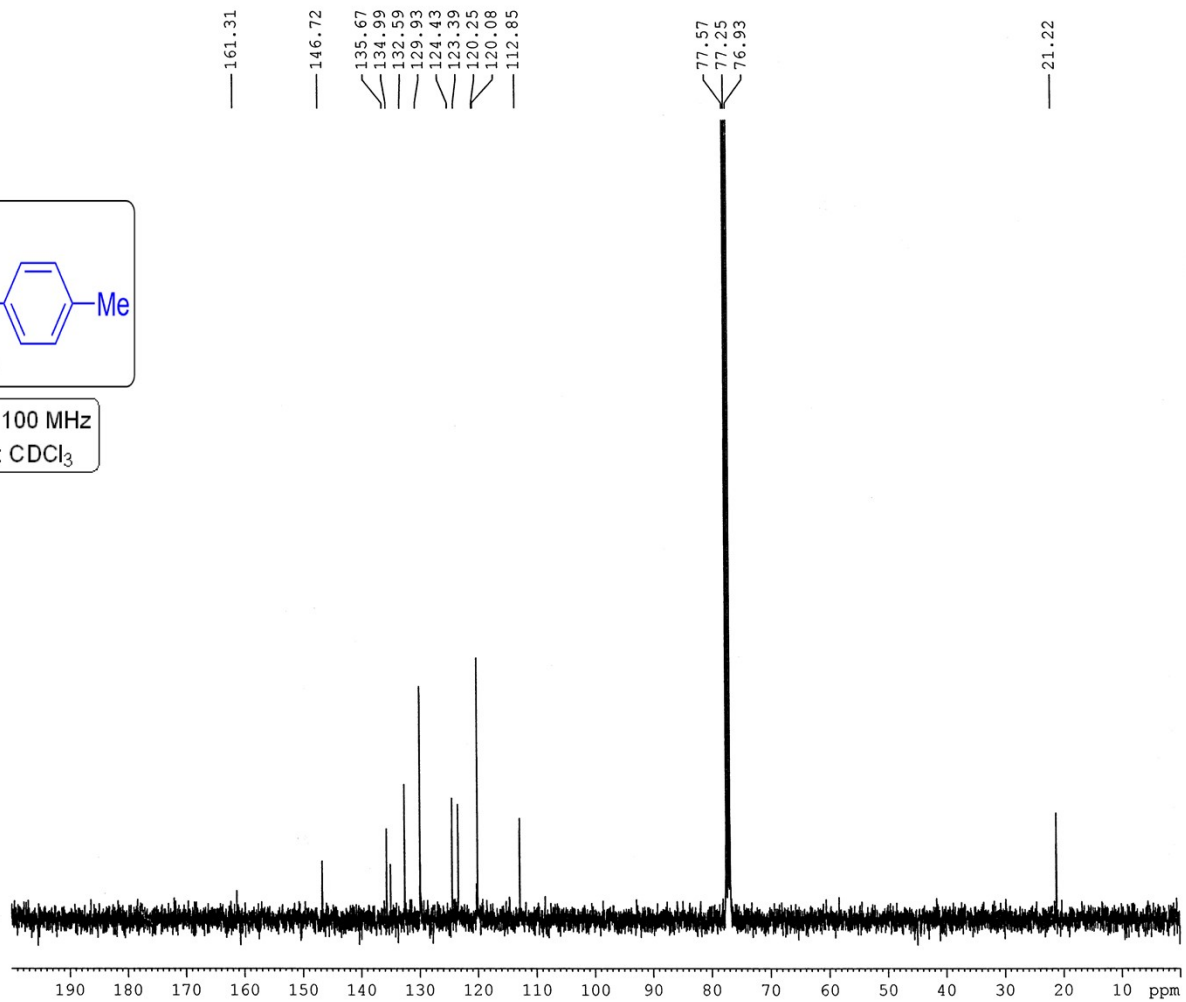

Current Data Parameters  
NAME Dr. A HAJRA-2025-13C  
EXPNO 374  
PROCNO 1

F2 - Acquisition Parameters  
Date\_ 20251102  
Time 11.54  
INSTRUM spect  
PROBHD 5 mm PABBO BB/  
PULPROG zgpg30  
TD 32768  
SOLVENT CDCl3  
NS 825  
DS 2  
SWH 24038.461 Hz  
FIDRES 0.733596 Hz  
AQ 0.6815744 sec  
RG 186.42  
DW 20.800 usec  
DE 6.50 usec  
TE 291.4 K  
D1 2.0000000 sec  
D11 0.0300000 sec  
TDO 1

----- CHANNEL f1 -----  
SFO1 100.6278588 MHz  
NUC1 13C  
P1 8.90 usec  
PLW1 54.00000000 W

----- CHANNEL f2 -----  
SFO2 400.1516006 MHz  
NUC2 1H  
CFDPRG[2] waltz16  
PCPD2 90.00 usec  
PLW2 12.00000000 W  
PLW12 0.32231000 W  
PLW13 0.16212000 W

F2 - Processing parameters  
SI 16384  
SF 100.6177773 MHz  
WDW EM  
SSB 0  
LB 1.00 Hz  
GB 0  
FC 1.40

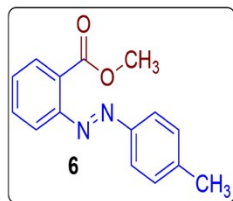

<sup>1</sup>H NMR: 400 MHz  
Solvent: CDCl<sub>3</sub>

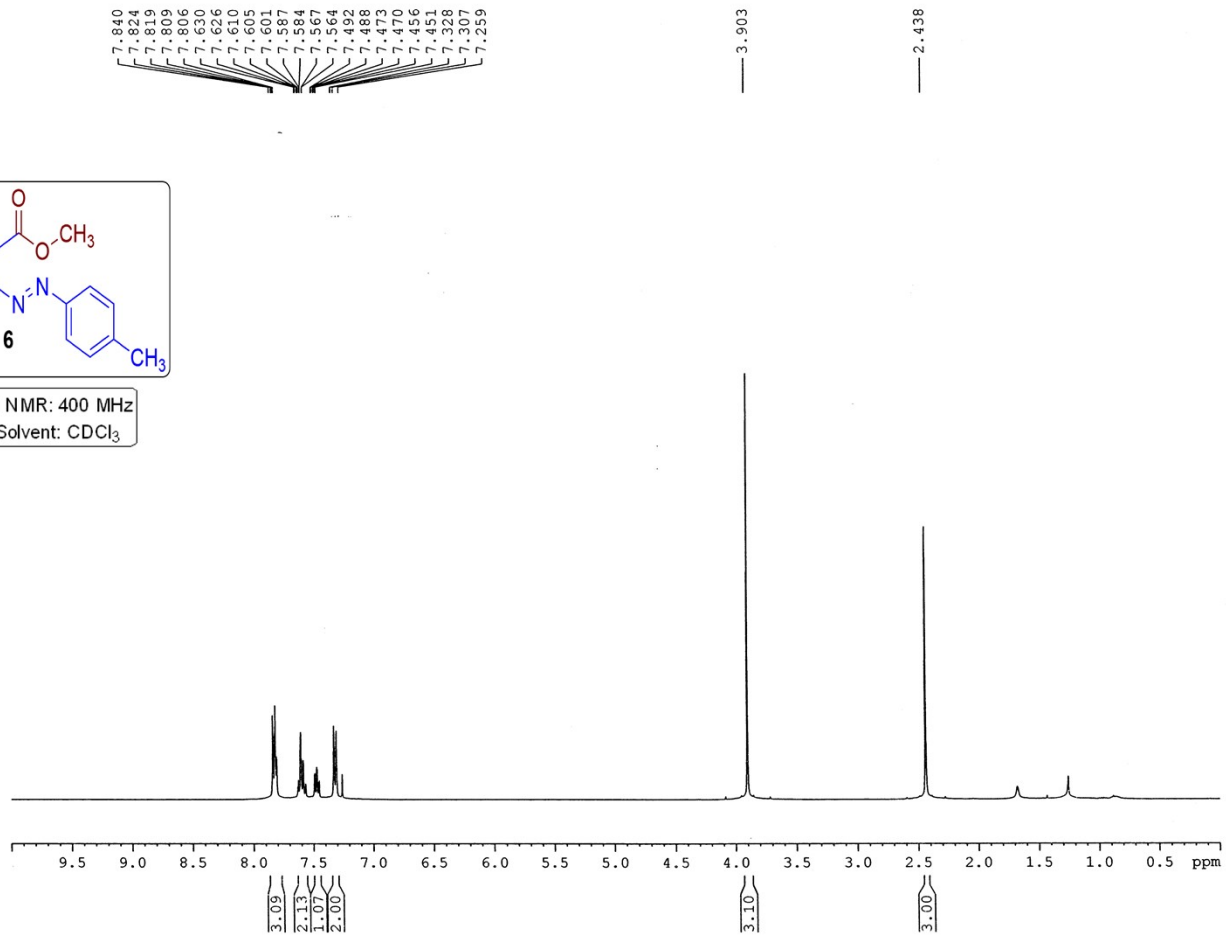

Current Data Parameters  
NAME Dr. A HAJRA 2025 1H  
EXPNO 656  
PROCNO 1

F2 - Acquisition Parameters  
Date\_ 20251106  
Time 10.16  
INSTRUM spect  
PROBHD 5 mm PABBO BB/  
PULPROG zg30  
TD 32768  
SOLVENT CDCl3  
NS 8  
DS 2  
SWH 8223.685 Hz  
FIDRES 0.250967 Hz  
AQ 1.9922944 sec  
RG 87.65  
DW 60.800 usec  
DE 6.50 usec  
TE 291.8 K  
D1 1.00000000 sec  
TDO 1

===== CHANNEL f1 =====  
SF01 400.1524711 MHz  
NUC1 1H  
P1 14.75 usec  
PLW1 12.00000000 W

F2 - Processing parameters  
SI 16384  
SF 400.1500097 MHz  
WDW EM  
SSB 0  
LB 0.30 Hz  
GB 0  
PC 1.00

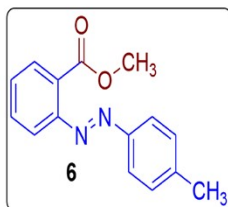

$^{13}\text{C}$  NMR : 100 MHz  
Solvent:  $\text{CDCl}_3$

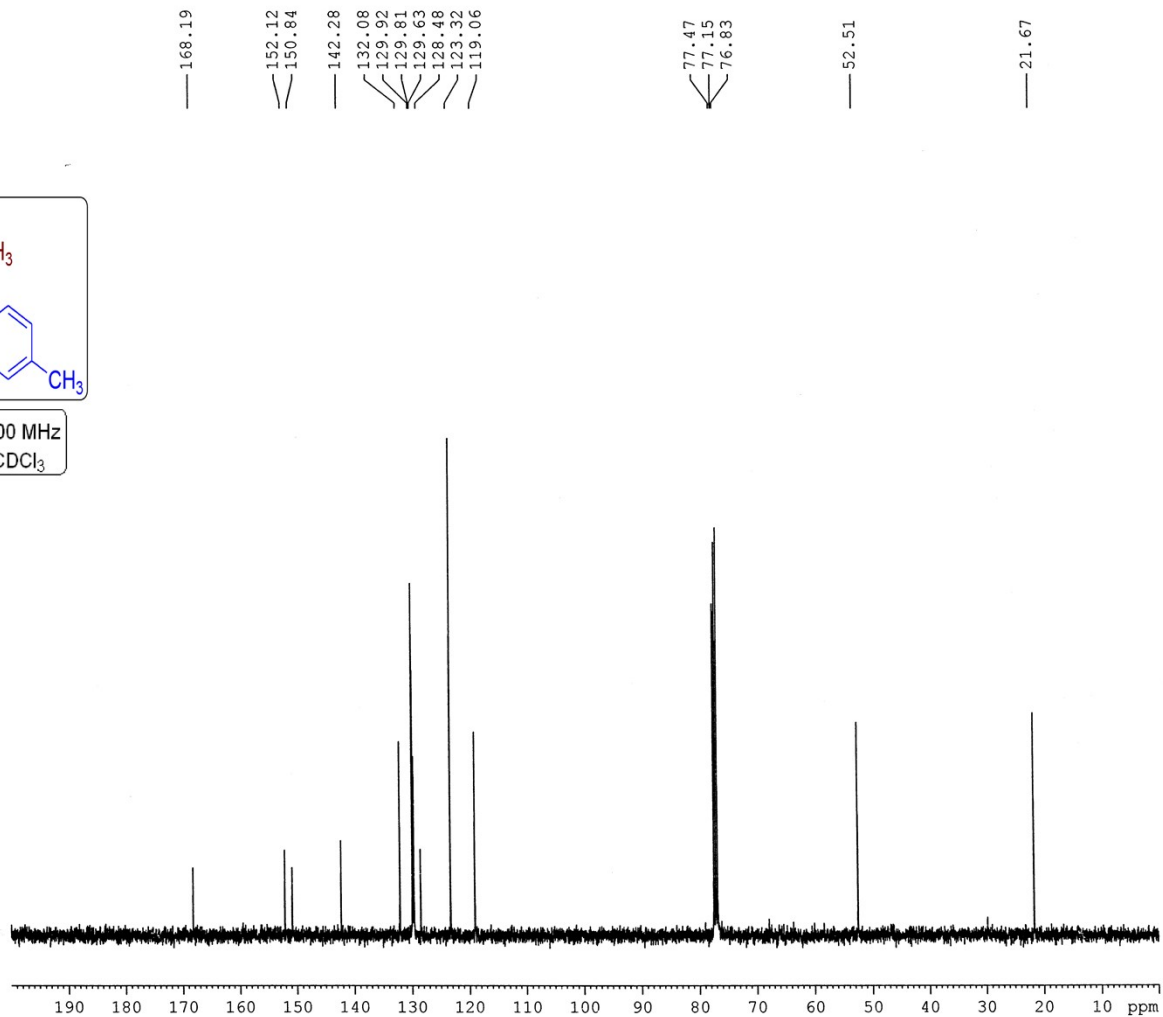

Current Data Parameters  
NAME Dr. A HAJRA-2025-13C  
EXPNO 379  
PROCNO 1

F2 - Acquisition Parameters  
Date\_ 20251106  
Time 10.24  
INSTRUM spect  
PROBHD 5 mm FAPBO BB/  
PULPROG zgpg30  
TD 32768  
SOLVENT  $\text{CDCl}_3$   
NS 90  
DS 2  
SWH 24038.461 Hz  
FIDRES 0.733596 Hz  
AQ 0.6815744 sec  
RG 186.42  
DW 20.800 usec  
DE 6.50 usec  
TE 291.9 K  
D1 2.00000000 sec  
D11 0.03000000 sec  
TD0 1

===== CHANNEL f1 =====  
SFO1 100.6278585 MHz  
NUC1  $^{13}\text{C}$   
P1 8.90 usec  
PLW1 54.00000000 W

===== CHANNEL f2 =====  
SFO2 400.1516006 MHz  
NUC2  $^1\text{H}$   
CPCPRG[2] waltz16  
PCPD2 90.00 usec  
PLW2 12.00000000 W  
PLW12 0.32231000 W  
PLW13 0.16212000 W

F2 - Processing parameters  
SI 16384  
SF 100.6177901 MHz  
WDW EM  
SSB 0  
LB 1.00 Hz  
GB 0  
PC 1.40

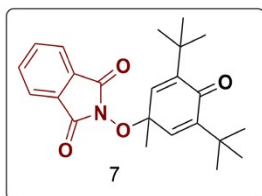

<sup>1</sup>H NMR: 400 MHz  
Solvent: CDCl<sub>3</sub>

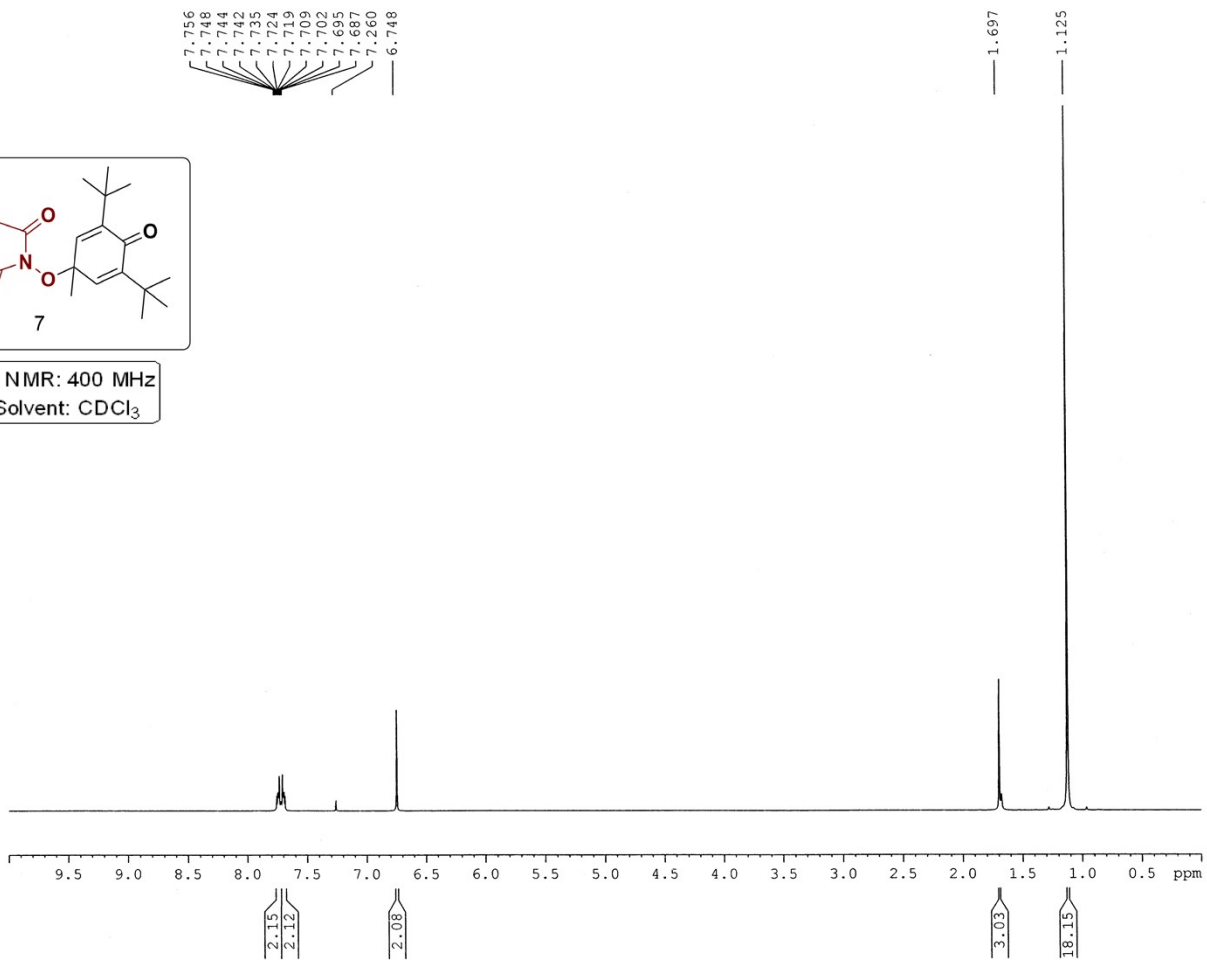

Current Data Parameters  
NAME Dr. A HAJRA 2025 1H  
EXPNO 544  
PROCNO 1

F2 - Acquisition Parameters  
Date\_ 20250910  
Time 10.05  
INSTRUM spect  
PROBHD 5 mm PABBO BB/  
PULPROG zg30  
TD 32768  
SOLVENT CDCl3  
NS 8  
DS 2  
SWH 8223.685 Hz  
FIDRES 0.250967 Hz  
AQ 1.9922944 sec  
RG 62.69  
DW 60.800 usec  
DE 6.50 usec  
TE 293.9 K  
D1 1.0000000 sec  
TD0 1

===== CHANNEL f1 =====  
SFO1 400.1524711 MHz  
NUC1 1H  
P1 14.75 usec  
PLW1 12.00000000 W

F2 - Processing parameters  
SI 16384  
SF 400.1500095 MHz  
WDW EM  
SSB 0  
LB 0.30 Hz  
GB 0  
PC 1.00

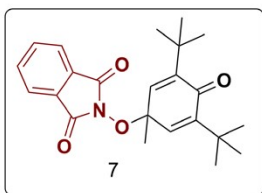

<sup>13</sup>C NMR : 100 MHz  
Solvent: CDCl<sub>3</sub>

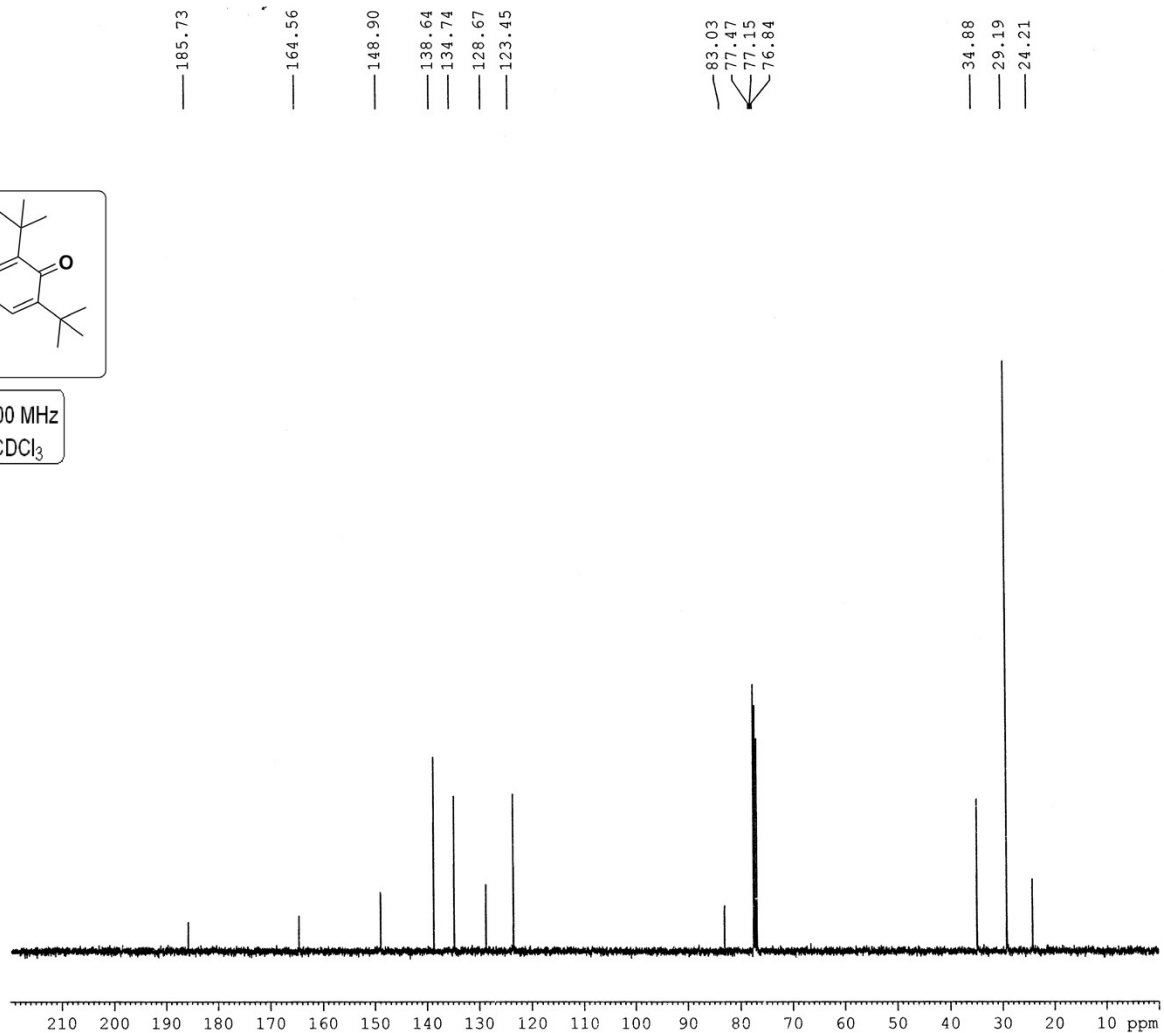

Current Data Parameters  
NAME Dr. A HAJRA-2025-13C  
EXPNO 311  
PROCNO 1

F2 - Acquisition Parameters  
Date\_ 20250910  
Time 10.14  
INSTRUM spect  
PROBHD 5 mm PABBO BB/  
PULPROG zgpg30  
TD 32768  
SOLVENT CDCl3  
NS 80  
DS 2  
SWH 24038.461 Hz  
FIDRES 0.733596 Hz  
AQ 0.6815744 sec  
RG 186.42  
DW 20.800 usec  
DE 6.50 usec  
TE 294.1 K  
D1 2.00000000 sec  
D11 0.03000000 sec  
TD0 1

===== CHANNEL f1 =====  
SFO1 100.6278588 MHz  
NUC1 13C  
P1 8.90 usec  
PLW1 54.00000000 W

===== CHANNEL f2 =====  
SFO2 400.1516006 MHz  
NUC2 1H  
CFDPRG2 waltz16  
PCPD2 90.00 usec  
PLW2 12.00000000 W  
PLW12 0.32231000 W  
PLW13 0.16212000 W

F2 - Processing parameters  
SI 16384  
SF 100.6177859 MHz  
WDW EM  
SSB 0  
LB 1.00 Hz  
GB 0  
PC 1.40
